# Supplementary material for: Deep Learning-driven research for drug discovery: Tackling Malaria
Source: PLoS Comput Biol. 2020 Feb 18;16(2):e1007025. doi: 10.1371/journal.pcbi.1007025 (PMC7048302; doi:10.1371/journal.pcbi.1007025)
Supplement: S1 File — (XLSX) [file pcbi.1007025.s001.xlsx]

## Sheet: default
Molecule (SMILES format)	Outcome
C([H])([H])([H])OC1C([H])=C([H])C(C([H])([H])N(C(N2N=C(S(C3([H])C4([H])C([H])([H])C([H])(C([H])([H])C4([H])[H])C3([H])[H])(=O)=O)N=C2[H])=O)C2([H])C([H])([H])C2([H])[H])=C([H])C=1[H]	Inactive
C([H])([H])([H])N1C([H])([H])C([H])([H])N(C([H])([H])C([H])([H])N([H])C2C3=C(C4C(C3=O)=C([H])C([H])=C([H])C=4[H])C3C(=C([H])C([H])=C(C=3[H])Cl)N=2)C([H])([H])C1([H])[H]	Inactive
ClC1C([H])=C(C2(C(=O)N(C3([H])C([H])([H])C([H])([H])C([H])([H])C([H])([H])C3([H])[H])C(=N[H])N2[H])C2C([H])=C(Cl)C([H])=C([H])C=2[H])C([H])=C([H])C=1[H]	Inactive
ClC1C([H])=C([H])C(C2(C(=O)N(C3([H])C([H])([H])C([H])([H])C([H])([H])C([H])([H])C3([H])[H])C(=N[H])N2[H])C2C([H])=C([H])C(Cl)=C([H])C=2[H])=C([H])C=1[H]	Inactive
O([H])C(C1=C(C2C([H])=C([H])C(F)=C([H])C=2[H])N(C([H])([H])C2C([H])=C([H])C([H])=C([H])C=2[H])N=N1)(C1C([H])=C([H])C(Cl)=C([H])C=1[H])C([H])([H])N([H])C1C([H])=C([H])C(Br)=C([H])C=1[H]	Inactive
O([H])N1C2C(=C([H])C(=C([H])C=2[H])F)C([H])=C(C2C3C(=C([H])C([H])=C([H])C=3[H])C([H])=C([H])C=2[H])C1=O	Inactive
C([H])([H])([H])C([H])([H])OC1C(O[H])=C([H])C([H])=C(C([H])=NN=C(C([H])([H])C([H])(C2C([H])=C3C(C([H])=C([H])C([H])=C3[H])=C([H])C=2[H])O[H])N([H])[H])C=1[H]	Inactive
C([H])([H])([H])C([H])([H])N1C(=O)C2(C([H])([H])C([H])([H])N(C([H])([H])C3C(O[H])=C([H])C([H])=C([H])C=3[H])C([H])([H])C2([H])[H])N(C([H])([H])C([H])([H])C([H])(C([H])([H])[H])C([H])([H])[H])C1=O	Inactive
C([H])([H])([H])C([H])([H])C([H])(C([H])(C(N1C([H])([H])C([H])([H])N(C(C([H])(N2C(=O)C3C(=C([H])C([H])=C([H])C=3[H])C2=O)C([H])(C([H])([H])C([H])([H])[H])C([H])([H])[H])=O)C([H])([H])C1([H])[H])=O)N1C(=O)C2C(=C([H])C([H])=C([H])C=2[H])C1=O)C([H])([H])[H]	Inactive
C([H])([H])([H])C([H])([H])N1C(=O)C2(C([H])([H])C([H])([H])N(C([H])([H])C3C(O[H])=C(Cl)C([H])=C([H])C=3[H])C([H])([H])C2([H])[H])N(C([H])([H])C([H])([H])C([H])(C([H])([H])[H])C([H])([H])[H])C1=O	Inactive
C([H])([H])([H])C([H])=C1C([H])([H])N2C3([H])C4(C5C(N6C4([H])C([H])(C([H])(C4([H])C(=O)N7C8C(C9%10C%11([H])N(C([H])([H])C(C([H])(C%11([H])[H])C([H])(C97[H])C46[H])=C([H])C([H])([H])[H])C([H])([H])C%10([H])[H])=C([H])C([H])=C([H])C=8[H])O[H])C1([H])C3([H])[H])=C([H])C([H])=C([H])C=5[H])C([H])([H])C2([H])[H]	Inactive
C([H])([H])([H])C([H])([H])C([H])([H])C([H])([H])C([H])([H])C1C([H])=C([H])C(C2C([H])=C3C(C(N(C(N([H])[H])=N3)C([H])([H])C3([H])OC([H])(C4C([H])=C([H])C([H])=C([H])C=4[H])C([H])([H])C3([H])[H])=O)=C([H])C=2[H])=C([H])C=1[H]	Inactive
C([H])([H])([H])S(C1C([H])=C([H])C(C2C([H])=C3C(N=C([H])C4=C3N(C3C([H])=C(C(F)(F)F)C([H])=C([H])C=3[H])C(=O)N4[H])=C([H])C=2[H])=C([H])C=1[H])(=O)=O	Inactive
C([H])([H])([H])C1C(C(N([H])OC([H])([H])C([H])([H])C([H])([H])C([H])([H])C([H])([H])C(N([H])O[H])=O)=O)=C([H])C([H])=C([H])C=1[H]	Inactive
C([H])([H])([H])C([H])([H])C([H])([H])N1C(=O)C(C2C([H])=C([H])C(OC([H])([H])[H])=C([H])C=2[H])(C2C([H])=C([H])C(OC([H])([H])[H])=C([H])C=2[H])N([H])C1=N[H]	Inactive
C([H])([H])([H])C(OC([H])([H])C1([H])C([H])(OC(C([H])([H])[H])=O)C([H])(OC(C([H])([H])[H])=O)C([H])(OC(C([H])([H])[H])=O)C([H])(C([H])([H])C(C([H])=C([H])C2C([H])=C(N([H])S(C3C([H])=C([H])C(C([H])([H])[H])=C([H])C=3[H])(=O)=O)C([H])=C([H])C=2[H])=O)O1)=O	Inactive
C([H])([H])([H])C1C2C(=C(C3=C(C=2[H])C2C(=C([H])C([H])=C([H])C=2[H])N3[H])C([H])([H])[H])C([H])=C([H])N=1	Inactive
N([H])([H])C1N(C([H])([H])C2([H])OC([H])(C3C([H])=C([H])C([H])=C([H])C=3[H])C([H])([H])C2([H])[H])C(=O)C2C(=C([H])C(C3C([H])=C([H])C(C([H])([H])C([H])([H])C([H])([H])C4C([H])=C([H])C([H])=C([H])C=4[H])=C([H])C=3[H])=C([H])C=2[H])N=1	Inactive
C([H])([H])([H])C1C([H])=C([H])C(C2(C(=O)N(C3([H])C([H])([H])C([H])([H])C([H])([H])C([H])([H])C3([H])[H])C(=N[H])N2[H])C2C([H])=C([H])C(C([H])([H])[H])=C([H])C=2[H])=C([H])C=1[H]	Inactive
C([H])([H])([H])N(C(N1N=C(S(C2([H])C3([H])C([H])([H])C([H])(C([H])([H])C3([H])[H])C2([H])[H])(=O)=O)N=C1[H])=O)C([H])([H])C1C(C(F)(F)F)=C([H])C([H])=C([H])C=1[H]	Inactive
FC1C([H])=C2C(C(C(C([H])([H])SC3C([H])=C([H])C(Br)=C([H])C=3[H])=O)=C([H])N2[H])=C([H])C=1[H]	Inactive
BrC1C([H])=C([H])C(SC([H])([H])C(C2C3C(=C([H])C([H])=C([H])C=3[H])N([H])C=2[H])=O)=C([H])C=1[H]	Inactive
C([H])([H])([H])OC1C([H])=C2C(N(C(C(C3C4C(=C([H])C([H])=C([H])C=4[H])C([H])=C([H])C=3[H])=C2[H])=O)O[H])=C([H])C=1[H]	Inactive
C([H])([H])([H])OC1C([H])=C2C(N(C(C(C3C(C([H])([H])[H])=C([H])C([H])=C([H])C=3[H])=C2[H])=O)O[H])=C([H])C=1[H]	Inactive
O([H])C(C1=C(C2C([H])=C([H])C(Cl)=C([H])C=2[H])N(C([H])([H])C2C([H])=C([H])C([H])=C([H])C=2[H])N=N1)(C1C([H])=C([H])C(Cl)=C([H])C=1[H])C([H])([H])N([H])C1C2C(=C([H])C([H])=C([H])C=2[H])C([H])=C([H])C=1[H]	Inactive
N([H])([H])C1N=C([H])C(C2C([H])=C3C(N=C([H])C4=C3N(C3([H])C([H])([H])C([H])([H])C([H])([H])C([H])([H])C3([H])[H])C(=O)N4[H])=C([H])C=2[H])=C([H])C=1[H]	Inactive
C([H])([H])(C1C([H])=C([H])C(C([H])([H])N2C([H])([H])C([H])([H])C([H])(C3C4C(=C([H])C([H])=C([H])C=4[H])N([H])C=3[H])C([H])([H])C2([H])[H])=C([H])C=1[H])N1C([H])([H])C([H])([H])C([H])([H])C([H])([H])C1([H])[H]	Inactive
BrC1C(C(N([H])C2SC([H])=C(C3N=C([H])C([H])=C([H])C=3[H])N=2)=O)=C([H])C([H])=C([H])C=1[H]	Inactive
C([H])([H])([H])C([H])(C1C([H])=C2C([H])([H])C([H])([H])C3([H])C(C2=C([H])C=1[H])(C([H])([H])[H])C([H])([H])C([H])([H])C([H])([H])C3(C([H])([H])N1C(=O)C2C(=C([H])C([H])=C([H])C=2[H])C1=O)C([H])([H])[H])C([H])([H])[H]	Inactive
C([H])([H])([H])C(OC1([H])C([H])(OC(C([H])([H])[H])=O)C([H])(OC(C([H])([H])[H])=O)C([H])(C([H])([H])C(C([H])=C([H])C2C([H])=C(N([H])S(C3C([H])=C([H])C(C([H])([H])[H])=C([H])C=3[H])(=O)=O)C([H])=C([H])C=2[H])=O)OC1([H])[H])=O	Inactive
ClC1C([H])=C([H])C(SC([H])([H])C(C2C3C(=C([H])C([H])=C([H])C=3[H])N([H])C=2[H])=O)=C([H])C=1[H]	Inactive
O([H])N1C2C(=C(C([H])=C([H])C=2[H])F)C([H])=C(C2C3C(=C([H])C([H])=C([H])C=3[H])C([H])=C([H])C=2[H])C1=O	Inactive
C([H])([H])([H])C([H])([H])N1C(=O)C2(C([H])([H])C([H])([H])N(C([H])([H])C3C(O[H])=C([H])C([H])=C(F)C=3[H])C([H])([H])C2([H])[H])N(C([H])([H])C([H])([H])C([H])(C([H])([H])[H])C([H])([H])[H])C1=O	Inactive
C([H])([H])([H])C1C([H])=C([H])C(N([H])C(C2C(=O)OC(C3C([H])=C([H])C([H])=C([H])C=3[H])=C([H])C=2O[H])=O)=C([H])C=1[H]	Inactive
O=C(N1N=C(SC([H])([H])C2C([H])=C([H])C([H])=C([H])C=2[H])N=C1[H])N1C([H])([H])C([H])([H])C([H])([H])C1([H])[H]	Inactive
C([H])([H])([H])C1C([H])=C([H])C(N([H])C2SC([H])=C(C3N=C([H])C([H])=C([H])C=3[H])N=2)=C([H])C=1[H]	Inactive
C([H])([H])([H])OC([H])(C1C([H])=C([H])C(C(N([H])C2SC([H])=C(C3N=C([H])C([H])=C([H])C=3[H])N=2)=O)=C([H])C=1[H])OC([H])([H])[H]	Inactive
O([H])C(C1=C(C2C([H])=C([H])C(Cl)=C([H])C=2[H])N(C([H])([H])C2C([H])=C([H])C([H])=C([H])C=2[H])N=N1)(C1C([H])=C([H])C(Cl)=C([H])C=1[H])C([H])([H])N([H])C1C([H])=C([H])C(I)=C([H])C=1[H]	Inactive
C([H])([H])([H])OC1C([H])=C([H])C(C2(C(=O)N(C3([H])C([H])([H])C([H])([H])C([H])([H])C([H])([H])C3([H])[H])C(=N[H])N2[H])C2C([H])=C(C3C([H])=C([H])C([H])=C([H])C=3[H])C([H])=C([H])C=2[H])=C([H])C=1[H]	Inactive
C([H])([H])([H])C([H])([H])N1C(=O)C2(C([H])([H])C([H])([H])N(C([H])([H])C3C(O[H])=C([H])C([H])=C(Cl)C=3[H])C([H])([H])C2([H])[H])N(C([H])([H])C2C([H])=C([H])C(C#N)=C([H])C=2[H])C1=O	Inactive
C([H])([H])([H])OC1C([H])=C2C(N=C(C3N2C([H])=C([H])C=3[H])C([H])=C([H])C([H])=C([H])C([H])([H])[H])=C([H])C=1[H]	Inactive
N([H])([H])C1([H])C([H])([H])C([H])([H])C([H])(N([H])C2=NN3C(=NC([H])=C3C3C([H])=NC(N([H])C([H])([H])C4N=C([H])C([H])=C([H])C=4[H])=NC=3[H])C([H])=C2[H])C([H])([H])C1([H])[H]	Inactive
C([H])([H])([H])C([H])([H])C([H])([H])C1([H])C([H])([H])C2C(=NC3C(C=2N([H])[H])=C([H])C([H])=C([H])C=3[H])C([H])([H])C1([H])[H]	Inactive
C([H])([H])([H])OC1C([H])=C([H])C(C2OC(=O)C(C(N([H])C3C([H])=C([H])C(O[H])=C([H])C=3[H])=O)=C(N3C([H])([H])C([H])([H])N(C([H])([H])[H])C([H])([H])C3([H])[H])C=2[H])=C([H])C=1[H]	Inactive
FC1C([H])=C([H])C(C2C([H])=C3C(N=C([H])C4=C3N(C3C([H])=C(C(F)(F)F)C([H])=C([H])C=3[H])C(=O)N4[H])=C([H])C=2[H])=C([H])C=1[H]	Inactive
C([H])([H])([H])C([H])(C1C([H])=C([H])C(C2N(C([H])([H])C3C([H])=C([H])C([H])=C([H])C=3[H])N=NC=2C(C2C([H])=C([H])C(Cl)=C([H])C=2[H])(C([H])([H])N([H])C2C([H])=C([H])C(F)=C([H])C=2[H])O[H])=C([H])C=1[H])C([H])([H])[H]	Inactive
O([H])C(C1=C(C2C([H])=C([H])C(Cl)=C([H])C=2[H])N(C([H])([H])C2C([H])=C([H])C([H])=C([H])C=2[H])N=N1)(C1C([H])=C([H])C(Cl)=C([H])C=1[H])C([H])([H])N([H])C1C([H])=C([H])C(Br)=C([H])C=1[H]	Inactive
C([H])([H])([H])C([H])([H])C([H])([H])C([H])=C([H])C([H])=C([H])C1C2N(C([H])=C([H])C=2[H])C2C(=C([H])C([H])=C([H])C=2OC([H])([H])[H])N=1	Inactive
O([H])C1C(C([H])=NN([H])C2C3C(=C([H])C([H])=C([H])C=3[H])C([H])=NN=2)=C([H])C(Cl)=C([H])C=1[H]	Inactive
O([H])C(C1=C(C2C([H])=C([H])C([H])=C([H])C=2[H])N(C([H])([H])C2C([H])=C([H])C([H])=C([H])C=2[H])N=N1)(C1C([H])=C([H])C(Br)=C([H])C=1[H])C([H])([H])N([H])C1C([H])=C([H])C(Br)=C([H])C=1[H]	Inactive
C([H])([H])([H])OC1C(Br)=C([H])C([H])=C(N([H])C([H])([H])C(C2=C(C3C([H])=C([H])C(Cl)=C([H])C=3[H])N(C([H])([H])C3C([H])=C([H])C([H])=C([H])C=3[H])N=N2)(C2C([H])=C([H])C(Cl)=C([H])C=2[H])O[H])C=1[H]	Inactive
C([H])([H])([H])OC1C([H])=C([H])C(C2(C(=O)N(C([H])(C([H])([H])[H])C([H])([H])[H])C(=N[H])N2[H])C2C([H])=C([H])C(OC([H])([H])[H])=C([H])C=2[H])=C([H])C=1[H]	Inactive
FC(C1C([H])=C(N2C3C(=C([H])N=C4C=3C([H])=C(C3C([H])=C([H])C(Cl)=C([H])C=3[H])C([H])=C4[H])N([H])C2=O)C([H])=C([H])C=1[H])(F)F	Inactive
C([H])([H])([H])C([H])([H])C12OC3(C45C([H])([H])C(=O)C6([H])C(C4(C([H])([H])[H])C([H])([H])C3([H])[H])(C([H])(OC(C([H])([H])[H])=O)C([H])([H])C([H])(C6(C([H])([H])C([H])([H])C(OC([H])([H])[H])=O)C([H])([H])[H])C(C([H])([H])[H])=C([H])[H])OC5([H])[H])C(O1)(C([H])([H])[H])C([H])([H])C2([H])[H]	Inactive
C([H])([H])([H])OC1C([H])=C([H])C(C([H])(P(O[H])(O[H])=O)C([H])([H])C([H])([H])C(N([H])O[H])=O)=C([H])C=1[H]	Inactive
FC1C([H])=C([H])C(SC([H])([H])C(C2C3C(=C([H])C([H])=C([H])C=3[H])N([H])C=2[H])=O)=C([H])C=1[H]	Inactive
ClC1C([H])=C2C(N=C(C3=C2C2C(=C([H])C([H])=C([H])C=2[H])C3=O)N([H])C([H])([H])C([H])([H])N2C([H])([H])C([H])([H])C([H])([H])C([H])([H])C2([H])[H])=C([H])C=1[H]	Inactive
C([H])([H])([H])N1C2C([H])=NC3C(C=2N(C2C([H])=C(C(F)(F)F)C([H])=C([H])C=2[H])C1=O)=C([H])C(C1C([H])=C([H])C(Cl)=C([H])C=1[H])=C([H])C=3[H]	Inactive
C([H])([H])([H])N([H])C(C([H])([H])C([H])([H])C([H])([H])C([H])([H])C([H])([H])C([H])(C1N([H])C(C2C(OC([H])([H])[H])=NC3C(=C([H])C([H])=C([H])C=3[H])C=2[H])=C([H])N=1)N([H])C(C([H])([H])N1N=NC([H])=C1[H])=O)=O	Inactive
C([H])([H])([H])C1C([H])=C([H])C(C(C2=C(C3C([H])=C([H])C(Cl)=C([H])C=3[H])N(C([H])([H])C3C([H])=C([H])C([H])=C([H])C=3[H])N=N2)(C([H])([H])N([H])C2C([H])=C(C([H])([H])[H])C(C([H])([H])[H])=C([H])C=2[H])O[H])=C([H])C=1[H]	Inactive
ClC1C([H])=C([H])C(OC([H])([H])C(C2C3C(=C([H])C([H])=C([H])C=3[H])N([H])C=2[H])=O)=C([H])C=1[H]	Inactive
C([H])([H])([H])OC1C([H])=C2C3([H])C([H])(C([H])([H])S(C2=C([H])C=1[H])(=O)=O)C([H])(OC([H])([H])C1C([H])=C([H])C([H])=C([H])C=1[H])C([H])(OC([H])([H])C1C([H])=C([H])C([H])=C([H])C=1[H])C([H])(C([H])([H])OC([H])([H])C1C([H])=C([H])C([H])=C([H])C=1[H])O3	Inactive
C([H])([H])([H])C([H])(C1([H])C2(C([H])(C3([H])C([H])(C([H])([H])C2([H])O[H])C2(C([H])(C([H])([H])C([H])(C([H])([H])C2([H])[H])O[H])C([H])([H])C3([H])O[H])C([H])([H])[H])C([H])([H])C1([H])[H])C([H])([H])[H])C([H])([H])C([H])([H])C1N=C2C(C([H])=C([H])C([H])=C2[H])=C(C([H])(C2([H])N3C([H])([H])C([H])(C([H])(C([H])([H])C3([H])[H])C2([H])[H])C([H])=C([H])[H])O[H])C=1[H]	Inactive
C([H])([H])([H])C1C([H])=C2C(N([H])C([H])=C2C(C([H])([H])SC2C([H])=C([H])C(Br)=C([H])C=2[H])=O)=C(Br)C=1[H]	Inactive
C([H])([H])([H])OC1C([H])=C([H])C(C2(C(=O)N(C3([H])C([H])([H])C([H])([H])C([H])([H])C([H])([H])C3([H])[H])C(=N[H])N2[H])C2C([H])=C(C3N=C([H])C([H])=C([H])C=3[H])C([H])=C([H])C=2[H])=C([H])C=1[H]	Inactive
C([H])([H])([H])OC1C([H])=C2C(N=C(C([H])=C2C([H])(C2([H])N3C([H])([H])C([H])(C([H])(C([H])([H])C3([H])[H])C2([H])[H])C([H])=C([H])[H])O[H])C([H])([H])C([H])([H])C([H])(C2([H])C3(C([H])(C4([H])C([H])(C([H])([H])C3([H])O[H])C3(C([H])(C([H])([H])C([H])(C([H])([H])C3([H])[H])O[H])C([H])([H])C4([H])O[H])C([H])([H])[H])C([H])([H])C2([H])[H])C([H])([H])[H])C([H])([H])[H])=C([H])C=1[H]	Inactive
C([H])([H])([H])C(OC([H])([H])C1([H])C([H])(OC(C([H])([H])[H])=O)C([H])(OC(C([H])([H])[H])=O)C([H])(OC(C([H])([H])[H])=O)C([H])(C([H])([H])C(C([H])=C([H])C2C([H])=C([H])C(N([H])C(N([H])C3C([H])=C([H])C([H])=C([H])C=3[H])=S)=C([H])C=2[H])=O)O1)=O	Inactive
C([H])([H])([H])N(C(N1N=C(S(C2([H])C3([H])C([H])([H])C([H])(C([H])([H])C3([H])[H])C2([H])[H])(=O)=O)N=C1[H])=O)C([H])([H])C1C([H])=C(C(F)(F)F)C([H])=C([H])C=1[H]	Inactive
C([H])([H])([H])C([H])([H])N(C(N1N=C(SC2C(C([H])([H])[H])=C([H])C(C([H])([H])[H])=C([H])C=2C([H])([H])[H])N=C1[H])=O)C([H])([H])[H]	Inactive
O([H])N1C2C(=C3C(=C([H])C=2[H])OC([H])([H])O3)C([H])=C(C2C3C(=C([H])C([H])=C([H])C=3[H])C([H])=C([H])C=2[H])C1=O	Inactive
N([H])([H])C(C([H])([H])C([H])(C1C([H])=C2C(C([H])=C([H])C([H])=C2[H])=C([H])C=1[H])O[H])=NN=C([H])C1C([H])=C(Cl)C(Cl)=C([H])C=1[H]	Inactive
C([H])([H])([H])C(OC([H])([H])C1([H])C([H])(OC(C([H])([H])[H])=O)C([H])(OC(C([H])([H])[H])=O)C([H])(OC(C([H])([H])[H])=O)C([H])(C([H])([H])C(C([H])=C([H])C2C([H])=C(N([H])C(N([H])C3C([H])=C([H])C([H])=C([H])C=3[H])=S)C([H])=C([H])C=2[H])=O)O1)=O	Inactive
O([H])C(C1=C(C2C([H])=C([H])C([H])=C([H])C=2[H])N(C([H])([H])C2C([H])=C([H])C([H])=C([H])C=2[H])N=N1)(C1C([H])=C([H])C(Cl)=C([H])C=1[H])C([H])([H])N([H])C1C([H])=C([H])C(Br)=C([H])C=1[H]	Inactive
C([H])([H])([H])ON([H])C(N([H])C([H])([H])C([H])([H])C([H])([H])C([H])(C(N([H])C([H])(C(N([H])C([H])(C([H])(C([H])([H])C(N([H])C([H])([H])C([H])([H])C1C([H])=C([H])C([H])=C([H])C=1[H])=O)O[H])C([H])([H])C([H])(C([H])([H])[H])C([H])([H])[H])=O)C([H])(C([H])([H])[H])C([H])([H])[H])=O)N([H])C(OC([H])([H])C1C([H])=C([H])C([H])=C([H])C=1[H])=O)=N[H]	Inactive
N([H])([H])C(C([H])([H])C([H])(C1C([H])=C2C(C([H])=C([H])C([H])=C2[H])=C([H])C=1[H])O[H])=NN=C([H])C1C([H])=C([H])C(F)=C([H])C=1[H]	Inactive
C([H])([H])([H])C([H])(C1([H])C(=O)N([H])C([H])(C([H])([H])C2C([H])=C([H])C([H])=C([H])C=2[H])C(=O)N([H])C([H])(C([H])([H])C2C([H])=C([H])C([H])=C([H])C=2[H])C(=O)N([H])C([H])([H])C(=O)N([H])C([H])(C([H])([H])C2C([H])=C([H])C([H])=C([H])C=2[H])C(=O)N([H])C([H])(C([H])([H])C2C([H])=C([H])C([H])=C([H])C=2[H])C(=O)N([H])C([H])([H])C(=O)N1[H])O[H]	Inactive
N([H])([H])C1([H])C([H])([H])C([H])([H])C([H])(N([H])C2=NN3C(=NC([H])=C3C3C([H])=NC(N([H])C4N=C([H])C([H])=C([H])N=4)=NC=3[H])C([H])=C2[H])C([H])([H])C1([H])[H]	Inactive
C([H])([H])([H])C1C([H])=C2C(N=C3C(=C2N([H])[H])C([H])([H])C([H])([H])C([H])([H])C3([H])[H])=C([H])C=1[H]	Inactive
O=S1(C2C([H])=C([H])C3C(C=2C2([H])C([H])(C([H])(C([H])(C([H])(O2)C([H])([H])OC([H])([H])C2C([H])=C([H])C([H])=C([H])C=2[H])OC([H])([H])C2C([H])=C([H])C([H])=C([H])C=2[H])OC([H])([H])C2C([H])=C([H])C([H])=C([H])C=2[H])C1([H])[H])=C([H])C([H])=C([H])C=3[H])=O	Inactive
C([H])([H])([H])C([H])(C1C(OC(C([H])([H])[H])=O)=C([H])C2=C(C([H])([H])C([H])([H])C3([H])C2(C([H])([H])[H])C([H])([H])C([H])([H])C([H])([H])C3(C([H])([H])N2C(=O)C3C(=C([H])C([H])=C([H])C=3[H])C2=O)C([H])([H])[H])C=1[H])C([H])([H])[H]	Inactive
C([H])([H])([H])C([H])([H])N1C(=O)C2(C([H])([H])C([H])([H])N(C([H])([H])C3C(O[H])=C([H])C(Cl)=C([H])C=3[H])C([H])([H])C2([H])[H])N(C([H])([H])C([H])([H])C([H])(C([H])([H])[H])C([H])([H])[H])C1=O	Inactive
O([H])C(C1=C(C2C([H])=C([H])C(Cl)=C([H])C=2[H])N(C([H])([H])C2C([H])=C([H])C([H])=C([H])C=2[H])N=N1)(C1C([H])=C([H])C(Cl)=C([H])C=1[H])C([H])([H])N([H])C1C([H])=C(F)C(F)=C([H])C=1[H]	Inactive
C([H])([H])([H])C(OC([H])([H])C1([H])C([H])(OC(C([H])([H])[H])=O)C([H])(OC(C([H])([H])[H])=O)C([H])(OC(C([H])([H])[H])=O)C([H])(C([H])([H])C(C([H])=C([H])C2C([H])=C([H])C(N([H])C(N([H])C3C([H])=C4C(C([H])=C([H])C([H])=C4[H])=C([H])C=3[H])=O)=C([H])C=2[H])=O)O1)=O	Inactive
C([H])([H])([H])C1C([H])=C([H])C(S(N([H])C2C([H])=C(C([H])=C([H])C(C([H])([H])C3([H])C([H])(O[H])C([H])(O[H])C([H])(O[H])C([H])(C([H])([H])O[H])O3)=O)C([H])=C([H])C=2[H])(=O)=O)=C([H])C=1[H]	Inactive
FC(OC1C([H])=C([H])C(C2(C(=O)N(C3([H])C([H])([H])C([H])([H])C([H])([H])C([H])([H])C3([H])[H])C(=N[H])N2[H])C2C([H])=C([H])C(OC(F)(F)F)=C([H])C=2[H])=C([H])C=1[H])(F)F	Inactive
C([H])([H])([H])OC1C([H])=C2C(S([H])(C([H])([H])C3([H])C2([H])OC([H])(C([H])([H])OC([H])([H])C2C([H])=C([H])C([H])=C([H])C=2[H])C([H])(OC([H])([H])C2C([H])=C([H])C([H])=C([H])C=2[H])C3([H])OC([H])([H])C2C([H])=C([H])C([H])=C([H])C=2[H])O[H])=C([H])C=1[H]	Inactive
C([H])([H])([H])C([H])([H])N(C(N1N=C(SC2([H])C3([H])C([H])([H])C([H])(C([H])([H])C3([H])[H])C2([H])[H])N=C1[H])=O)C([H])([H])C([H])([H])[H]	Inactive
C([H])([H])([H])C1C(C([H])([H])[H])=C([H])C(N([H])C([H])([H])C(C2=C(C3C([H])=C([H])C(Cl)=C([H])C=3[H])N(C([H])([H])C3C([H])=C([H])C([H])=C([H])C=3[H])N=N2)(C2C([H])=C([H])C(Cl)=C([H])C=2[H])O[H])=C([H])C=1[H]	Inactive
C([H])([H])([H])C(OC([H])([H])C1([H])C([H])(OC(C([H])([H])[H])=O)C([H])(OC(C([H])([H])[H])=O)C([H])(OC(C([H])([H])[H])=O)C([H])(C([H])([H])C(C([H])=C([H])C2C([H])=C(N([H])C(N([H])C3C([H])=C([H])C([H])=C([H])C=3[H])=O)C([H])=C([H])C=2[H])=O)O1)=O	Inactive
C([H])([H])([H])C([H])([H])C([H])([H])C([H])=C([H])C([H])=C([H])C1C2N(C([H])=C([H])C=2[H])C2C(=C([H])C(=C([H])C=2[H])OC([H])([H])[H])N=1	Inactive
C([H])([H])([H])C1C([H])=C2C3([H])C([H])(C([H])([H])S(C2=C([H])C=1[H])(=O)=O)C([H])(OC([H])([H])C1C([H])=C([H])C([H])=C([H])C=1[H])C([H])(OC([H])([H])C1C([H])=C([H])C([H])=C([H])C=1[H])C([H])(C([H])([H])OC([H])([H])C1C([H])=C([H])C([H])=C([H])C=1[H])O3	Inactive
ClC1C([H])=C2C(C3=C(C(=N2)N([H])C([H])([H])C([H])([H])N2C([H])([H])C([H])([H])C([H])([H])C([H])([H])C2([H])[H])C(=O)C2C3=C([H])C([H])=C([H])C=2[H])=C([H])C=1[H]	Inactive
C([H])([H])([H])C1C2=C(C3([H])C([H])(C([H])([H])S2(=O)=O)C([H])(OC([H])([H])C2C([H])=C([H])C([H])=C([H])C=2[H])C([H])(OC([H])([H])C2C([H])=C([H])C([H])=C([H])C=2[H])C([H])(C([H])([H])OC([H])([H])C2C([H])=C([H])C([H])=C([H])C=2[H])O3)C([H])=C([H])C=1[H]	Inactive
FC(C1C([H])=C(N2C3C(=C([H])N=C4C=3C([H])=C(C3C([H])=C5C(C([H])=C([H])C([H])=C5[H])=NC=3[H])C([H])=C4[H])N([H])C2=O)C([H])=C([H])C=1[H])(F)F	Inactive
C([H])([H])([H])OC1C([H])=C([H])C(C2(C(=O)N(C([H])([H])C([H])([H])C3C([H])=C([H])C([H])=C([H])C=3[H])C(=N[H])N2[H])C2C([H])=C([H])C(OC([H])([H])[H])=C([H])C=2[H])=C([H])C=1[H]	Inactive
FC1C2=C(C(C(C([H])([H])SC3C([H])=C([H])C(Br)=C([H])C=3[H])=O)=C([H])N2[H])C([H])=C([H])C=1[H]	Inactive
C([H])([H])([H])C(C([H])([H])[H])=C([H])C([H])([H])C([H])([H])C(C([H])([H])[H])=C([H])C([H])([H])N([H])C([H])([H])C([H])([H])C([H])([H])OC1([H])C2([H])C([H])([H])C3([H])C([H])([H])C([H])(C([H])([H])C1([H])C3([H])[H])C2([H])[H]	Inactive
C([H])([H])([H])C([H])=C([H])C([H])=C([H])C1C2N(C([H])=C([H])C=2[H])C2C(=C([H])C([H])=C([H])C=2[H])N=1	Inactive
C([H])([H])([H])C(C([H])([H])[H])=C([H])C([H])([H])C([H])([H])C(C([H])([H])[H])=C([H])C([H])([H])N([H])C([H])([H])C([H])([H])OC1([H])C2([H])C([H])([H])C3([H])C([H])([H])C([H])(C([H])([H])C1([H])C3([H])[H])C2([H])[H]	Inactive
C([H])([H])([H])C([H])([H])C([H])([H])C([H])([H])C([H])([H])N([H])C(C([H])([H])C([H])([H])N([H])C(C([H])(C(C([H])([H])C([H])=C([H])[H])(C([H])([H])O[H])C([H])([H])[H])O[H])=O)=O	Inactive
O([H])C(C1=C(C2C([H])=C([H])C(Cl)=C([H])C=2[H])N(C([H])([H])C2C([H])=C([H])C(Br)=C([H])C=2[H])N=N1)(C1C([H])=C([H])C(Cl)=C([H])C=1[H])C([H])([H])N([H])C1C([H])=C([H])C(Br)=C([H])C=1[H]	Inactive
C([H])([H])([H])C([H])(C1C(O[H])=C([H])C2=C(C([H])([H])C([H])([H])C3([H])C2(C([H])([H])[H])C([H])([H])C([H])([H])C([H])([H])C3(C([H])([H])[H])C([H])([H])[H])C=1[H])C([H])([H])[H]	Inactive
O([H])N1C2C(=C([H])C(=C([H])C=2[H])O[H])C([H])=C(C2C3C(=C([H])C([H])=C([H])C=3[H])C([H])=C([H])C=2[H])C1=O	Inactive
C([H])([H])([H])C([H])([H])C([H])([H])C([H])=C([H])C([H])=C([H])C1C2N(C([H])=C([H])C=2[H])C2C(=C([H])C([H])=C([H])C=2[H])N=1	Inactive
C([H])([H])([H])C([H])(C([H])([H])C([H])(C([H])(C([H])([H])C(N([H])C([H])([H])C([H])([H])C1C([H])=C([H])C([H])=C([H])C=1[H])=O)O[H])N([H])C(C([H])(C([H])(C([H])([H])[H])C([H])([H])[H])N([H])C(C([H])(N([H])S(C([H])([H])C1C([H])=C([H])C([H])=C([H])C=1[H])(=O)=O)C([H])([H])C([H])([H])C([H])([H])N([H])C(N([H])[H])=N[H])=O)=O)C([H])([H])[H]	Inactive
O([H])S1([H])C2C([H])=C([H])C3C(C=2C2([H])C([H])(C([H])(C([H])(C([H])(O2)C([H])([H])OC([H])([H])C2C([H])=C([H])C([H])=C([H])C=2[H])OC([H])([H])C2C([H])=C([H])C([H])=C([H])C=2[H])OC([H])([H])C2C([H])=C([H])C([H])=C([H])C=2[H])C1([H])[H])=C([H])C([H])=C([H])C=3[H]	Inactive
C([H])([H])([H])C1C([H])=C2C(S([H])(C([H])([H])C3([H])C2([H])OC([H])(C([H])([H])OC([H])([H])C2C([H])=C([H])C([H])=C([H])C=2[H])C([H])(OC([H])([H])C2C([H])=C([H])C([H])=C([H])C=2[H])C3([H])OC([H])([H])C2C([H])=C([H])C([H])=C([H])C=2[H])O[H])=C([H])C=1[H]	Inactive
C([H])([H])([H])C1C(C([H])([H])[H])=C([H])C(N([H])C([H])([H])C(C2=C(C3C([H])=C([H])C([H])=C([H])C=3[H])N(C([H])([H])C3C([H])=C([H])C([H])=C([H])C=3[H])N=N2)(C2C([H])=C([H])C(Cl)=C([H])C=2[H])O[H])=C([H])C=1[H]	Inactive
FC(C1C([H])=C(N2C3C(=C([H])N=C4C=3C([H])=C(C3C([H])=C([H])C(C#N)=C([H])C=3[H])C([H])=C4[H])N([H])C2=O)C([H])=C([H])C=1[H])(F)F	Inactive
C([H])([H])([H])C1C([H])=C([H])C(C([H])(P(O[H])(O[H])=O)C([H])([H])C([H])([H])C(N([H])O[H])=O)=C([H])C=1[H]	Inactive
O([H])N1C2C(=C([H])C([H])=C([H])C=2[H])C([H])=C(C2C3C(=C([H])C([H])=C([H])C=3[H])C([H])=C([H])C=2[H])C1=O	Inactive
C([H])([H])([H])C([H])([H])N1C(=O)C2(C([H])([H])C([H])([H])N(C([H])([H])C3C([H])=C(Cl)C(O[H])=C([H])C=3[H])C([H])([H])C2([H])[H])N(C([H])([H])C([H])([H])C([H])(C([H])([H])[H])C([H])([H])[H])C1=O	Inactive
C([H])([H])([H])C1C(C([H])([H])[H])=C([H])C(N([H])C([H])([H])C(C2=C(C3C([H])=C([H])C(F)=C([H])C=3[H])N(C([H])([H])C3C([H])=C([H])C([H])=C([H])C=3[H])N=N2)(C2C([H])=C([H])C(Cl)=C([H])C=2[H])O[H])=C([H])C=1[H]	Inactive
ClC1C([H])=C2C(C(N3C([H])([H])C([H])([H])N(C4C([H])=C([H])C([H])=C([H])C=4[H])C([H])([H])C3([H])[H])=C([H])C([H])=N2)=C([H])C=1[H]	Inactive
C([H])([H])([H])N(C1C([H])=C([H])C([H])=C([H])C=1[H])C(N1N=C(S(C2([H])C3([H])C([H])([H])C([H])(C([H])([H])C3([H])[H])C2([H])[H])(=O)=O)N=C1[H])=O	Inactive
BrC1C([H])=C([H])C(SC([H])([H])C(C2C3C(=C([H])C([H])=C([H])C=3[H])N(C([H])([H])C3C([H])=C([H])C([H])=C([H])C=3[H])C=2[H])=O)=C([H])C=1[H]	Inactive
N([H])([H])C(C([H])([H])C([H])(C1C2C(=C([H])C([H])=C([H])C=2[H])C([H])=C([H])C=1[H])O[H])=NN=C([H])C1C([H])=NC([H])=C([H])C=1[H]	Inactive
O([H])C(C1=C(C2C([H])=C([H])C([H])=C([H])C=2[H])N(C([H])([H])C2C([H])=C([H])C([H])=C([H])C=2[H])N=N1)(C1C([H])=C([H])C(Br)=C([H])C=1[H])C([H])([H])N([H])C1C([H])=C([H])C(F)=C([H])C=1[H]	Inactive
C([H])([H])([H])C1C(C([H])([H])[H])=C([H])C(N([H])C([H])([H])C(C2=C(C3C([H])=C([H])C([H])=C([H])C=3[H])N(C([H])([H])C3C([H])=C([H])C([H])=C([H])C=3[H])N=N2)(C2C([H])=C([H])C(Br)=C([H])C=2[H])O[H])=C([H])C=1[H]	Inactive
O([H])C(C1=C(C2C([H])=C([H])C(Cl)=C([H])C=2[H])N(C([H])([H])C2C([H])=C([H])C([H])=C([H])C=2[H])N=N1)(C1C([H])=C([H])C(Cl)=C([H])C=1[H])C([H])([H])N([H])C1C([H])=C2C(OC([H])([H])O2)=C([H])C=1[H]	Inactive
C([H])([H])([H])C([H])([H])C([H])(C1C([H])=C([H])C([H])=C([H])C=1[H])C([H])([H])N1C(=O)C(C2C([H])=C([H])C([H])=C([H])C=2[H])(C2C([H])=C([H])C([H])=C([H])C=2[H])N=C1N([H])[H]	Inactive
ClC1C([H])=C2C(C(C(C([H])([H])SC3C([H])=C([H])C(Br)=C([H])C=3[H])=O)=C([H])N2[H])=C([H])C=1[H]	Inactive
C([H])([H])([H])C(C([H])([H])[H])=C([H])C([H])([H])C([H])([H])C(C([H])([H])[H])=C([H])C([H])([H])OC([H])([H])C([H])([H])N([H])C1([H])C2([H])C([H])([H])C3([H])C([H])([H])C([H])(C([H])([H])C1([H])C3([H])[H])C2([H])[H]	Inactive
FC(C1C([H])=C(N2C3C(=C([H])N=C4C=3C([H])=C(C3C([H])=NC([H])=C([H])C=3[H])C([H])=C4[H])N([H])C2=O)C([H])=C([H])C=1[H])(F)F	Inactive
O([H])C(C1=C(C2C([H])=C([H])C(F)=C([H])C=2[H])N(C([H])([H])C2C([H])=C([H])C([H])=C([H])C=2[H])N=N1)(C1C([H])=C([H])C(Cl)=C([H])C=1[H])C([H])([H])N([H])C1C([H])=C([H])C(Cl)=C([H])C=1[H]	Inactive
O([H])N1C2C(=C([H])C([H])=C([H])C=2[H])C([H])=C(C2C([H])=C3C(C([H])=C([H])C([H])=C3[H])=C([H])C=2[H])C1=O	Inactive
C([H])([H])([H])OC1C([H])=C2C(N([H])C([H])=C2C([H])([H])C([H])([H])N([H])C(C2C([H])=C([H])C([H])=C([H])C=2[H])=O)=C([H])C=1[H]	Inactive
C([H])([H])([H])C1C([H])=C([H])C(S(N([H])C2C([H])=C(C([H])=C([H])C(C([H])([H])C3([H])C([H])(O[H])C([H])(O[H])C([H])(O[H])C([H])([H])O3)=O)C([H])=C([H])C=2[H])(=O)=O)=C([H])C=1[H]	Inactive
N([H])([H])C(C([H])(C1C2C(=C([H])C([H])=C([H])C=2[H])C([H])=C([H])C=1[H])O[H])=NN=C([H])C1C([H])=C([H])C([H])=C([H])C=1[H]	Inactive
C([H])([H])([H])C1C(C2C(=O)N(O[H])C3C(=C([H])C([H])=C([H])C=3[H])C=2[H])=C([H])C([H])=C([H])C=1[H]	Inactive
C([H])([H])([H])C(C([H])([H])[H])=C([H])C([H])([H])C([H])([H])C(C([H])([H])[H])=C([H])C([H])([H])N([H])C([H])([H])C([H])([H])N([H])C1([H])C2([H])C([H])([H])C3([H])C([H])([H])C([H])(C([H])([H])C1([H])C3([H])[H])C2([H])[H]	Inactive
C([H])([H])([H])C(OC1([H])C([H])(OC(C([H])([H])[H])=O)C([H])(OC(C([H])([H])[H])=O)C([H])(C([H])([H])C(C([H])=C([H])C2C([H])=C(N([H])C(N([H])C3C([H])=C([H])C([H])=C([H])C=3[H])=O)C([H])=C([H])C=2[H])=O)OC1([H])[H])=O	Inactive
C([H])([H])([H])N1C2C([H])=NC3C(C=2N(C2C([H])=C(C(F)(F)F)C([H])=C([H])C=2[H])C1=O)=C([H])C(C1C([H])=C([H])C(F)=C([H])C=1[H])=C([H])C=3[H]	Inactive
C([H])([H])([H])OC1C2=C(N=C(C3N2C([H])=C([H])C=3[H])C([H])=C([H])C([H])=C([H])C([H])([H])[H])C([H])=C([H])C=1[H]	Inactive
C([H])([H])([H])C([H])(N1C([H])([H])C([H])([H])C([H])(OC2C(C3=NC(C([H])([H])C4=C(C([H])([H])[H])N(C([H])([H])[H])N=C4C([H])([H])[H])=NO3)=C([H])C([H])=C([H])N=2)C([H])([H])C1([H])[H])C([H])([H])[H]	Inactive
C([H])([H])([H])N1N=C(C([H])([H])N([H])C2N=C([H])C(C3N4C(C([H])=C([H])C(=N4)N([H])C4([H])C([H])([H])C([H])([H])C([H])(N([H])[H])C([H])([H])C4([H])[H])=NC=3[H])=C([H])N=2)C([H])=C1[H]	Inactive
O([H])C(C1=C(C2C([H])=C([H])C(Br)=C([H])C=2[H])N(C([H])([H])C2C([H])=C([H])C([H])=C([H])C=2[H])N=N1)(C1C([H])=C([H])C(Cl)=C([H])C=1[H])C([H])([H])N([H])C1C([H])=C([H])C(F)=C([H])C=1[H]	Inactive
C([H])([H])([H])C([H])(C([H])([H])C([H])(C([H])(C([H])([H])C(N([H])C([H])([H])C([H])([H])C1C([H])=C([H])C([H])=C([H])C=1[H])=O)O[H])N([H])C(C([H])(C([H])(C([H])([H])[H])C([H])([H])[H])N([H])C(C([H])(N([H])C(OC([H])([H])C1C([H])=C([H])C([H])=C([H])C=1[H])=O)C([H])([H])C([H])([H])C([H])([H])N([H])C(N([H])[H])=N[H])=O)=O)C([H])([H])[H]	Inactive
C([H])([H])([H])C([H])([H])C([H])([H])C([H])=C([H])C([H])=C([H])C1C2N(C([H])=C([H])C=2[H])C2C(=C([H])C([H])=C(C=2[H])OC([H])([H])[H])N=1	Inactive
C([H])([H])([H])OC1C([H])=C2N=C(C3N(C2=C([H])C=1[H])C([H])=C([H])C=3[H])C([H])=C([H])C([H])=C([H])C([H])([H])[H]	Inactive
O([H])C(C1=C(C2C([H])=C([H])C([H])=C([H])C=2[H])N(C([H])([H])C2C([H])=C([H])C([H])=C([H])C=2[H])N=N1)(C1C([H])=C([H])C(Cl)=C([H])C=1[H])C([H])([H])N([H])C1C([H])=C([H])C(F)=C([H])C=1[H]	Inactive
C([H])([H])([H])C([H])(C([H])([H])C([H])(C([H])(C([H])([H])C(N([H])C([H])([H])C([H])([H])C1C([H])=C([H])C([H])=C([H])C=1[H])=O)O[H])N([H])C(C([H])(C([H])(C([H])([H])[H])C([H])([H])[H])N([H])C(C([H])(N([H])C(OC([H])([H])C1C([H])=C([H])C([H])=C([H])C=1[H])=O)C([H])([H])C([H])([H])C(N([H])C(N([H])[H])=N[H])=O)=O)=O)C([H])([H])[H]	Inactive
C([H])([H])([H])C([H])([H])N1C(=O)C2(C([H])([H])C([H])([H])N(C([H])([H])C3C4=C(C([H])=C([H])N4[H])C([H])=C([H])C=3[H])C([H])([H])C2([H])[H])N(C([H])([H])C([H])([H])C([H])(C([H])([H])[H])C([H])([H])[H])C1=O	Inactive
C([H])([H])([H])N(C(N1N=C(S(C2([H])C3([H])C([H])([H])C([H])(C([H])([H])C3([H])[H])C2([H])[H])(=O)=O)N=C1[H])=O)C([H])([H])C1C([H])=C(C#N)C([H])=C([H])C=1[H]	Inactive
O([H])C1([H])C([H])(O[H])C([H])(O[H])C([H])(C([H])([H])C(C([H])=C([H])C2C([H])=C(N([H])C(N([H])C3C([H])=C([H])C([H])=C([H])C=3[H])=O)C([H])=C([H])C=2[H])=O)OC1([H])[H]	Inactive
C([H])([H])(C1([H])C([H])(OC([H])([H])C2C([H])=C([H])C([H])=C([H])C=2[H])C([H])(OC([H])([H])C2C([H])=C([H])C([H])=C([H])C=2[H])C2([H])C([H])([H])SC3C(C2([H])O1)=C([H])C([H])=C([H])C=3[H])OC([H])([H])C1C([H])=C([H])C([H])=C([H])C=1[H]	Inactive
N([H])(C1C2C(=C([H])C([H])=C([H])C=2[H])C([H])=NN=1)N=C([H])C1C2C(=C([H])C([H])=C([H])C=2[H])N([H])C=1C1C([H])=C([H])C([H])=C([H])C=1[H]	Inactive
C([H])([H])([H])N1C(C([H])=NN([H])C2C3C(=C([H])C([H])=C([H])C=3[H])C([H])=NN=2)=NC([H])=C1[H]	Inactive
C([H])([H])([H])C1C(C2C(=O)N(O[H])C3C(=C([H])C(=C([H])C=3[H])O[H])C=2[H])=C([H])C([H])=C([H])C=1[H]	Inactive
C([H])([H])([H])OC1C([H])=C(C([H])([H])C2N=C(C3C(OC4([H])C([H])([H])C([H])([H])N([H])C([H])([H])C4([H])[H])=NC([H])=C([H])C=3[H])ON=2)C([H])=C([H])C=1[H]	Inactive
C([H])([H])([H])C([H])([H])N1C(=O)C2(C([H])([H])C([H])([H])N(C([H])([H])C3C(O[H])=C([H])C([H])=C(Cl)C=3[H])C([H])([H])C2([H])[H])N(C2C([H])=C([H])C([H])=C([H])C=2[H])C1=O	Inactive
C([H])([H])([H])C1C(C2C(=O)N(O[H])C3C(=C4C(=C([H])C=3[H])OC([H])([H])O4)C=2[H])=C([H])C([H])=C([H])C=1[H]	Inactive
C([H])([H])([H])N1C2C([H])=NC3C(C=2N(C2C([H])=C(C(F)(F)F)C([H])=C([H])C=2[H])C1=O)=C([H])C([H])=C([H])C=3[H]	Inactive
C([H])([H])([H])C(C([H])([H])[H])=C([H])C([H])([H])C([H])([H])C(C([H])([H])[H])=C([H])C([H])([H])OC1C([H])=C([H])C(C([H])=C([H])C(C2C(O[H])=C([H])C(O[H])=C([H])C=2[H])=O)=C([H])C=1[H]	Inactive
C([H])([H])([H])C1C(C([H])([H])C2N=C(C3C(OC4([H])C([H])([H])C([H])([H])N([H])C([H])([H])C4([H])[H])=NC([H])=C([H])C=3[H])ON=2)=C(C([H])([H])[H])N(C([H])([H])[H])N=1	Inactive
O([H])C([H])([H])C1([H])C([H])(O[H])C([H])(O[H])C([H])(O[H])C([H])(C([H])([H])C(C([H])=C([H])C2C([H])=C(N([H])C(N([H])C3C([H])=C([H])C([H])=C([H])C=3[H])=O)C([H])=C([H])C=2[H])=O)O1	Inactive
O=C(N1C([H])([H])C([H])([H])C([H])(C([H])([H])C2C([H])=C([H])C([H])=C([H])C=2[H])C([H])([H])C1([H])[H])C([H])(N1C(=O)C2C(=C([H])C([H])=C([H])C=2[H])C1=O)C([H])([H])C1C([H])=C([H])C([H])=C([H])C=1[H]	Inactive
O=C(C1C([H])=NC([H])=C([H])C=1[H])N1C([H])([H])C([H])([H])C([H])(C2C3C(=C([H])C([H])=C([H])C=3[H])N([H])C=2[H])C([H])([H])C1([H])[H]	Inactive
C([H])([H])([H])N([H])C(C([H])([H])C([H])([H])C([H])([H])C([H])([H])C([H])([H])C([H])(C1N([H])C(C2C([H])=C3C(C([H])=C([H])C([H])=N3)=C([H])C=2[H])=C([H])N=1)N([H])C(C1SC([H])=NC=1[H])=O)=O	Inactive
C([H])([H])([H])OC1C([H])=C([H])C(C([H])(C2N(C(C([H])([H])[H])(C([H])([H])[H])C([H])([H])[H])N=NN=2)N([H])C([H])([H])C([H])([H])N([H])C2C3C(=C([H])C(=C([H])C=3[H])Cl)N=C([H])C=2[H])=C([H])C=1[H]	Inactive
N([H])([H])C1N(C2([H])C([H])([H])C([H])([H])C([H])([H])C([H])([H])C2([H])[H])C(=O)C(C2C([H])=C([H])C([H])=C([H])C=2[H])(C2C([H])=C([H])C([H])=C([H])C=2[H])N=1	Inactive
O([H])C(C1=C(C2C([H])=C([H])C(F)=C([H])C=2[H])N(C([H])([H])C2C([H])=C([H])C([H])=C([H])C=2[H])N=N1)(C1C([H])=C([H])C(Cl)=C([H])C=1[H])C([H])([H])N([H])C1C([H])=C([H])C(F)=C([H])C=1[H]	Inactive
FC1C([H])=C(SC([H])([H])C(C2C3C(=C([H])C([H])=C([H])C=3[H])N([H])C=2[H])=O)C([H])=C([H])C=1[H]	Inactive
N([H])([H])C1N(C([H])([H])C2([H])OC([H])(C3C([H])=C([H])C([H])=C([H])C=3[H])C([H])([H])C2([H])[H])C(=O)C2C(=C([H])C(C3C([H])=C([H])C(C([H])([H])C([H])([H])C([H])([H])C([H])([H])C4C([H])=C([H])C([H])=C([H])C=4[H])=C([H])C=3[H])=C([H])C=2[H])N=1	Inactive
C([H])([H])([H])C([H])([H])OC(C1C(=O)C2C(=C([H])C([H])=C3C=2N=C(C2C([H])=C([H])C(F)=C([H])C=2[H])C(C2C([H])=C([H])C(F)=C([H])C=2[H])=N3)N(C([H])([H])C(F)(F)F)C=1[H])=O	Inactive
C([H])([H])([H])C([H])([H])N1C2C([H])=NC3C(C=2N(C2C([H])=C(C(F)(F)F)C([H])=C([H])C=2[H])C1=O)=C([H])C(C1C([H])=C([H])C(Cl)=C([H])C=1[H])=C([H])C=3[H]	Inactive
C([H])([H])([H])C([H])([H])N1C(=O)C(C2C([H])=C([H])C(OC([H])([H])[H])=C([H])C=2[H])(C2C([H])=C([H])C(OC([H])([H])[H])=C([H])C=2[H])N([H])C1=N[H]	Inactive
C([H])([H])([H])C([H])(C([H])([H])C([H])(C([H])(C([H])([H])C(N([H])C([H])([H])C([H])([H])C1C([H])=C([H])C([H])=C([H])C=1[H])=O)O[H])N([H])C(C([H])(C([H])(C([H])([H])[H])C([H])([H])[H])N([H])C(C([H])(N([H])C(OC([H])([H])C1C([H])=C([H])C([H])=C([H])C=1[H])=O)C([H])([H])C([H])([H])C([H])([H])N([H])C(N([H])O[H])=N[H])=O)=O)C([H])([H])[H]	Inactive
ClC1C([H])=C2C(C(N3C([H])([H])C([H])([H])N(C4C([H])=C([H])C([H])=C([H])C=4[H])C([H])([H])C([H])([H])C3([H])[H])=C([H])C([H])=N2)=C([H])C=1[H]	Inactive
C([H])([H])([H])C([H])([H])C([H])(C1([H])C(=O)N([H])C([H])(C([H])([H])C2C([H])=C([H])C([H])=C([H])C=2[H])C(=O)N([H])C([H])([H])C(=O)N([H])C([H])(C([H])([H])C2C([H])=C([H])C([H])=C([H])C=2[H])C(=O)N([H])C([H])([H])C2C([H])=C(C([H])=C([H])C=2[H])C(=O)N([H])C([H])(C([H])(O[H])C([H])([H])[H])C(=O)N([H])C([H])(C([H])(C([H])([H])C([H])([H])[H])C([H])([H])[H])C(=O)N1[H])C([H])([H])[H]	Inactive
C([H])([H])([H])C([H])([H])C12OC([H])([H])C34C(C([H])([H])[H])(C([H])([H])C([H])([H])C3([H])C(O1)(C([H])([H])[H])C([H])([H])C2([H])[H])C1C([H])(OC(C([H])([H])[H])=O)C([H])([H])C([H])(C(C([H])([H])[H])=C([H])[H])C(C=1C(=O)C4([H])[H])(C([H])([H])C([H])([H])C(OC([H])([H])[H])=O)C([H])([H])[H]	Inactive
N([H])([H])C(C([H])([H])C([H])(C1C([H])=C2C(C([H])=C([H])C([H])=C2[H])=C([H])C=1[H])O[H])=NN=C([H])C1C(F)=C([H])C(F)=C([H])C=1[H]	Inactive
N([H])([H])C1C2C(=C([H])C([H])=C(C=2[H])Cl)N=C2C=1C([H])([H])C([H])([H])C([H])([H])C2([H])[H]	Inactive
FC(C1C([H])=C(N2C3C(=C([H])N=C4C=3C([H])=C(C3C([H])=C([H])C([H])=C([H])C=3[H])C([H])=C4[H])N([H])C2=O)C([H])=C([H])C=1[H])(F)F	Inactive
C([H])([H])([H])OC1C([H])=C([H])C(C2(C(=O)N(C3([H])C([H])([H])C3([H])[H])C(=N[H])N2[H])C2C([H])=C([H])C(OC([H])([H])[H])=C([H])C=2[H])=C([H])C=1[H]	Inactive
C([H])([H])([H])C1C2=C(C3([H])C([H])(C([H])([H])S2([H])O[H])C([H])(OC([H])([H])C2C([H])=C([H])C([H])=C([H])C=2[H])C([H])(OC([H])([H])C2C([H])=C([H])C([H])=C([H])C=2[H])C([H])(C([H])([H])OC([H])([H])C2C([H])=C([H])C([H])=C([H])C=2[H])O3)C([H])=C([H])C=1[H]	Inactive
O=S1(C2C(=C([H])C([H])=C([H])C=2[H])C2([H])C([H])(C([H])(C([H])(C([H])(O2)C([H])([H])OC([H])([H])C2C([H])=C([H])C([H])=C([H])C=2[H])OC([H])([H])C2C([H])=C([H])C([H])=C([H])C=2[H])OC([H])([H])C2C([H])=C([H])C([H])=C([H])C=2[H])C1([H])[H])=O	Inactive
C([H])([H])([H])C(OC1([H])C([H])(OC(C([H])([H])[H])=O)C([H])(OC(C([H])([H])[H])=O)C([H])(C([H])([H])C(C([H])=C([H])C2C([H])=C(N([H])C(N([H])C3C([H])=C([H])C([H])=C([H])C=3[H])=S)C([H])=C([H])C=2[H])=O)OC1([H])[H])=O	Inactive
O([H])N1C2C(=C([H])C3=C(C=2[H])OC([H])([H])O3)C([H])=C(C2C3C(=C([H])C([H])=C([H])C=3[H])C([H])=C([H])C=2[H])C1=O	Inactive
C([H])([H])([H])C1C(C2C(=O)N(O[H])C3C(=C([H])C4=C(C=3[H])OC([H])([H])O4)C=2[H])=C([H])C([H])=C([H])C=1[H]	Inactive
C([H])([H])([H])C1C(C2C(=O)N(O[H])C3C(=C([H])C(=C([H])C=3[H])F)C=2[H])=C([H])C([H])=C([H])C=1[H]	Inactive
C([H])([H])([H])N([H])C(C([H])([H])C([H])([H])C([H])([H])C([H])([H])C([H])([H])C([H])(C1N([H])C(C2C([H])=C3C(C([H])=C([H])N=C3OC([H])([H])[H])=C([H])C=2[H])=C([H])N=1)N([H])C(C1SC([H])=NC=1[H])=O)=O	Inactive
C([H])([H])([H])OC1C(OC([H])([H])[H])=C([H])C2=C(C([H])=C(C3C4C(=C([H])C([H])=C([H])C=4[H])C([H])=C([H])C=3[H])C(N2O[H])=O)C=1[H]	Inactive
C([H])([H])([H])C1C(C2C(=O)N(O[H])C3C(=C(C([H])=C([H])C=3[H])F)C=2[H])=C([H])C([H])=C([H])C=1[H]	Inactive
FC(C1C([H])=C(N2C3C(=C([H])N=C4C=3C([H])=C([H])C([H])=C4[H])N([H])C2=O)C([H])=C([H])C=1[H])(F)F	Inactive
C([H])([H])([H])C1C([H])=C([H])C(C2C([H])=C3C(N=C([H])C4=C3N(C3C([H])=C(C(F)(F)F)C([H])=C([H])C=3[H])C(=O)N4[H])=C([H])C=2[H])=C([H])C=1[H]	Inactive
C([H])([H])([H])C([H])(C([H])([H])C([H])(C(N([H])C([H])(C1C([H])=C([H])C([H])=C([H])C=1[H])C(N1C(C([H])([H])OC2C([H])=C([H])C(F)=C([H])C=2[H])=NC([H])([H])C1([H])[H])=O)=O)N([H])C(C([H])(N([H])C(N1C([H])([H])C([H])([H])C([H])([H])C([H])([H])C1([H])[H])=O)C([H])([H])C([H])(C([H])([H])[H])C([H])([H])[H])=O)C([H])([H])[H]	Inactive
C([H])([H])([H])C(OC([H])([H])C1([H])C([H])(OC(C([H])([H])[H])=O)C([H])(OC(C([H])([H])[H])=O)C([H])(OC(C([H])([H])[H])=O)C([H])(C([H])([H])C(C([H])=C([H])C2C([H])=C([H])C(N([H])C(N([H])C3C([H])=C([H])C([H])=C([H])C=3[H])=O)=C([H])C=2[H])=O)O1)=O	Inactive
C([H])([H])([H])N1C2C([H])=NC3C(C=2N(C2C([H])=C(C(F)(F)F)C([H])=C([H])C=2[H])C1=O)=C([H])C(C1C([H])=C2C(C([H])=C([H])C([H])=C2[H])=NC=1[H])=C([H])C=3[H]	Inactive
O([H])N=C1C2C(=C([H])C([H])=C([H])C=2[H])C2C3C(N=C(C1=2)N([H])C([H])([H])C([H])([H])N1C([H])([H])C([H])([H])OC([H])([H])C1([H])[H])=C([H])C(Cl)=C([H])C=3[H]	Inactive
C([H])([H])([H])C([H])(C([H])([H])C([H])(C(N([H])C([H])(C(N1C(C([H])([H])OC2C([H])=C([H])C(F)=C([H])C=2[H])=NC([H])([H])C1([H])[H])=O)C([H])([H])C1C2C(=C([H])C([H])=C([H])C=2[H])N([H])C=1[H])=O)N([H])C(C([H])(N([H])C(N1C([H])([H])C([H])([H])C([H])([H])C([H])([H])C1([H])[H])=O)C([H])([H])C([H])(C([H])([H])[H])C([H])([H])[H])=O)C([H])([H])[H]	Inactive
C([H])([H])([H])OC1C(OC([H])([H])[H])=C([H])C2=C(C([H])=C(C3C(C([H])([H])[H])=C([H])C([H])=C([H])C=3[H])C(N2O[H])=O)C=1[H]	Inactive
O([H])C([H])([H])C1([H])C([H])(O[H])C([H])(O[H])C([H])(O[H])C([H])(OC2C(=O)C3C(=C([H])C(=C([H])C=3O[H])O[H])OC=2C2C([H])=C(O[H])C(O[H])=C([H])C=2[H])O1	Inactive
C([H])([H])([H])C([H])(C([H])([H])C([H])(C([H])(C([H])([H])C(N([H])C([H])([H])C([H])([H])C1C([H])=C([H])C([H])=C([H])C=1[H])=O)O[H])N([H])C(C([H])(N(C(C([H])(N([H])C(OC([H])([H])C1C([H])=C([H])C([H])=C([H])C=1[H])=O)C([H])([H])C([H])([H])C([H])([H])N([H])C(N([H])[H])=N[H])=O)C([H])([H])[H])C([H])(C([H])([H])[H])C([H])([H])[H])=O)C([H])([H])[H]	Inactive
O([H])N1C2C(=C([H])C([H])=C([H])C=2[H])C([H])=C(C2C(C(F)(F)F)=C([H])C([H])=C([H])C=2[H])C1=O	Inactive
O([H])C([H])([H])C1([H])C([H])(O[H])C([H])(O[H])C([H])(O[H])C([H])(C([H])([H])C(C([H])=C([H])C2C([H])=C([H])C(N([H])C(N([H])C3C([H])=C4C(C([H])=C([H])C([H])=C4[H])=C([H])C=3[H])=O)=C([H])C=2[H])=O)O1	Inactive
C([H])([H])([H])C(C([H])([H])[H])=C([H])C([H])([H])C([H])([H])C(C([H])([H])[H])=C([H])C([H])([H])N([H])C([H])([H])C([H])([H])OC1([H])C2(C(C([H])(C([H])([H])C2([H])[H])C1([H])[H])(C([H])([H])[H])C([H])([H])[H])C([H])([H])[H]	Inactive
C([H])([H])([H])C([H])([H])N1C(=O)C2(C([H])([H])C([H])([H])N(C([H])([H])C3C(O[H])=C(OC([H])([H])[H])C([H])=C([H])C=3[H])C([H])([H])C2([H])[H])N(C([H])([H])C([H])([H])C([H])(C([H])([H])[H])C([H])([H])[H])C1=O	Inactive
C([H])([H])([H])C([H])([H])C([H])([H])C([H])([H])C([H])=C([H])C([H])=C([H])C1C2N(C([H])=C([H])C=2[H])C2C(=C([H])C([H])=C([H])C=2[H])N=1	Inactive
ClC1C([H])=C2C(N=C([H])C([H])=C2N2C([H])([H])C([H])([H])C([H])(C3C4C(=C([H])C([H])=C([H])C=4[H])N([H])C=3[H])C([H])([H])C2([H])[H])=C([H])C=1[H]	Inactive
C([H])([H])([H])C([H])(C1C(O[H])=C([H])C2=C(C([H])([H])C([H])([H])C3([H])C2(C([H])([H])[H])C([H])([H])C([H])([H])C([H])([H])C3(C([H])([H])N([H])[H])C([H])([H])[H])C=1[H])C([H])([H])[H]	Inactive
C([H])([H])([H])OC(C1([H])C([H])([H])C([H])([H])N(C([H])([H])C(N([H])C([H])(C(N([H])C([H])(C(N([H])C([H])(C(N2C([H])(C([H])([H])OC3C([H])=C([H])C(F)=C([H])C=3[H])C([H])([H])C([H])([H])C2([H])[H])=O)C([H])([H])C2C3C(=C([H])C([H])=C([H])C=3[H])N([H])C=2[H])=O)C([H])([H])C([H])(C([H])([H])[H])C([H])([H])[H])=O)C([H])([H])C([H])(C([H])([H])[H])C([H])([H])[H])=O)C([H])([H])C1([H])[H])=O	Inactive
C([H])([H])([H])C([H])([H])N1C(=O)C2(C([H])([H])C([H])([H])N(C([H])([H])C3C(O[H])=C([H])C([H])=C(Cl)C=3[H])C([H])([H])C2([H])[H])N(C([H])([H])C([H])([H])[H])C1=O	Inactive
C([H])([H])([H])C([H])(C([H])([H])C([H])(C(N([H])C([H])(C(N([H])C([H])(C(N1C([H])(C([H])([H])OC2C([H])=C([H])C(F)=C([H])C=2[H])C([H])([H])C([H])([H])C1([H])[H])=O)C([H])([H])C1C2C(=C([H])C([H])=C([H])C=2[H])N([H])C=1[H])=O)C([H])([H])C([H])(C([H])([H])[H])C([H])([H])[H])=O)N([H])C(C([H])([H])N1C([H])([H])C([H])([H])C([H])(C([H])([H])C([H])([H])O[H])C([H])([H])C1([H])[H])=O)C([H])([H])[H]	Inactive
ClC1C([H])=C2C(C3=C(C(=N2)N([H])C([H])([H])C([H])([H])N2C([H])([H])C([H])([H])OC([H])([H])C2([H])[H])C(=O)C2C3=C([H])C([H])=C([H])C=2[H])=C([H])C=1[H]	Inactive
C([H])([H])([H])OC1C(OC([H])([H])[H])=C([H])C(C([H])(P(O[H])(O[H])=O)C([H])([H])C([H])([H])C(N([H])O[H])=O)=C([H])C=1[H]	Inactive
C([H])([H])([H])C([H])([H])C([H])(C([H])(C(N([H])C([H])(C([H])(C([H])([H])C(N([H])C1([H])C([H])([H])C([H])([H])C([H])([H])C([H])([H])C1([H])[H])=O)O[H])C([H])([H])C([H])(C([H])([H])[H])C([H])([H])[H])=O)N([H])C(C([H])(N([H])C(OC([H])([H])C1C([H])=C([H])C([H])=C([H])C=1[H])=O)C([H])([H])C([H])([H])C([H])([H])N([H])C(N([H])[H])=N[H])=O)C([H])([H])[H]	Inactive
C([H])([H])([H])N1C(=O)C(C2C([H])=C(C3C([H])=NC([H])=C([H])C=3[H])C([H])=C([H])C=2[H])(C2C([H])=C([H])C([H])=C([H])C=2[H])N([H])C1=N[H]	Inactive
O([H])C1([H])C([H])(O[H])C([H])(O[H])C([H])(C([H])([H])C(C([H])=C([H])C2C([H])=C(N([H])C(N([H])C3C([H])=C([H])C([H])=C([H])C=3[H])=S)C([H])=C([H])C=2[H])=O)OC1([H])[H]	Inactive
C([H])([H])([H])C([H])([H])OC(C1C(=O)C2C(=C([H])C([H])=C3C=2N=C(C2C([H])=C([H])C([H])=C([H])C=2[H])C(C2C([H])=C([H])C([H])=C([H])C=2[H])=N3)N(C([H])([H])C2C([H])=C([H])C(F)=C([H])C=2[H])C=1[H])=O	Inactive
C([H])([H])([H])N1C2C([H])=NC3C(C=2N(C2C([H])=C(C(F)(F)F)C([H])=C([H])C=2[H])C1=O)=C([H])C(C1C([H])=C([H])C(C#N)=C([H])C=1[H])=C([H])C=3[H]	Inactive
O([H])C([H])([H])C1([H])C([H])(O[H])C([H])(O[H])C([H])(O[H])C([H])(C([H])([H])C(C([H])=C([H])C2C([H])=C([H])C(N([H])C(N([H])C3C([H])=C([H])C([H])=C([H])C=3[H])=O)=C([H])C=2[H])=O)O1	Inactive
C([H])([H])([H])N([H])C(C([H])([H])C([H])([H])C([H])([H])C([H])([H])C([H])([H])C([H])(C1N([H])C(C2C([H])=C([H])C(C3C([H])=C([H])C([H])=C([H])C=3[H])=C([H])C=2[H])=C([H])N=1)N([H])C(C1SC([H])=NC=1[H])=O)=O	Inactive
C([H])([H])([H])C([H])([H])OC(C1C(=O)C2C(=C([H])C([H])=C3C=2N=C(C2C([H])=C([H])C(F)=C([H])C=2[H])C(C2C([H])=C([H])C(F)=C([H])C=2[H])=N3)N(C([H])([H])C2C([H])=C([H])C(F)=C([H])C=2[H])C=1[H])=O	Inactive
C([H])([H])([H])C([H])([H])N1C(=O)C2(C([H])([H])C([H])([H])N(C([H])([H])C3C(OC([H])([H])[H])=C([H])C(OC([H])([H])[H])=C([H])C=3[H])C([H])([H])C2([H])[H])N(C([H])([H])C([H])([H])C([H])(C([H])([H])[H])C([H])([H])[H])C1=O	Inactive
C([H])([H])([H])OC1C(C2C(=O)N(O[H])C3C(=C([H])C([H])=C([H])C=3[H])C=2[H])=C([H])C([H])=C([H])C=1[H]	Inactive
C([H])([H])([H])C([H])([H])OC1=C2N(C3C(N=C2C([H])=C([H])C([H])=C([H])C([H])([H])[H])=C([H])C([H])=C([H])C=3[H])C([H])=C1[H]	Inactive
O=C(C1C2C(=C([H])C([H])=C([H])C=2[H])N([H])C=1[H])C([H])([H])SC([H])([H])C([H])([H])C1C([H])=C([H])C([H])=C([H])C=1[H]	Inactive
C([H])([H])([H])C([H])([H])C12OC([H])([H])C34C(C([H])([H])[H])(C([H])([H])C([H])([H])C3([H])C(O1)(C([H])([H])[H])C([H])([H])C2([H])[H])C1C(=O)C([H])([H])C([H])(C(C([H])([H])[H])=C([H])[H])C(C=1C(=O)C4([H])[H])(C([H])([H])C([H])([H])C(OC([H])([H])[H])=O)C([H])([H])[H]	Inactive
C([H])([H])([H])OC1C([H])=C([H])C(C2(C(=O)N(C([H])([H])[H])C(=N[H])N2[H])C2C([H])=C([H])C(OC([H])([H])[H])=C([H])C=2[H])=C([H])C=1[H]	Inactive
C([H])([H])([H])OC(C1([H])N([H])C([H])(C2C(C([H])([H])O[H])=C([H])N=C(C([H])([H])[H])C=2O[H])C2N([H])C3C(C=2C1([H])[H])=C([H])C([H])=C([H])C=3[H])=O	Inactive
C([H])([H])([H])C([H])(C1([H])C2(C([H])(C3([H])C([H])(C([H])([H])C2([H])[H])C2(C([H])(C([H])([H])C([H])(OC(C([H])([H])[H])=O)C([H])([H])C2([H])[H])C([H])(OC(C([H])([H])[H])=O)C3([H])OC(C([H])([H])[H])=O)C([H])([H])[H])C([H])([H])C1([H])[H])C([H])([H])[H])C([H])([H])C([H])([H])C(O[H])=O	Inactive
C([H])([H])([H])N([H])C(C([H])([H])C([H])([H])C([H])([H])C([H])([H])C([H])([H])C([H])(C1N([H])C(C2C3C(=C([H])C([H])=C([H])N=3)C([H])=C([H])C=2[H])=C([H])N=1)N([H])C(C1SC([H])=NC=1[H])=O)=O	Inactive
N([H])=C1N(C([H])([H])C2C([H])=C([H])C([H])=C([H])C=2[H])C(=O)C(C2C([H])=C([H])C([H])=C([H])C=2[H])(C2C([H])=C([H])C([H])=C([H])C=2[H])N1[H]	Inactive
C([H])([H])([H])C([H])([H])OC(C([H])=C([H])C1C([H])=C(N([H])C(N([H])C2C([H])=C([H])C([H])=C([H])C=2[H])=O)C([H])=C([H])C=1[H])=O	Inactive
C([H])([H])([H])C([H])([H])C([H])([H])C([H])([H])OC1C([H])=C([H])C(C(C([H])=C([H])C2C(OC([H])([H])[H])=C([H])C(OC([H])([H])[H])=C([H])C=2[H])=O)=C([H])C=1[H]	Inactive
C([H])([H])([H])C([H])([H])C([H])([H])C([H])([H])C([H])=C([H])C([H])=C([H])C1C2N(C([H])=C([H])C=2[H])C2C(=C([H])C(=C([H])C=2[H])OC([H])([H])[H])N=1	Inactive
C([H])([H])([H])C(C1C([H])=C([H])C(SC([H])([H])C(C2C3C(=C([H])C([H])=C([H])C=3[H])N([H])C=2[H])=O)=C([H])C=1[H])(C([H])([H])[H])C([H])([H])[H]	Inactive
C([H])([H])([H])C([H])(C([H])([H])C([H])(C([H])(C([H])([H])C(N([H])C1([H])C([H])([H])C([H])([H])C([H])([H])C([H])([H])C1([H])[H])=O)O[H])N([H])C(C([H])(N([H])C(C([H])(N([H])C(OC([H])([H])C1C([H])=C([H])C([H])=C([H])C=1[H])=O)C([H])([H])C([H])([H])C([H])([H])N([H])C(N([H])[H])=N[H])=O)C([H])([H])C([H])(C([H])([H])[H])C([H])([H])[H])=O)C([H])([H])[H]	Inactive
C([H])([H])([H])C([H])([H])C([H])(C1([H])C(=O)N([H])C([H])(C([H])([H])C([H])([H])SC([H])([H])[H])C(=O)N([H])C([H])([H])C(=O)N([H])C([H])(C([H])(C([H])([H])C([H])([H])[H])C([H])([H])[H])C(=O)N2C([H])(C([H])([H])C([H])([H])C2([H])[H])C(=O)N([H])C([H])(C([H])(C([H])([H])C([H])([H])[H])C([H])([H])[H])C(=O)N([H])C([H])(C([H])([H])C([H])(C([H])([H])[H])C([H])([H])[H])C(=O)N([H])C([H])(C([H])([H])[H])C(…	Inactive
O([H])C(C1=C(C2C([H])=C([H])C(F)=C([H])C=2[H])N(C([H])([H])C2C([H])=C([H])C([H])=C([H])C=2[H])N=N1)(C1C([H])=C([H])C(Cl)=C([H])C=1[H])C([H])([H])N([H])C1C(Br)=C([H])C([H])=C([H])C=1[H]	Inactive
C([H])([H])([H])C([H])([H])C([H])([H])C([H])([H])N1C2C([H])=C([H])C3C(C=2C(=O)C(C(OC([H])([H])C([H])([H])[H])=O)=C1[H])=NC(C1C([H])=C([H])C([H])=C([H])C=1[H])=C(C1C([H])=C([H])C([H])=C([H])C=1[H])N=3	Inactive
C([H])([H])([H])OC1C(OC([H])([H])[H])=C(OC([H])([H])[H])C([H])=C(C2([H])C3C(=C([H])C4=C(C=3[H])OC([H])([H])O4)C([H])(O[H])C3([H])C([H])([H])OC(C23[H])=O)C=1[H]	Inactive
O([H])C([H])([H])C1([H])C([H])(O[H])C([H])(O[H])C([H])(O[H])C([H])(C([H])([H])C(C([H])=C([H])C2C([H])=C(N([H])C(N([H])C3C([H])=C([H])C([H])=C([H])C=3[H])=S)C([H])=C([H])C=2[H])=O)O1	Inactive
C([H])([H])([H])C([H])(C([H])([H])C([H])(C(N([H])C([H])(C(N1C([H])(C([H])([H])OC2C([H])=C([H])C(F)=C([H])C=2[H])C([H])([H])C([H])([H])C1([H])[H])=O)C([H])([H])C1C2C(=C([H])C([H])=C([H])C=2[H])N([H])C=1[H])=O)N([H])C(C([H])(N([H])C(N1C([H])([H])C([H])([H])C([H])([H])C([H])([H])C1([H])[H])=O)C([H])([H])C([H])(C([H])([H])[H])C([H])([H])[H])=O)C([H])([H])[H]	Inactive
C([H])([H])([H])C([H])([H])C([H])([H])C([H])([H])C([H])=C([H])C([H])=C([H])C1C2N(C([H])=C([H])C=2[H])C2C(=C([H])C([H])=C([H])C=2OC([H])([H])[H])N=1	Inactive
C([H])([H])([H])C([H])(C([H])([H])C([H])(C([H])(C([H])([H])C(N([H])C1([H])C([H])([H])C([H])([H])C([H])([H])C([H])([H])C1([H])[H])=O)O[H])N([H])C(C([H])(C([H])(C([H])([H])[H])C([H])([H])[H])N([H])C(C([H])(N([H])C(OC([H])([H])C1C([H])=C([H])C([H])=C([H])C=1[H])=O)C([H])([H])C([H])([H])C([H])([H])N([H])C(N([H])[H])=N[H])=O)=O)C([H])([H])[H]	Inactive
C([H])([H])([H])C([H])(C([H])([H])C([H])(C(N([H])C([H])(C(N([H])C([H])(C(N1C(C([H])([H])OC2C([H])=C([H])C(F)=C([H])C=2[H])=NC([H])([H])C1([H])[H])=O)C([H])([H])C1C2C(=C([H])C([H])=C([H])C=2[H])N([H])C=1[H])=O)C([H])([H])C([H])(C([H])([H])[H])C([H])([H])[H])=O)N([H])C(C([H])([H])N1C([H])([H])C([H])([H])C([H])(O[H])C([H])([H])C1([H])[H])=O)C([H])([H])[H]	Inactive
C([H])([H])([H])C1=C([H])C([H])=C(C(C([H])=C([H])C2C([H])=C([H])C(C(N([H])[H])=O)=C([H])C=2[H])=O)O1	Inactive
C([H])([H])([H])C([H])([H])C([H])([H])C([H])([H])N([H])C(C1C([H])=C([H])C(C([H])=C([H])C(C2=C([H])C([H])=C(C([H])([H])[H])O2)=O)=C([H])C=1[H])=O	Inactive
C([H])([H])([H])C([H])(C([H])([H])C([H])(C(N([H])C([H])(C(N1C([H])(C([H])([H])OC2C([H])=C([H])C(F)=C([H])C=2[H])C([H])([H])C([H])([H])C1([H])[H])=O)C([H])([H])C1C2C(=C([H])C([H])=C([H])C=2[H])N([H])C=1[H])=O)N([H])C(C([H])(N([H])C(N1C([H])([H])C([H])([H])OC([H])([H])C1([H])[H])=O)C([H])([H])C([H])(C([H])([H])[H])C([H])([H])[H])=O)C([H])([H])[H]	Inactive
C([H])([H])([H])N([H])C(C([H])([H])C([H])([H])C([H])([H])C([H])([H])C([H])([H])C([H])(C1N([H])C(C2C([H])=C3C(N([H])N=N3)=C([H])C=2[H])=C([H])N=1)N([H])C(C1SC([H])=NC=1[H])=O)=O	Inactive
C([H])([H])([H])C([H])=C([H])C([H])=C([H])C([H])=C([H])C1C2N(C([H])=C([H])C=2[H])C2C(=C([H])C([H])=C([H])C=2[H])N=1	Inactive
C([H])([H])([H])C([H])(C([H])([H])C([H])(C(N([H])C([H])(C(N1C([H])(C([H])([H])OC2C([H])=C([H])C(F)=C([H])C=2[H])C([H])([H])C([H])([H])C1([H])[H])=O)C([H])([H])C1C([H])=C([H])C([H])=C([H])C=1[H])=O)N([H])C(C([H])(N([H])C(N1C([H])([H])C([H])([H])OC([H])([H])C1([H])[H])=O)C([H])([H])C([H])(C([H])([H])[H])C([H])([H])[H])=O)C([H])([H])[H]	Inactive
C([H])([H])([H])C([H])([H])C([H])([H])C([H])([H])C([H])=C([H])C([H])=C([H])C1C2N(C([H])=C([H])C=2[H])C2C(=C([H])C([H])=C(C=2[H])OC([H])([H])[H])N=1	Inactive
C([H])([H])([H])C(C([H])([H])[H])=C([H])C([H])([H])C([H])([H])C(C([H])([H])[H])=C([H])C([H])([H])OC([H])([H])C(N([H])C1([H])C2([H])C([H])([H])C3([H])C([H])([H])C([H])(C([H])([H])C1([H])C3([H])[H])C2([H])[H])=O	Inactive
O([H])C(C1=C(C2C([H])=C([H])C(Br)=C([H])C=2[H])N(C([H])([H])C2C([H])=C([H])C([H])=C([H])C=2[H])N=N1)(C1C([H])=C([H])C(Cl)=C([H])C=1[H])C([H])([H])N([H])C1C(Br)=C([H])C([H])=C([H])C=1[H]	Inactive
C([H])([H])([H])C1([H])C2([H])C3([H])C(C([H])(C([H])([H])C2([H])[H])C([H])([H])[H])(N=C=S)C([H])([H])C([H])([H])C(C3([H])C([H])(C([H])([H])C(N=C=S)(C([H])([H])[H])C([H])([H])[H])C1([H])[H])=C([H])[H]	Inactive
O([H])C([H])([H])C1([H])C([H])(O[H])C([H])(O[H])C([H])(O[H])C([H])(C([H])([H])C(C([H])=C([H])C2C([H])=C([H])C(N([H])C(N([H])C3C([H])=C([H])C([H])=C([H])C=3[H])=S)=C([H])C=2[H])=O)O1	Inactive
C([H])([H])([H])C1C(SC([H])([H])C(C2C3C(=C([H])C([H])=C([H])C=3[H])N([H])C=2[H])=O)=C([H])C([H])=C([H])C=1[H]	Inactive
FC1C(Cl)=C([H])C2=C(C(C(C([H])([H])SC3C([H])=C([H])C(Br)=C([H])C=3[H])=O)=C([H])N2[H])C=1[H]	Inactive
C([H])([H])([H])N([H])C(C([H])([H])C([H])([H])C([H])([H])C([H])([H])C([H])([H])C([H])(C1N([H])C(C2C([H])=C3C(N([H])C([H])=N3)=C([H])C=2[H])=C([H])N=1)N([H])C(C1SC([H])=NC=1[H])=O)=O	Inactive
C([H])([H])([H])C1=C(C([H])=NN([H])C2C3C(=C([H])C([H])=C([H])C=3[H])C([H])=NN=2)C2C(=C([H])C([H])=C([H])C=2[H])N1[H]	Inactive
C([H])([H])([H])C(C([H])([H])[H])=C([H])C([H])([H])C1C2=C(C(C3C(O2)=C([H])C(O[H])=C(O[H])C=3C([H])([H])C([H])=C(C([H])([H])[H])C([H])([H])[H])=O)C(O[H])=C(O[H])C=1O[H]	Inactive
N([H])([H])C1C2C(=C([H])C([H])=C([H])C=2[H])N=C2C=1C([H])([H])C([H])([H])C([H])([H])C2([H])[H]	Inactive
C([H])([H])([H])N([H])C(N([H])C([H])([H])C([H])([H])C([H])([H])C([H])(C(N([H])C([H])(C(N([H])C([H])(C([H])(C([H])([H])C(N([H])C([H])([H])C([H])([H])C1C([H])=C([H])C([H])=C([H])C=1[H])=O)O[H])C([H])([H])C([H])(C([H])([H])[H])C([H])([H])[H])=O)C([H])(C([H])([H])[H])C([H])([H])[H])=O)N([H])C(OC([H])([H])C1C([H])=C([H])C([H])=C([H])C=1[H])=O)=N[H]	Inactive
O([H])C(C1C(=O)C2C(=C([H])C(=C(C=2[H])F)N2C([H])([H])C([H])([H])N([H])C([H])([H])C2([H])[H])N(C2([H])C([H])([H])C2([H])[H])C=1[H])=O	Inactive
C([H])([H])([H])N1C([H])([H])C2C(=C(C3=C(C=2C([H])([H])[H])C2C(=C([H])C([H])=C([H])C=2[H])N3[H])C([H])([H])[H])C([H])([H])C1([H])[H]	Inactive
C([H])([H])([H])C(C([H])([H])[H])=C([H])C([H])([H])C([H])([H])C(C([H])([H])[H])=C([H])C([H])([H])N([H])C([H])([H])C([H])([H])OC(C([H])([H])[H])(C([H])([H])[H])C([H])([H])[H]	Inactive
BrC1C([H])=C(C([H])([H])SC([H])([H])C(C2C3C(=C([H])C([H])=C([H])C=3[H])N([H])C=2[H])=O)C([H])=C([H])C=1[H]	Inactive
C([H])([H])([H])C([H])([H])OC(C1C(=O)C2C(=C([H])C([H])=C3C=2N=C(C2C([H])=C([H])C([H])=C([H])C=2[H])C(C2C([H])=C([H])C([H])=C([H])C=2[H])=N3)N(C([H])([H])C(F)(F)F)C=1[H])=O	Inactive
C([H])([H])([H])OC1C(OC([H])([H])[H])=C([H])C2=C(OC([H])([H])C3([H])C2(O[H])C(=O)C2C(=C4C(=C([H])C=2[H])OC(C([H])([H])[H])(C([H])([H])[H])C([H])=C4[H])O3)C=1[H]	Inactive
N([H])(C1C2C(=C([H])C([H])=C([H])C=2[H])C([H])=NN=1)N=C([H])C1C2C(=C([H])C([H])=C([H])C=2[H])N([H])C=1[H]	Inactive
O=C(N([H])C1C([H])=C([H])C([H])=C([H])C=1[H])N([H])C1C([H])=C([H])C([H])=C([H])C=1[H]	Inactive
C([H])([H])([H])C([H])([H])N1C(=O)C2(C([H])([H])C([H])([H])N(C([H])([H])C3C([H])=C(Cl)C([H])=C([H])C=3[H])C([H])([H])C2([H])[H])N(C([H])([H])C([H])([H])C([H])(C([H])([H])[H])C([H])([H])[H])C1=O	Inactive
O([H])N1C2C(=C([H])C([H])=C([H])C=2[H])C([H])=C(C2C([H])=C([H])C([H])=C([H])C=2[H])C1=O	Inactive
C([H])([H])([H])C([H])(C([H])([H])C([H])(C(N([H])C([H])(C(N([H])N([H])C1C([H])=C([H])C([H])=C([H])C=1[H])=O)C([H])([H])C1C([H])=C([H])C([H])=C([H])C=1[H])=O)N([H])C(C([H])(N([H])C(N1C([H])([H])C([H])([H])C([H])([H])C([H])([H])C1([H])[H])=O)C([H])([H])C([H])(C([H])([H])[H])C([H])([H])[H])=O)C([H])([H])[H]	Inactive
C([H])([H])([H])C1(OC2C(=C([H])C(=C([H])C=2[H])C([H])([H])C([H])([H])C(C2C(O[H])=C3C(OC(C([H])([H])C3([H])[H])(C([H])([H])[H])C([H])([H])[H])=C([H])C=2O[H])=O)C([H])([H])C1([H])[H])C([H])([H])[H]	Inactive
C([H])([H])([H])OC1C([H])=C([H])C(C2(C(=O)N(C3([H])C([H])([H])C([H])([H])C([H])(O[H])C([H])([H])C3([H])[H])C(=N[H])N2[H])C2C([H])=C([H])C(OC([H])([H])[H])=C([H])C=2[H])=C([H])C=1[H]	Inactive
C([H])([H])([H])N1C2C(=C([H])C([H])=C([H])C=2[H])C(C(C([H])([H])SC2C([H])=C([H])C(Br)=C([H])C=2[H])=O)=C1[H]	Inactive
C([H])([H])([H])C([H])(C1C(O[H])=C([H])C2=C(C([H])([H])C([H])([H])C3([H])C2(C([H])([H])[H])C([H])([H])C([H])([H])C([H])([H])C3(C([H])([H])N2C(=O)C3C(=C([H])C([H])=C([H])C=3[H])C2=O)C([H])([H])[H])C=1[H])C([H])([H])[H]	Inactive
C([H])([H])([H])C([H])(C1C(O[H])=C([H])C2=C(C([H])([H])C([H])([H])C3([H])C2(C([H])([H])[H])C([H])([H])C([H])([H])C([H])([H])C3(C([H])([H])N2C(=O)C3C(=C(C(=C(C=3Cl)Cl)Cl)Cl)C2=O)C([H])([H])[H])C=1[H])C([H])([H])[H]	Inactive
C([H])([H])([H])C([H])(C1C(OC(C([H])([H])[H])=O)=C([H])C2=C(C(C([H])([H])C3([H])C2(C([H])([H])[H])C([H])([H])C([H])([H])C([H])([H])C3(C([H])([H])N2C(=O)C3C(=C(C(=C(C=3Cl)Cl)Cl)Cl)C2=O)C([H])([H])[H])=NN([H])S(C2C([H])=C([H])C(C([H])([H])[H])=C([H])C=2[H])(=O)=O)C=1[H])C([H])([H])[H]	Inactive
C([H])([H])([H])C([H])(C1C(O[H])=C([H])C2=C(C([H])([H])C([H])([H])C3([H])C2(C([H])([H])[H])C([H])([H])C([H])([H])C([H])([H])C3(C([H])=O)C([H])([H])[H])C=1[H])C([H])([H])[H]	Inactive
C([H])([H])([H])C([H])(C1C(OC(C([H])([H])[H])=O)=C([H])C2=C(C(C([H])([H])C3([H])C2(C([H])([H])[H])C([H])([H])C([H])([H])C([H])([H])C3(C([H])([H])N2C(=O)C3C(=C(C(=C(C=3Cl)Cl)Cl)Cl)C2=O)C([H])([H])[H])=O)C=1[H])C([H])([H])[H]	Inactive
C([H])([H])([H])C([H])(C1C(OC(C([H])([H])[H])=O)=C([H])C2=C(C([H])([H])C([H])([H])C3([H])C2(C([H])([H])[H])C([H])([H])C([H])([H])C([H])([H])C3(C([H])([H])N2C(=O)C3C(=C(C(=C(C=3Cl)Cl)Cl)Cl)C2=O)C([H])([H])[H])C=1[H])C([H])([H])[H]	Inactive
C([H])([H])([H])C([H])(C([H])([H])C([H])(C([H])(C([H])([H])C(N([H])C([H])([H])C([H])([H])C1C([H])=C([H])C(Cl)=C([H])C=1[H])=O)O[H])N([H])C(C([H])(N([H])C(C([H])(N([H])C(OC([H])([H])C1C([H])=C([H])C([H])=C([H])C=1[H])=O)C([H])([H])C([H])([H])C([H])([H])N([H])C(N([H])[H])=N[H])=O)C([H])([H])[H])=O)C([H])([H])[H]	Inactive
C([H])([H])([H])C([H])([H])OC(C1C(=O)C2C(=C([H])C([H])=C3C=2N=C(C2C([H])=C([H])C([H])=C([H])C=2[H])C(C2C([H])=C([H])C([H])=C([H])C=2[H])=N3)N(C([H])([H])C([H])([H])[H])C=1[H])=O	Inactive
C([H])([H])([H])C([H])([H])OC(C1C(O[H])=C2C(C([H])=C([H])C3C2=NC(C2C([H])=C([H])C(F)=C([H])C=2[H])=C(C2C([H])=C([H])C(F)=C([H])C=2[H])N=3)=NC=1[H])=O	Inactive
C([H])([H])([H])C([H])([H])N1C(=O)C2(C([H])([H])C([H])([H])N(C([H])([H])C3C([H])=C(OC([H])([H])[H])C([H])=C([H])C=3[H])C([H])([H])C2([H])[H])N(C([H])([H])C([H])([H])C([H])(C([H])([H])[H])C([H])([H])[H])C1=O	Inactive
C([H])([H])([H])C([H])([H])C([H])(C1([H])C(=O)N([H])C([H])(C([H])([H])C2C([H])=C([H])C([H])=C([H])C=2[H])C(=O)N([H])C([H])([H])C(=O)N([H])C([H])(C([H])([H])C2C([H])=C([H])C([H])=C([H])C=2[H])C(=O)N([H])C([H])([H])C(=O)N([H])C([H])([H])C(=O)N([H])C([H])(C([H])(O[H])C([H])([H])[H])C(=O)N([H])C([H])(C([H])(C([H])([H])C([H])([H])[H])C([H])([H])[H])C(=O)N1[H])C([H])([H])[H]	Inactive
C([H])([H])([H])C([H])([H])C([H])(C1([H])C(=O)N([H])C([H])(C([H])([H])C([H])(C([H])([H])[H])C([H])([H])[H])C(=O)N([H])C([H])([H])C(=O)N([H])C([H])(C([H])(C([H])([H])[H])C([H])([H])[H])C(=O)N([H])C([H])(C([H])([H])C2C([H])=C([H])C([H])=C([H])C=2[H])C(=O)N([H])C([H])([H])C(=O)N([H])C([H])(C([H])(O[H])C([H])([H])[H])C(=O)N1[H])C([H])([H])[H]	Inactive
C([H])([H])([H])C([H])([H])OC(C(C(OC([H])([H])C([H])([H])[H])=O)=C([H])N([H])C1C([H])=C2C(N=C(C(C3C([H])=C([H])C([H])=C([H])C=3[H])=N2)C2C([H])=C([H])C([H])=C([H])C=2[H])=C([H])C=1[H])=O	Inactive
C([H])([H])([H])C([H])([H])OC(C([H])=C([H])C1C([H])=C(N([H])S(C2C([H])=C([H])C(C([H])([H])[H])=C([H])C=2[H])(=O)=O)C([H])=C([H])C=1[H])=O	Inactive
C([H])([H])([H])C([H])(C([H])([H])C([H])(C([H])(C([H])([H])C(N([H])C([H])([H])C([H])([H])C1C([H])=C([H])C([H])=C([H])C=1[H])=O)O[H])N([H])C(C([H])(N([H])C(C([H])(N([H])S(C1C([H])=C([H])C([H])=C([H])C=1[H])(=O)=O)C([H])([H])C([H])([H])C([H])([H])N([H])C(N([H])[H])=N[H])=O)C([H])([H])[H])=O)C([H])([H])[H]	Inactive
C([H])([H])([H])C([H])(C([H])([H])C([H])(C(N([H])C([H])(C(N([H])C([H])(C(N1C([H])(C([H])([H])OC2C([H])=C([H])C(F)=C([H])C=2[H])C([H])([H])C([H])([H])C1([H])[H])=O)C([H])([H])C1C2C(=C([H])C([H])=C([H])C=2[H])N([H])C=1[H])=O)C([H])([H])C([H])(C([H])([H])[H])C([H])([H])[H])=O)N([H])C(C([H])([H])N1C([H])([H])C([H])([H])C([H])(O[H])C([H])([H])C1([H])[H])=O)C([H])([H])[H]	Inactive
C([H])([H])([H])C([H])(C([H])(C(N1C([H])([H])C([H])([H])N(C(C([H])(N2C(=O)C3C(=C([H])C([H])=C([H])C=3[H])C2=O)C([H])(C([H])([H])[H])C([H])([H])[H])=O)C([H])([H])C1([H])[H])=O)N1C(=O)C2C(=C([H])C([H])=C([H])C=2[H])C1=O)C([H])([H])[H]	Inactive
O=C(C1C([H])=C2C(N([H])C([H])=C2[H])=C([H])C=1[H])N1C([H])([H])C([H])([H])N(C2([H])C3C(=C([H])C([H])=C([H])C=3[H])C3C2=C([H])C([H])=C([H])C=3[H])C([H])([H])C1([H])[H]	Inactive
C([H])([H])([H])C([H])(C([H])([H])C([H])(C(N([H])C([H])(C(N([H])C([H])(C(N1C(C([H])([H])OC2C([H])=C([H])C(F)=C([H])C=2[H])=NC([H])([H])C1([H])[H])=O)C([H])([H])C1C2C(=C([H])C([H])=C([H])C=2[H])N([H])C=1[H])=O)C([H])([H])C([H])(C([H])([H])[H])C([H])([H])[H])=O)N([H])C(C([H])([H])N1C([H])([H])C([H])([H])N(C([H])([H])[H])C([H])([H])C1([H])[H])=O)C([H])([H])[H]	Inactive
C([H])([H])([H])C1(OC2C(=C(C(=C(C=2[H])O[H])C(C([H])([H])C([H])([H])C2C([H])=C3C(OC4(C([H])(C3([H])[H])C(C([H])([H])[H])(C([H])([H])[H])C([H])([H])C([H])([H])C4([H])[H])C([H])([H])[H])=C([H])C=2[H])=O)O[H])C([H])([H])C1([H])[H])C([H])([H])[H]	Inactive
C([H])([H])([H])C(C([H])([H])[H])=C([H])C([H])([H])C([H])([H])C(C([H])([H])[H])=C([H])C([H])([H])N([H])C(C([H])([H])OC1([H])C2([H])C([H])([H])C3([H])C([H])([H])C([H])(C([H])([H])C1([H])C3([H])[H])C2([H])[H])=O	Inactive
C([H])([H])([H])C1=C([H])C([H])=C(C(C([H])=C([H])C2C([H])=C([H])C(C(O[H])=O)=C([H])C=2[H])=O)O1	Inactive
C([H])([H])([H])C([H])([H])OC(C1C(=O)C2C(=C([H])C([H])=C3C=2N=C(C2C([H])=C([H])C(F)=C([H])C=2[H])C(C2C([H])=C([H])C(F)=C([H])C=2[H])=N3)N(C([H])([H])C#C[H])C=1[H])=O	Inactive
C([H])([H])([H])C([H])(C([H])([H])C([H])(C(N([H])C([H])(C(N([H])C([H])(C(N1C(C([H])([H])OC2C([H])=C([H])C(F)=C([H])C=2[H])=NC([H])([H])C1([H])[H])=O)C([H])([H])C1C2C(=C([H])C([H])=C([H])C=2[H])N([H])C=1[H])=O)C([H])([H])C([H])(C([H])([H])[H])C([H])([H])[H])=O)N([H])C(C([H])([H])N1C([H])([H])C([H])([H])C([H])(C([H])([H])C([H])([H])O[H])C([H])([H])C1([H])[H])=O)C([H])([H])[H]	Inactive
C([H])([H])([H])C([H])(C1([H])C2(C([H])(C3([H])C([H])(C([H])([H])C2([H])[H])C2(C([H])(C([H])([H])C([H])(C([H])([H])C2([H])[H])O[H])C([H])([H])C3([H])O[H])C([H])([H])[H])C([H])([H])C1([H])[H])C([H])([H])[H])C([H])([H])C([H])([H])C(O[H])=O	Inactive
FC1C(Br)=C([H])C2=C(C(C(C([H])([H])SC3C([H])=C([H])C(Br)=C([H])C=3[H])=O)=C([H])N2[H])C=1[H]	Inactive
C([H])([H])([H])C1C([H])=C([H])C(SC([H])([H])C(C2C3C(=C([H])C([H])=C([H])C=3[H])N([H])C=2[H])=O)=C([H])C=1[H]	Inactive
C([H])([H])([H])C([H])([H])C([H])([H])C([H])([H])C([H])([H])C(N([H])C([H])([H])C([H])([H])C1C2C(=C([H])C([H])=C(C=2[H])OC([H])([H])[H])N([H])C=1[H])=O	Inactive
C([H])([H])([H])C([H])([H])C([H])([H])C(N([H])C([H])([H])C([H])([H])C1C2C(=C([H])C([H])=C(C=2[H])OC([H])([H])[H])N([H])C=1[H])=O	Inactive
N([H])([H])C1C([H])=C([H])C(SC([H])([H])C(C2C3C(=C([H])C([H])=C([H])C=3[H])N([H])C=2[H])=O)=C([H])C=1[H]	Inactive
C([H])([H])([H])C([H])(C([H])([H])C([H])(C([H])(C([H])([H])C(N(C([H])([H])C([H])([H])C1C([H])=C([H])C(Cl)=C([H])C=1[H])C([H])([H])[H])=O)O[H])N([H])C(C([H])(N([H])C(C([H])(N([H])C(OC([H])([H])C1C([H])=C([H])C([H])=C([H])C=1[H])=O)C([H])([H])C([H])([H])C([H])([H])N([H])C(N([H])[H])=N[H])=O)C([H])([H])[H])=O)C([H])([H])[H]	Inactive
C([H])([H])([H])C([H])(C1([H])C2(C([H])(C3([H])C([H])(C([H])([H])C2([H])[H])C2(C([H])(C([H])([H])C([H])(OC(C([H])([H])[H])=O)C([H])([H])C2([H])[H])C([H])([H])C3([H])OC(C([H])([H])[H])=O)C([H])([H])[H])C([H])([H])C1([H])[H])C([H])([H])[H])C([H])([H])C([H])([H])C(O[H])=O	Inactive
C([H])([H])([H])C([H])([H])OC(C(C(OC([H])([H])C([H])([H])[H])=O)=C([H])N([H])C1C([H])=C2C(N=C(C(C3C([H])=C([H])C(F)=C([H])C=3[H])=N2)C2C([H])=C([H])C(F)=C([H])C=2[H])=C([H])C=1[H])=O	Inactive
C([H])([H])([H])C([H])(C([H])([H])C([H])(C([H])(C([H])([H])C(N([H])C([H])([H])C([H])([H])C1C([H])=C([H])C([H])=C([H])C=1[H])=O)O[H])N([H])C(C([H])(C([H])(C([H])([H])[H])C([H])([H])[H])N([H])C(C([H])(N([H])C(OC([H])([H])C1C([H])=C([H])C([H])=C([H])C=1[H])=O)C([H])([H])C([H])([H])C([H])([H])N([H])C(C([H])([H])[H])=N[H])=O)=O)C([H])([H])[H]	Inactive
C([H])([H])([H])C([H])(C1([H])C2(C([H])(C3([H])C([H])(C([H])([H])C2([H])OC(C([H])([H])[H])=O)C2(C([H])(C([H])([H])C([H])(OC(C([H])([H])[H])=O)C([H])([H])C2([H])[H])C([H])([H])C3([H])OC(C([H])([H])[H])=O)C([H])([H])[H])C([H])([H])C1([H])[H])C([H])([H])[H])C([H])([H])C([H])([H])C(O[H])=O	Inactive
C([H])([H])([H])C([H])([H])C([H])(C1([H])C(=O)N([H])C([H])(C([H])([H])C2C([H])=C([H])C([H])=C([H])C=2[H])C(=O)N([H])C([H])([H])C(=O)N([H])C([H])(C([H])([H])C2C([H])=C([H])C([H])=C([H])C=2[H])C(=O)N([H])C([H])([H])C([H])([H])C([H])([H])C([H])([H])C(=O)N([H])C([H])(C([H])(O[H])C([H])([H])[H])C(=O)N([H])C([H])(C([H])(C([H])([H])C([H])([H])[H])C([H])([H])[H])C(=O)N1[H])C([H])([H])[H]	Inactive
C([H])([H])([H])C([H])(C([H])([H])C([H])(C([H])(C([H])([H])C(N([H])C([H])([H])C([H])([H])C1C([H])=C([H])C([H])=C([H])C=1[H])=O)O[H])N([H])C(C([H])(N([H])C(C([H])(N([H])C(C([H])([H])OC([H])([H])C1C([H])=C([H])C([H])=C([H])C=1[H])=O)C([H])([H])C([H])([H])C([H])([H])N([H])C(N([H])[H])=N[H])=O)C([H])([H])[H])=O)C([H])([H])[H]	Inactive
O([H])C1C(C(N([H])C([H])([H])C([H])(C2C([H])=C([H])C([H])=C([H])C=2[H])C2C([H])=C([H])C([H])=C([H])C=2[H])=O)=C([H])C(Cl)=C([H])C=1[H]	Inactive
C([H])([H])([H])C([H])(C([H])([H])C([H])(C([H])(C([H])([H])C(N([H])C([H])([H])C([H])([H])C1C([H])=C([H])C(Cl)=C([H])C=1[H])=O)O[H])N([H])C(C([H])(N(C(C([H])(N([H])C(OC([H])([H])C1C([H])=C([H])C([H])=C([H])C=1[H])=O)C([H])([H])C([H])([H])C([H])([H])N([H])C(N([H])[H])=N[H])=O)C([H])([H])[H])C([H])([H])[H])=O)C([H])([H])[H]	Inactive
C([H])([H])([H])N([H])C(C([H])([H])C([H])([H])C([H])([H])C([H])([H])C([H])([H])C([H])(C1N([H])C(C2C(C([H])([H])[H])=C3C(C([H])=C([H])C([H])=C3[H])=C([H])C=2[H])=C([H])N=1)N([H])C(C1SC([H])=NC=1[H])=O)=O	Inactive
C([H])([H])([H])C(C([H])([H])[H])=C([H])C([H])([H])C([H])([H])C(C([H])([H])[H])=C([H])C([H])([H])OC([H])([H])C([H])([H])OC1([H])C2([H])C([H])([H])C3([H])C([H])([H])C([H])(C([H])([H])C1([H])C3([H])[H])C2([H])[H]	Inactive
C([H])([H])([H])C([H])(C([H])([H])C1([H])C(=O)N([H])C([H])([H])C(=O)N([H])C([H])(C([H])([H])C([H])(C([H])([H])[H])C([H])([H])[H])C(=O)N([H])C([H])(C([H])([H])C([H])(C([H])([H])[H])C([H])([H])[H])C(=O)N([H])C([H])(C([H])([H])C([H])(C([H])([H])[H])C([H])([H])[H])C(=O)N([H])C([H])(C([H])([H])C2C([H])=C([H])C(O[H])=C([H])C=2[H])C(=O)N2C([H])(C([H])([H])C([H])([H])C2([H])[H])C(=O)N1[H])C([H])([H])[H]	Inactive
C([H])([H])([H])OC1C(O[H])=C([H])C([H])=C(C([H])=C([H])C(C([H])([H])C(C([H])=C([H])C2C([H])=C(OC([H])([H])[H])C(O[H])=C([H])C=2[H])=O)=O)C=1[H]	Inactive
C([H])([H])([H])C([H])(C1([H])C2(C([H])(C3([H])C([H])(C([H])([H])C2([H])[H])C2(C([H])(C([H])([H])C([H])(C([H])([H])C2([H])[H])O[H])C([H])([H])C3([H])[H])C([H])([H])[H])C([H])([H])C1([H])[H])C([H])([H])[H])C([H])([H])C([H])([H])C(O[H])=O	Inactive
C([H])([H])([H])C([H])(C([H])([H])C([H])(C(N([H])C([H])(C(N([H])N([H])C1C([H])=C([H])C([H])=C([H])C=1[H])=O)C([H])([H])C1C([H])=C([H])C([H])=C([H])C=1[H])=O)N([H])C(C([H])(N([H])C(C1=C([H])C([H])=C([H])O1)=O)C([H])([H])C([H])(C([H])([H])[H])C([H])([H])[H])=O)C([H])([H])[H]	Inactive
ClC1C([H])=C([H])C(N([H])C([H])([H])C(C2C3C(=C([H])C([H])=C([H])C=3[H])N([H])C=2[H])=O)=C([H])C=1[H]	Inactive
O=C(C1C2C(=C([H])C([H])=C([H])C=2[H])N([H])C=1[H])C([H])([H])SC1C([H])=C([H])C([H])=C([H])C=1[H]	Inactive
C([H])([H])([H])C([H])(C([H])([H])C([H])(N(C(C([H])(N([H])C(C([H])(N([H])C(OC([H])([H])C1C([H])=C([H])C([H])=C([H])C=1[H])=O)C([H])([H])C([H])([H])C([H])([H])N([H])C(N([H])[H])=N[H])=O)C([H])([H])[H])=O)C([H])([H])[H])C([H])(C([H])([H])C(N([H])C([H])([H])C([H])([H])C1C([H])=C([H])C(Cl)=C([H])C=1[H])=O)O[H])C([H])([H])[H]	Inactive
C([H])([H])([H])C([H])([H])OC(C1C(O[H])=C2C(C([H])=C([H])C3C2=NC(C2C([H])=C([H])C([H])=C([H])C=2[H])=C(C2C([H])=C([H])C([H])=C([H])C=2[H])N=3)=NC=1[H])=O	Inactive
C([H])([H])([H])C([H])(C1([H])C2(C([H])(C3([H])C([H])(C([H])([H])C2([H])OC(C([H])([H])[H])=O)C2(C([H])(C([H])([H])C([H])(OC(C([H])([H])[H])=O)C([H])([H])C2([H])[H])C([H])([H])C3([H])[H])C([H])([H])[H])C([H])([H])C1([H])[H])C([H])([H])[H])C([H])([H])C([H])([H])C(O[H])=O	Inactive
C([H])([H])([H])C([H])([H])OC(C1C(=O)C2C(=C([H])C([H])=C3C=2N=C(C2C([H])=C([H])C(F)=C([H])C=2[H])C(C2C([H])=C([H])C(F)=C([H])C=2[H])=N3)N(C([H])([H])C([H])([H])[H])C=1[H])=O	Inactive
C([H])([H])([H])C([H])(C1([H])C2(C([H])(C3([H])C([H])(C([H])([H])C2([H])[H])C2(C([H])(C([H])([H])C([H])(OC(C([H])([H])[H])=O)C([H])([H])C2([H])[H])C([H])(OC(C([H])([H])[H])=O)C3([H])[H])C([H])([H])[H])C([H])([H])C1([H])[H])C([H])([H])[H])C([H])([H])C([H])([H])C(O[H])=O	Inactive
FC1C([H])=C(C([H])([H])OC(N([H])C2C(=O)N3C(C([H])=C([H])C([H])=C3[H])=NC=2[H])=O)C([H])=C([H])C=1[H]	Inactive
C([H])([H])([H])C([H])(C([H])([H])C([H])(C([H])(C([H])([H])C(N([H])C1([H])C([H])([H])C([H])([H])C([H])([H])C([H])([H])C1([H])[H])=O)O[H])N([H])C(C([H])(N([H])C(C([H])(N([H])C(OC([H])([H])C1C([H])=C([H])C([H])=C([H])C=1[H])=O)C([H])([H])C([H])([H])C([H])([H])N([H])C(N([H])[H])=N[H])=O)C([H])([H])[H])=O)C([H])([H])[H]	Inactive
C([H])([H])([H])OC1C([H])=C([H])C(OC([H])([H])C2([H])N(C(C([H])(N([H])C(C([H])(N([H])C(C([H])(N([H])C(N3C([H])([H])C([H])([H])C([H])([H])C([H])([H])C3([H])[H])=O)C([H])([H])C([H])(C([H])([H])[H])C([H])([H])[H])=O)C([H])([H])C([H])(C([H])([H])[H])C([H])([H])[H])=O)C([H])([H])C3C([H])=C([H])C([H])=C([H])C=3[H])=O)C([H])([H])C([H])([H])C2([H])[H])=C([H])C=1[H]	Inactive
O=C(N1C([H])([H])C([H])([H])C([H])([H])C([H])([H])C1([H])[H])C([H])(N1C(=O)C2C(=C([H])C([H])=C([H])C=2[H])C1=O)C([H])([H])C1C([H])=C([H])C([H])=C([H])C=1[H]	Inactive
FC(C1C([H])=C([H])C(C([H])([H])N([H])C(C2C(=O)N3C(C([H])=C([H])C([H])=C3[H])=NC=2[H])=O)=C([H])C=1[H])(F)F	Inactive
C([H])([H])([H])C([H])([H])C([H])([H])C([H])([H])N1C2C([H])=C([H])C3C(C=2C(=O)C(C(O[H])=O)=C1[H])=NC(C1C([H])=C([H])C(F)=C([H])C=1[H])=C(C1C([H])=C([H])C(F)=C([H])C=1[H])N=3	Inactive
C([H])([H])([H])C([H])(C1([H])C2(C([H])(C3([H])C([H])(C([H])([H])C2([H])[H])C2(C([H])(C([H])([H])C([H])(C([H])([H])C2([H])[H])O[H])C([H])(O[H])C3([H])[H])C([H])([H])[H])C([H])([H])C1([H])[H])C([H])([H])[H])C([H])([H])C([H])([H])C(O[H])=O	Inactive
C([H])([H])([H])C([H])([H])C([H])(C1([H])C(=O)N([H])C([H])(C([H])([H])C([H])(C([H])([H])[H])C([H])([H])[H])C(=O)N([H])C([H])([H])C(=O)N([H])C([H])(C([H])([H])O[H])C(=O)N([H])C([H])(C([H])(C([H])([H])C([H])([H])[H])C([H])([H])[H])C(=O)N([H])C([H])(C([H])(C([H])([H])C([H])([H])[H])C([H])([H])[H])C(=O)N([H])C([H])(C([H])([H])C([H])(C([H])([H])[H])C([H])([H])[H])C(=O)N([H])C([H])([H])C(=O)N1[H])C([H]…	Inactive
FC1C([H])=C(C([H])([H])N([H])C(C2C(=O)N3C(C([H])=C([H])C([H])=C3[H])=NC=2[H])=O)C([H])=C([H])C=1[H]	Inactive
ClC1C([H])=C(SC([H])([H])C(C2C3C(=C([H])C([H])=C([H])C=3[H])N([H])C=2[H])=O)C([H])=C([H])C=1[H]	Inactive
C([H])([H])([H])C([H])(C([H])([H])C([H])(C(N1C([H])([H])C([H])([H])C([H])(C([H])([H])C2C([H])=C([H])C([H])=C([H])C=2[H])C([H])([H])C1([H])[H])=O)N1C(=O)C2C(=C([H])C([H])=C([H])C=2[H])C1=O)C([H])([H])[H]	Inactive
BrC1C([H])=C([H])C(SC([H])([H])C(C2C3C(=C(C([H])=C([H])C=3[H])I)N([H])C=2[H])=O)=C([H])C=1[H]	Inactive
O([H])C1([H])C(=O)C2C(=C([H])C(=C([H])C=2O[H])O[H])OC1([H])C1C([H])=C(O[H])C(O[H])=C([H])C=1[H]	Inactive
C([H])([H])([H])C([H])(C([H])(C(N1C([H])([H])C([H])([H])C([H])(C([H])([H])C2C([H])=C([H])C([H])=C([H])C=2[H])C([H])([H])C1([H])[H])=O)N1C(=O)C2C(=C([H])C([H])=C([H])C=2[H])C1=O)C([H])([H])[H]	Inactive
O=C(N1C([H])([H])C([H])([H])OC([H])([H])C1([H])[H])C([H])(N1C(=O)C2C(=C([H])C([H])=C([H])C=2[H])C1=O)C([H])([H])C1C([H])=C([H])C([H])=C([H])C=1[H]	Inactive
C([H])([H])([H])C(C([H])([H])[H])=C([H])C([H])([H])C([H])([H])C(C([H])([H])[H])=C([H])C([H])([H])N([H])C([H])([H])C([H])([H])OC1C([H])=C([H])C([H])=C([H])C=1[H]	Inactive
O=C(N1C([H])([H])C([H])([H])N(C(C([H])(N2C(=O)C3C(=C([H])C([H])=C([H])C=3[H])C2=O)C([H])([H])C2C([H])=C([H])C([H])=C([H])C=2[H])=O)C([H])([H])C1([H])[H])C([H])(N1C(=O)C2C(=C([H])C([H])=C([H])C=2[H])C1=O)C([H])([H])C1C([H])=C([H])C([H])=C([H])C=1[H]	Inactive
O([H])C([H])([H])C1C([H])=C(C(N([H])C([H])([H])C([H])(C2C([H])=C([H])C([H])=C([H])C=2[H])C2C([H])=C([H])C([H])=C([H])C=2[H])=O)C(O[H])=C([H])C=1[H]	Inactive
C([H])([H])([H])C([H])([H])C([H])(C([H])(C(N1C([H])([H])C([H])([H])C([H])(C([H])([H])C2C([H])=C([H])C([H])=C([H])C=2[H])C([H])([H])C1([H])[H])=O)N1C(=O)C2C(=C([H])C([H])=C([H])C=2[H])C1=O)C([H])([H])[H]	Inactive
C([H])([H])([H])C([H])(C([H])([H])C1([H])C(=O)N([H])C([H])([H])C(=O)N([H])C([H])(C([H])(C([H])([H])[H])C([H])([H])[H])C(=O)N([H])C([H])(C([H])([H])C([H])(C([H])([H])[H])C([H])([H])[H])C(=O)N([H])C([H])(C([H])([H])C([H])(C([H])([H])[H])C([H])([H])[H])C(=O)N([H])C([H])(C([H])([H])C2C([H])=C([H])C(O[H])=C([H])C=2[H])C(=O)N2C([H])(C([H])([H])C([H])([H])C2([H])[H])C(=O)N1[H])C([H])([H])[H]	Inactive
FC1C([H])=C([H])C(C([H])([H])SC([H])([H])C(C2C3C(=C([H])C([H])=C([H])C=3[H])N([H])C=2[H])=O)=C([H])C=1[H]	Inactive
FC1C([H])=C(F)C(C([H])([H])N([H])C(C2C(=O)N3C(C([H])=C([H])C([H])=C3[H])=NC=2[H])=O)=C([H])C=1[H]	Inactive
C([H])([H])([H])C([H])(C1([H])C2(C([H])(C3([H])C([H])(C([H])([H])C2([H])[H])C2(C([H])(C([H])([H])C([H])(OC(C([H])([H])[H])=O)C([H])([H])C2([H])[H])C([H])([H])C3([H])[H])C([H])([H])[H])C([H])([H])C1([H])[H])C([H])([H])[H])C([H])([H])C([H])([H])C(O[H])=O	Inactive
C([H])([H])([H])C([H])([H])OC(C1C2=C(C([H])([H])C([H])([H])C([H])(C3C([H])=C([H])C(O[H])=C([H])C=3[H])O2)C(O[H])=C([H])C=1O[H])=O	Inactive
C([H])([H])([H])C([H])([H])C([H])(C([H])(C(N1C([H])([H])C([H])([H])OC([H])([H])C1([H])[H])=O)N1C(=O)C2C(=C([H])C([H])=C([H])C=2[H])C1=O)C([H])([H])[H]	Inactive
O([H])C1C([H])=C([H])C(C2([H])OC3C(=C(C([H])=C4C=3C3(C(C5C([H])=C([H])C(O[H])=C([H])C=5[H])(OC5C(C3=O)=C(O[H])C([H])=C(O[H])C=5[H])O4)O[H])O[H])C([H])([H])C2([H])[H])=C([H])C=1[H]	Inactive
C([H])([H])([H])OC1C([H])=C([H])C(C2C3C(=NC([H])=NC=3N([H])[H])N(C3([H])C([H])([H])C([H])([H])C([H])([H])C3([H])[H])C=2[H])=C([H])C=1[H]	Inactive
FC(C1C([H])=C(C([H])([H])N([H])C(C2C(=O)N3C(C([H])=C([H])C([H])=C3[H])=NC=2[H])=O)C([H])=C([H])C=1[H])(F)F	Inactive
C([H])([H])([H])C([H])(C([H])([H])C([H])(C([H])(C([H])([H])C(N([H])C([H])([H])C([H])([H])C1C([H])=C([H])C(Cl)=C([H])C=1[H])=O)O[H])N([H])C(C([H])(N([H])C(C([H])(N(C(OC([H])([H])C1C([H])=C([H])C([H])=C([H])C=1[H])=O)C([H])([H])[H])C([H])([H])C([H])([H])C([H])([H])N([H])C(N([H])[H])=N[H])=O)C([H])([H])[H])=O)C([H])([H])[H]	Inactive
C([H])([H])([H])C([H])(N(C(N([H])C1C(=O)N2C(C([H])=C([H])C([H])=C2[H])=NC=1[H])=O)C([H])([H])C1C([H])=C([H])C([H])=C([H])C=1[H])C([H])([H])[H]	Inactive
C([H])([H])([H])C1C([H])=C([H])N2C(=NC([H])=C(C2=O)C(N([H])C([H])([H])C2C([H])=C([H])C(C(F)(F)F)=C([H])C=2[H])=O)C=1[H]	Inactive
O=C(C1C2C(=C([H])C([H])=C([H])C=2[H])N([H])C=1[H])C([H])([H])N([H])C1C([H])=C([H])C([H])=C([H])C=1[H]	Inactive
O([H])C1([H])C(=O)C2C(=C([H])C(=C([H])C=2O[H])O[H])OC1([H])C1C([H])=C(O[H])C(O[H])=C(O[H])C=1[H]	Inactive
O=C(N1C([H])([H])C([H])([H])C([H])([H])C1([H])[H])C([H])(N1C(=O)C2C(=C([H])C([H])=C([H])C=2[H])C1=O)C([H])([H])C1C([H])=C([H])C([H])=C([H])C=1[H]	Inactive
C([H])([H])([H])C([H])(C1([H])C2(C([H])(C3([H])C([H])(C([H])([H])C2([H])O[H])C2(C([H])(C([H])([H])C([H])(C([H])([H])C2([H])[H])O[H])C([H])([H])C3([H])[H])C([H])([H])[H])C([H])([H])C1([H])[H])C([H])([H])[H])C([H])([H])C([H])([H])C(O[H])=O	Inactive
C([H])([H])([H])OC1C([H])=C([H])C(C2C([H])=C([H])C3N(C(C(C(N([H])C([H])([H])C4([H])OC([H])([H])C([H])([H])C4([H])[H])=O)=C([H])N=3)=O)C=2[H])=C([H])C=1[H]	Inactive
O=C(C1C(=O)N2C(C([H])=C([H])C([H])=C2[H])=NC=1[H])N([H])C1C(OC([H])([H])C2C([H])=C([H])C([H])=C([H])C=2[H])=C([H])C([H])=C([H])N=1	Inactive
FC(C1C(C([H])([H])N([H])C(N([H])C2C(=O)N3C(C([H])=C([H])C([H])=C3[H])=NC=2[H])=O)=C([H])C([H])=C([H])C=1[H])(F)F	Inactive
C([H])([H])([H])OC1C([H])=C([H])C(C2(C(=O)N(C3C([H])=C([H])C([H])=C([H])C=3[H])C(=N[H])N2[H])C2C([H])=C([H])C(OC([H])([H])[H])=C([H])C=2[H])=C([H])C=1[H]	Inactive
O([H])C1C(C(N([H])C([H])([H])C([H])(C2C([H])=C([H])C([H])=C([H])C=2[H])C2C([H])=C([H])C([H])=C([H])C=2[H])=O)=C([H])C([H])=C(F)C=1F	Inactive
C([H])([H])([H])N(C1C([H])=C([H])C(SC([H])([H])C(C2C3C(=C([H])C([H])=C([H])C=3[H])N([H])C=2[H])=O)=C([H])C=1[H])C([H])([H])[H]	Inactive
BrC1C([H])=C(SC([H])([H])C(C2C3C(=C([H])C([H])=C([H])C=3[H])N([H])C=2[H])=O)C([H])=C([H])C=1[H]	Inactive
C([H])([H])([H])C([H])([H])C([H])(C([H])(C(N1C([H])([H])C([H])([H])C([H])([H])C([H])([H])C1([H])[H])=O)N1C(=O)C2C(=C([H])C([H])=C([H])C=2[H])C1=O)C([H])([H])[H]	Inactive
C([H])([H])([H])C([H])(C1([H])C2(C([H])(C3([H])C([H])(C([H])([H])C2([H])[H])C2(C([H])(C([H])([H])C([H])(C([H])([H])C2([H])[H])O[H])C([H])(O[H])C3([H])O[H])C([H])([H])[H])C([H])([H])C1([H])[H])C([H])([H])[H])C([H])([H])C([H])([H])C(O[H])=O	Inactive
C([H])([H])([H])C([H])(C1C([H])=C([H])C([H])=C([H])C=1[H])SC([H])([H])C(C1C2C(=C([H])C([H])=C([H])C=2[H])N([H])C=1[H])=O	Inactive
C([H])([H])([H])C([H])(C([H])(C(N1C([H])([H])C([H])([H])C([H])([H])C([H])([H])C1([H])[H])=O)N1C(=O)C2C(=C([H])C([H])=C([H])C=2[H])C1=O)C([H])([H])[H]	Inactive
O=C(C1C2C(=C([H])C([H])=C([H])C=2[H])N([H])C=1[H])C([H])([H])SC([H])([H])C1C([H])=C([H])C([H])=C([H])C=1[H]	Inactive
C([H])([H])([H])C([H])(C1([H])C2(C([H])(C3([H])C([H])(C([H])([H])C2([H])O[H])C2(C([H])(C([H])([H])C([H])(C([H])([H])C2([H])[H])O[H])C([H])([H])C3([H])O[H])C([H])([H])[H])C([H])([H])C1([H])[H])C([H])([H])[H])C([H])([H])C([H])([H])C(O[H])=O	Inactive
C([H])([H])([H])C([H])(C([H])([H])C([H])(C(N1C([H])([H])C([H])([H])OC([H])([H])C1([H])[H])=O)N1C(=O)C2C(=C([H])C([H])=C([H])C=2[H])C1=O)C([H])([H])[H]	Inactive
C([H])([H])([H])C([H])(C([H])(C(N1C([H])([H])C([H])([H])C([H])([H])C1([H])[H])=O)N1C(=O)C2C(=C([H])C([H])=C([H])C=2[H])C1=O)C([H])([H])[H]	Inactive
C([H])([H])([H])C([H])([H])C([H])(C([H])(C(N1C([H])([H])C([H])([H])C([H])([H])C1([H])[H])=O)N1C(=O)C2C(=C([H])C([H])=C([H])C=2[H])C1=O)C([H])([H])[H]	Inactive
O([H])C1C(C(N([H])C([H])([H])C([H])(C2C([H])=C([H])C([H])=C([H])C=2[H])C2C([H])=C([H])C([H])=C([H])C=2[H])=O)=C([H])C(Cl)=C([H])C=1Cl	Inactive
C([H])([H])([H])C([H])(C([H])([H])C([H])(C(N1C([H])([H])C([H])([H])N(C(C([H])(N2C(=O)C3C(=C([H])C([H])=C([H])C=3[H])C2=O)C([H])([H])C([H])(C([H])([H])[H])C([H])([H])[H])=O)C([H])([H])C1([H])[H])=O)N1C(=O)C2C(=C([H])C([H])=C([H])C=2[H])C1=O)C([H])([H])[H]	Inactive
C([H])([H])([H])C([H])(C([H])(C(N1C([H])([H])C([H])([H])OC([H])([H])C1([H])[H])=O)N1C(=O)C2C(=C([H])C([H])=C([H])C=2[H])C1=O)C([H])([H])[H]	Inactive
C([H])([H])([H])C([H])(C([H])([H])C([H])(C(N1C([H])([H])C([H])([H])C([H])([H])C([H])([H])C1([H])[H])=O)N1C(=O)C2C(=C([H])C([H])=C([H])C=2[H])C1=O)C([H])([H])[H]	Inactive
C([H])([H])([H])C([H])(C([H])([H])C([H])(C(N1C([H])([H])C([H])([H])C([H])([H])C1([H])[H])=O)N1C(=O)C2C(=C([H])C([H])=C([H])C=2[H])C1=O)C([H])([H])[H]	Inactive
BrC1C([H])=C([H])C(SC([H])([H])C(C2C3C(=C([H])C(=C([H])C=3[H])Br)N([H])C=2[H])=O)=C([H])C=1[H]	Inactive
C([H])([H])([H])C(C([H])([H])[H])=C([H])C([H])([H])C([H])([H])C(C([H])([H])[H])=C([H])C([H])([H])N([H])C([H])([H])C([H])([H])OC1C2C(=C([H])C([H])=C([H])C=2[H])C([H])=C([H])C=1[H]	Inactive
C([H])([H])([H])C([H])([H])C([H])(C([H])(C(N([H])C([H])(C(N([H])C([H])([H])C(N([H])C([H])(C(N([H])C([H])(C(N([H])C([H])(C(N([H])C([H])(C(N([H])C([H])([H])C(O[H])=O)=O)C([H])([H])C([H])(C([H])([H])[H])C([H])([H])[H])=O)C([H])(C([H])([H])C([H])([H])[H])C([H])([H])[H])=O)C([H])(C([H])([H])C([H])([H])[H])C([H])([H])[H])=O)C([H])([H])O[H])=O)=O)C([H])([H])C([H])(C([H])([H])[H])C([H])([H])[H])=O)N([H])…	Inactive
C([H])([H])([H])C([H])([H])C([H])(C1([H])C(=O)N([H])C([H])(C([H])([H])C([H])(C([H])([H])[H])C([H])([H])[H])C(=O)N([H])C([H])([H])C(=O)N([H])C([H])(C([H])([H])O[H])C(=O)N2C([H])(C([H])([H])C([H])([H])C2([H])[H])C(=O)N([H])C([H])(C([H])(C([H])([H])C([H])([H])[H])C([H])([H])[H])C(=O)N([H])C([H])(C([H])([H])C([H])(C([H])([H])[H])C([H])([H])[H])C(=O)N([H])C([H])(C([H])([H])C([H])(C([H])([H])[H])C([H])…	Inactive
C([H])([H])([H])C1([H])C2([H])C34OOC(C([H])([H])C2([H])[H])(C([H])([H])[H])OC3([H])OC([H])(O[H])C([H])(C4([H])C([H])([H])C1([H])[H])C([H])([H])[H]	Inactive
C([H])([H])([H])OC1C([H])=C2C(N=C([H])C([H])=C2C([H])(C2([H])N3C([H])([H])C([H])(C([H])(C([H])([H])C3([H])[H])C2([H])[H])C([H])=C([H])[H])OC([H])([H])C2N=NN(C3C(C#N)=C([H])C([H])=C([H])C=3[H])C=2[H])=C([H])C=1[H]	Inactive
S=C(N([H])C([H])(C1C([H])=C([H])C([H])=C([H])C=1[H])C1C([H])=C([H])C([H])=C([H])C=1[H])N([H])C([H])([H])C([H])([H])C([H])([H])N([H])C([H])([H])C([H])([H])C([H])([H])N([H])C([H])([H])C([H])([H])C([H])([H])N([H])C(N([H])C([H])(C1C([H])=C([H])C([H])=C([H])C=1[H])C1C([H])=C([H])C([H])=C([H])C=1[H])=S	Inactive
O([H])B1C2C(=C([H])C([H])=C(C=2[H])OC2C([H])=C([H])C(C(O[H])=O)=C([H])C=2[H])C([H])([H])O1	Inactive
ClC1C([H])=C(C([H])([H])C2N=C(C3=C(OC4([H])C([H])([H])C([H])([H])N([H])C([H])([H])C4([H])[H])C4C(=C([H])C([H])=C([H])C=4[H])S3)ON=2)C([H])=C([H])C=1[H]	Inactive
S=C(N([H])C([H])([H])C([H])(C1C([H])=C([H])C([H])=C([H])C=1[H])C1C([H])=C([H])C([H])=C([H])C=1[H])N([H])C([H])([H])C([H])([H])C([H])([H])N([H])C([H])([H])C([H])([H])C([H])([H])N([H])C([H])([H])C([H])([H])C([H])([H])N([H])C(N([H])C([H])([H])C([H])(C1C([H])=C([H])C([H])=C([H])C=1[H])C1C([H])=C([H])C([H])=C([H])C=1[H])=S	Inactive
C([H])([H])([H])C([H])([H])N([H])C(N([H])C([H])([H])C([H])([H])C([H])([H])N([H])C([H])([H])C([H])([H])C([H])([H])C([H])([H])C([H])([H])C([H])([H])N([H])C([H])([H])C([H])([H])C([H])([H])N([H])C(N([H])C([H])([H])C([H])([H])[H])=S)=S	Inactive
O([H])C1C([H])=C([H])C(N([H])C2C3C(=C([H])C(=C([H])C=3[H])Cl)N=C([H])C=2[H])=C([H])C=1[H]	Inactive
C([H])([H])([H])C([H])(C([H])([H])C([H])([H])C1=C(C(N([H])C([H])([H])C([H])([H])C([H])([H])N(C([H])([H])[H])C([H])([H])[H])=O)N=C(N([H])C(C2N(C([H])([H])[H])C([H])=C(N([H])C(C3N=C([H])C4C(=C([H])C([H])=C([H])C=4[H])C=3[H])=O)C=2[H])=O)S1)C([H])([H])[H]	Inactive
C([H])([H])([H])OC1C([H])=C(OC([H])([H])[H])C([H])=C(C([H])([H])C([H])([H])OC(C2=C(OC3([H])C([H])([H])C([H])([H])N([H])C([H])([H])C3([H])[H])C3C(=C([H])C([H])=C([H])C=3[H])S2)=O)C=1[H]	Inactive
S=C(N([H])C([H])([H])C([H])([H])C([H])(C1C([H])=C([H])C([H])=C([H])C=1[H])C1C([H])=C([H])C([H])=C([H])C=1[H])N([H])C([H])([H])C([H])([H])C([H])([H])N([H])C([H])([H])C([H])([H])C([H])([H])N([H])C([H])([H])C([H])([H])C([H])([H])N([H])C(N([H])C([H])([H])C([H])([H])C([H])(C1C([H])=C([H])C([H])=C([H])C=1[H])C1C([H])=C([H])C([H])=C([H])C=1[H])=S	Inactive
C([H])([H])([H])OC1C([H])=C(C([H])([H])C2N=C(C3=C(OC4([H])C([H])([H])C([H])([H])N([H])C([H])([H])C4([H])[H])C4C(=C([H])C([H])=C([H])C=4[H])S3)ON=2)C([H])=C([H])C=1[H]	Inactive
C([H])([H])([H])C1(N=C(C2N=C([H])C(OC3C([H])=C4C(C([H])([H])OB4O[H])=C([H])C=3[H])=NC=2[H])OC1([H])[H])C([H])([H])[H]	Inactive
C([H])([H])([H])OC1C([H])=C2C(N=C([H])C([H])=C2C([H])(C2([H])N3C([H])([H])C([H])(C([H])(C([H])([H])C3([H])[H])C2([H])[H])C([H])=C([H])[H])OC([H])([H])C2N=NN(C([H])=C([H])N3C4C(=C([H])C([H])=C([H])C=4[H])N=N3)C=2[H])=C([H])C=1[H]	Inactive
C([H])([H])([H])C(C(N([H])C([H])(C1C([H])=C([H])C(F)=C([H])C=1[H])C(N([H])O[H])=O)=O)(C([H])([H])[H])C([H])([H])[H]	Inactive
C([H])([H])([H])C1C2=C(C3C(=C([H])N2C([H])([H])[H])C2C(=C([H])C([H])=C([H])C=2[H])N=3)C([H])=C([H])C=1[H]	Inactive
C([H])([H])([H])SC1C([H])=C([H])C(C([H])=C([H])C2N=C3C(C([H])=C(C(N([H])C4=C([H])N(C([H])([H])[H])C(C(N([H])C5=C([H])N(C([H])([H])[H])C(C(N([H])C([H])([H])C([H])([H])N6C([H])([H])C([H])([H])OC([H])([H])C6([H])[H])=O)=C5[H])=O)=C4[H])=O)C([H])=C3[H])=C([H])C=2[H])=C([H])C=1[H]	Inactive
C([H])([H])([H])N1C(C(N([H])C([H])([H])C([H])([H])N2C([H])([H])C([H])([H])OC([H])([H])C2([H])[H])=O)=C([H])C(N([H])C(C2N(C([H])([H])[H])C([H])=C(N([H])C(C3N(C([H])([H])[H])C([H])=C(N([H])C(C4C(Cl)=C([H])C(Cl)=C([H])C=4[H])=O)C=3[H])=O)C=2[H])=O)=C1[H]	Inactive
O=C(C1C(=O)C2C(=C([H])C([H])=C(C=2[H])OC2C([H])=C([H])C([H])=C([H])C=2[H])N([H])C=1[H])OC1([H])C([H])([H])C([H])([H])C([H])([H])C([H])([H])C1([H])[H]	Inactive
C([H])([H])([H])N1C(C(N([H])C([H])([H])C([H])([H])N2C([H])([H])C([H])([H])OC([H])([H])C2([H])[H])=O)=C([H])C(N([H])C(C2N(C([H])([H])[H])C([H])=C(N([H])C(C3C([H])=C([H])C(C([H])=C([H])C4=C([H])C5C(=NON=5)C([H])=C4[H])=C([H])C=3[H])=O)C=2[H])=O)=C1[H]	Inactive
C([H])([H])([H])OC1C([H])=C([H])C(C([H])=C([H])C2N=C3C(C([H])=C(C(N([H])C4=C([H])N(C([H])([H])[H])C(C(N([H])C5=C([H])N(C([H])([H])[H])C(C(N([H])C([H])([H])C([H])([H])N6C([H])([H])C([H])([H])OC([H])([H])C6([H])[H])=O)=C5[H])=O)=C4[H])=O)C([H])=C3[H])=C([H])C=2[H])=C([H])C=1[H]	Inactive
C([H])([H])([H])C([H])(C([H])([H])C([H])([H])C1=C(C(N([H])C([H])([H])C([H])([H])C([H])([H])N(C([H])([H])[H])C([H])([H])[H])=O)N=C(N([H])C(C2N(C([H])([H])[H])C([H])=C(N([H])C(C3N(C([H])([H])[H])C([H])=C(N([H])C(C4N=C([H])C5C(=C([H])C([H])=C([H])C=5[H])C=4[H])=N[H])C=3[H])=O)C=2[H])=O)S1)C([H])([H])[H]	Inactive
C([H])([H])([H])OC1C([H])=C2C(N=C([H])C([H])=C2C([H])(C2([H])N3C([H])([H])C([H])(C([H])(C([H])([H])C3([H])[H])C2([H])[H])C([H])=C([H])[H])OC([H])([H])C2N=NN(C3C([H])=C(C#N)C([H])=C([H])C=3[H])C=2[H])=C([H])C=1[H]	Inactive
C([H])([H])([H])C1C(C([H])([H])C2=NN=C(C3=C(OC4([H])C([H])([H])C([H])([H])N([H])C([H])([H])C4([H])[H])C4C(=C([H])C([H])=C([H])C=4[H])S3)O2)=C(C([H])([H])[H])N([H])N=1	Inactive
C([H])([H])([H])OC1C([H])=C([H])C(N2N=NC(C([H])([H])OC([H])(C3C4C(=C([H])C([H])=C(C=4[H])OC([H])([H])[H])N=C([H])C=3[H])C3([H])N4C([H])([H])C([H])(C([H])(C([H])([H])C4([H])[H])C3([H])[H])C([H])=C([H])[H])=C2[H])=C([H])C=1[H]	Inactive
O([H])C([H])([H])C1N=C([H])C(OC2C([H])=C3C(C([H])([H])OB3O[H])=C([H])C=2[H])=NC=1[H]	Inactive
C([H])([H])(C1N=C(C2=C(OC3([H])C([H])([H])C([H])([H])N([H])C([H])([H])C3([H])[H])C3C(=C([H])C([H])=C([H])C=3[H])S2)ON=1)C1C([H])=C([H])C([H])=C([H])C=1[H]	Inactive
C([H])([H])([H])OC1C([H])=C(OC([H])([H])[H])C([H])=C(C([H])([H])C2N=C(C3=C(OC4([H])C([H])([H])C([H])([H])N([H])C([H])([H])C4([H])[H])C4C(=C([H])C([H])=C([H])C=4[H])S3)ON=2)C=1[H]	Inactive
C([H])([H])([H])OC1C([H])=C(C(N([H])C2=C([H])N(C([H])([H])[H])C(C(N([H])C3=C([H])N(C([H])([H])[H])C(C(N([H])C4SC(C([H])(C([H])([H])[H])C([H])([H])[H])=C(C(N([H])C([H])([H])C([H])([H])N5C([H])([H])C([H])([H])OC([H])([H])C5([H])[H])=O)N=4)=O)=C3[H])=O)=C2[H])=N[H])N=C([H])C=1[H]	Inactive
O([H])N=C([H])C1N=C([H])C(OC2C([H])=C3C(C([H])([H])OB3O[H])=C([H])C=2[H])=NC=1[H]	Inactive
C([H])([H])([H])N1C(C(N([H])C([H])([H])C([H])([H])C([H])([H])N2C([H])([H])C([H])([H])OC([H])([H])C2([H])[H])=O)=C([H])C(N([H])C(C2N(C([H])([H])[H])C([H])=C(N([H])C(C3N(C([H])([H])[H])C([H])=C(N([H])C(C4C(Cl)=C([H])C(Cl)=C([H])C=4[H])=O)C=3[H])=O)C=2[H])=O)=C1[H]	Inactive
O([H])B1C2C(=C([H])C([H])=C(C=2[H])OC2N=C([H])C(C#N)=NC=2[H])C([H])([H])O1	Inactive
C([H])([H])([H])OC1C([H])=C(C([H])([H])C2=NC(C3=C(OC4([H])C([H])([H])C([H])([H])N([H])C([H])([H])C4([H])[H])C4C(=C([H])C([H])=C([H])C=4[H])S3)=NO2)C([H])=C([H])C=1[H]	Inactive
C([H])([H])([H])N1C(C(N([H])C([H])([H])C([H])([H])N2C([H])([H])C([H])([H])OC([H])([H])C2([H])[H])=O)=C([H])C(N([H])C(C2N(C([H])([H])[H])C([H])=C(N([H])C(C3C([H])=C([H])C(C([H])=C([H])C4C([H])=C([H])C(F)=C([H])C=4[H])=C([H])C=3[H])=O)C=2[H])=O)=C1[H]	Inactive
C([H])([H])([H])N1C(C(N([H])C([H])([H])C([H])([H])N2C([H])([H])C([H])([H])OC([H])([H])C2([H])[H])=O)=C([H])C(N([H])C(C2N(C([H])([H])[H])C([H])=C(N([H])C(C3C([H])=C([H])C(C([H])=C([H])C4C([H])=C(F)C([H])=C([H])C=4[H])=C([H])C=3[H])=O)C=2[H])=O)=C1[H]	Inactive
C([H])([H])([H])N(C([H])([H])C([H])([H])C([H])([H])N([H])C(C1N(C([H])([H])[H])C([H])=C(N([H])C(C2N(C([H])([H])[H])C([H])=C(N([H])C(C3N(C([H])([H])[H])C([H])=C(N([H])C(C4N=C([H])C5C(=C([H])C([H])=C([H])C=5[H])C=4[H])=N[H])C=3[H])=O)C=2[H])=O)C=1[H])=O)C([H])([H])[H]	Inactive
C([H])([H])([H])OC([H])(OC([H])([H])[H])C([H])([H])N1N=NC(C([H])([H])OC([H])(C2C3C(=C([H])C([H])=C(C=3[H])OC([H])([H])[H])N=C([H])C=2[H])C2([H])N3C([H])([H])C([H])(C([H])(C([H])([H])C3([H])[H])C2([H])[H])C([H])=C([H])[H])=C1[H]	Inactive
O=C(N([H])C([H])([H])C1C([H])=C([H])C([H])=C([H])C=1[H])N([H])C([H])([H])C([H])([H])C([H])([H])N([H])C([H])([H])C([H])([H])C([H])([H])C([H])([H])N([H])C([H])([H])C([H])([H])C([H])([H])N([H])C(N([H])C([H])([H])C1C([H])=C([H])C([H])=C([H])C=1[H])=O	Inactive
C([H])([H])([H])OC1C([H])=C(OC([H])([H])[H])C([H])=C(C([H])([H])C2=NC(C3=C(OC4([H])C([H])([H])C([H])([H])N([H])C([H])([H])C4([H])[H])C4C(=C([H])C([H])=C([H])C=4[H])S3)=NO2)C=1[H]	Inactive
C([H])([H])([H])N1C(C(N([H])C([H])([H])C([H])([H])N2C([H])([H])C([H])([H])OC([H])([H])C2([H])[H])=O)=C([H])C(N([H])C(C2N(C([H])([H])[H])C([H])=C(N([H])C(C3C([H])=C([H])C(C([H])=C([H])C4C([H])=C([H])C(C(F)(F)F)=C([H])C=4[H])=C([H])C=3[H])=O)C=2[H])=O)=C1[H]	Inactive
C([H])([H])(C1C([H])=C([H])C([H])=C([H])C=1[H])C([H])([H])C1N=C(C2=C(OC3([H])C([H])([H])C([H])([H])N([H])C([H])([H])C3([H])[H])C3C(=C([H])C([H])=C([H])C=3[H])S2)ON=1	Inactive
C([H])([H])([H])OC1C([H])=C(C([H])([H])C([H])([H])OC(C2=C(OC3([H])C([H])([H])C([H])([H])N([H])C([H])([H])C3([H])[H])C3C(=C([H])C([H])=C([H])C=3[H])S2)=O)C([H])=C([H])C=1[H]	Inactive
C([H])([H])([H])N1C(C(N([H])C([H])([H])C([H])([H])N2C([H])([H])C([H])([H])OC([H])([H])C2([H])[H])=O)=C([H])C(N([H])C(C2N(C([H])([H])[H])C([H])=C(N([H])C(C3N=C([H])C4C(=C([H])C([H])=C([H])C=4[H])C=3[H])=O)C=2[H])=O)=C1[H]	Inactive
O=C1C2C(=C([H])C([H])=C(C=2[H])OC2C([H])=C([H])C([H])=C([H])C=2[H])N([H])C([H])=C1[H]	Inactive
C([H])([H])([H])N(C([H])([H])C([H])([H])C([H])([H])N([H])C(C1N(C([H])([H])[H])C([H])=C(N([H])C(C2N(C([H])([H])[H])C([H])=C(N([H])C(C3N=C([H])C4C(=C([H])C([H])=C([H])C=4[H])C=3[H])=O)C=2[H])=O)C=1[H])=O)C([H])([H])[H]	Inactive
C([H])([H])([H])OC1C([H])=C2C(N=C([H])C([H])=C2C([H])(C2([H])N3C([H])([H])C([H])(C([H])(C([H])([H])C3([H])[H])C2([H])[H])C([H])=C([H])[H])OC([H])([H])C2N=NN(C([H])([H])N3C4C(=C([H])C([H])=C([H])C=4[H])N=N3)C=2[H])=C([H])C=1[H]	Inactive
C([H])([H])([H])C1=C(C([H])([H])C2=NN=C(C3=C(OC4([H])C([H])([H])C([H])([H])N([H])C([H])([H])C4([H])[H])C4C(=C([H])C([H])=C([H])C=4[H])S3)O2)C(C([H])([H])[H])=NO1	Inactive
C([H])([H])([H])N(C([H])([H])C([H])([H])C([H])([H])N1C([H])=C(N([H])C(C2N(C([H])([H])[H])C([H])=C(N([H])C(C3N(C([H])([H])[H])C([H])=C(N([H])C(C4N=C([H])C5C(=C([H])C([H])=C([H])C=5[H])C=4[H])=O)C=3[H])=O)C=2[H])=O)N=C1[H])C([H])([H])[H]	Inactive
C([H])([H])([H])OC1C([H])=C2C(N=C([H])C([H])=C2C([H])(C2([H])N3C([H])([H])C([H])(C([H])(C([H])([H])C3([H])[H])C2([H])[H])C([H])=C([H])[H])OC([H])([H])C2N=NN(C([H])([H])C(N([H])C([H])(C(O[H])=O)C([H])([H])C3C([H])=C([H])C([H])=C([H])C=3[H])=O)C=2[H])=C([H])C=1[H]	Inactive
C([H])([H])([H])OC1C([H])=C(C([H])([H])C2=NN=C(C3=C(OC4([H])C([H])([H])C([H])([H])N([H])C([H])([H])C4([H])[H])C4C(=C([H])C([H])=C([H])C=4[H])S3)O2)C([H])=C([H])C=1[H]	Inactive
O=C(C1=C(OC2([H])C([H])([H])C([H])([H])N([H])C([H])([H])C2([H])[H])C2C(=C([H])C([H])=C([H])C=2[H])S1)OC([H])([H])C([H])([H])C1C([H])=C([H])C([H])=C([H])C=1[H]	Inactive
C([H])([H])([H])OC1C([H])=C2C(N=C([H])C([H])=C2C([H])(C2([H])N3C([H])([H])C([H])(C([H])(C([H])([H])C3([H])[H])C2([H])[H])C([H])=C([H])[H])OC([H])([H])C2N=NN(C3N=C([H])C([H])=C([H])C=3[H])C=2[H])=C([H])C=1[H]	Inactive
O([H])C([H])([H])C([H])([H])N([H])C(C1N=C([H])C(OC2C([H])=C3C(C([H])([H])OB3O[H])=C([H])C=2[H])=NC=1[H])=O	Inactive
C([H])([H])([H])N1C(C(N([H])C([H])([H])C([H])([H])N2C([H])([H])C([H])([H])OC([H])([H])C2([H])[H])=O)=C([H])C(N([H])C(C2N(C([H])([H])[H])C([H])=C(N([H])C(C3C([H])=C([H])C(C([H])=C([H])C4=C([H])C5C(=NSN=5)C([H])=C4[H])=C([H])C=3[H])=O)C=2[H])=O)=C1[H]	Inactive
C([H])([H])([H])N(C([H])([H])C([H])([H])C([H])([H])N([H])C(C1N(C([H])([H])[H])C([H])=C(N([H])C(C2N(C([H])([H])[H])C([H])=C(N([H])C(C3N(C([H])([H])[H])C([H])=C(N([H])C(C([H])([H])[H])=N[H])C=3[H])=O)C=2[H])=O)C=1[H])=O)C([H])([H])[H]	Inactive
O=C1C2C(=C([H])C(=C([H])C=2[H])OC2C([H])=C([H])C([H])=C([H])C=2[H])N([H])C([H])=C1[H]	Inactive
O([H])C([H])(C1=NN=C(C2=C(OC3([H])C([H])([H])C([H])([H])N([H])C([H])([H])C3([H])[H])C3C(=C([H])C([H])=C([H])C=3[H])S2)O1)C1C([H])=C([H])C([H])=C([H])C=1[H]	Inactive
C([H])([H])([H])OC1C([H])=C2C(N=C([H])C([H])=C2C([H])(C2([H])N3C([H])([H])C([H])(C([H])(C([H])([H])C3([H])[H])C2([H])[H])C([H])=C([H])[H])OC([H])([H])C2N=NN(C([H])(C(O[H])=O)C([H])([H])C3C([H])=C([H])C([H])=C([H])C=3[H])C=2[H])=C([H])C=1[H]	Inactive
C([H])([H])([H])N1C(C(N([H])C([H])([H])C([H])([H])C([H])([H])N2C([H])([H])C([H])([H])OC([H])([H])C2([H])[H])=O)=C([H])C(N([H])C(C2N(C([H])([H])[H])C([H])=C(N([H])C(C3N(C([H])([H])[H])C([H])=C(N([H])C(C4N=C([H])C5C(=C([H])C([H])=C([H])C=5[H])C=4[H])=O)C=3[H])=O)C=2[H])=O)=C1[H]	Inactive
O=C1C2C(=C([H])C(=C([H])C=2[H])OC2C([H])=C([H])C([H])=C([H])C=2[H])N([H])C([H])=C1C#N	Inactive
C([H])([H])([H])OC1C([H])=C2C(N=C([H])C([H])=C2C([H])(C2([H])N3C([H])([H])C([H])(C([H])(C([H])([H])C3([H])[H])C2([H])[H])C([H])=C([H])[H])OC([H])([H])C2N=NN(C([H])(C(O[H])=O)C([H])([H])C3C4C(=C([H])C([H])=C([H])C=4[H])N([H])C=3[H])C=2[H])=C([H])C=1[H]	Inactive
C([H])([H])(C1=NN=C(C2=C(OC3([H])C([H])([H])C([H])([H])N([H])C([H])([H])C3([H])[H])C3C(=C([H])C([H])=C([H])C=3[H])S2)O1)C1C([H])=C([H])C([H])=C([H])C=1[H]	Inactive
C([H])([H])([H])OC1C([H])=C(C(N([H])C2=C([H])N(C([H])([H])[H])C(C(N([H])C3=C([H])N(C([H])(C([H])([H])[H])C([H])([H])[H])C(C(N([H])C4=C([H])N(C([H])([H])[H])C(C(N([H])C([H])([H])C([H])([H])C([H])([H])N(C([H])([H])[H])C([H])([H])[H])=O)=C4[H])=O)=C3[H])=O)=C2[H])=N[H])C([H])=C([H])C=1[H]	Inactive
C([H])([H])([H])C([H])([H])N(C([H])([H])C([H])([H])C([H])([H])C([H])(N([H])C1C([H])=C([H])N=C([H])C=1[H])C([H])([H])[H])C([H])([H])C([H])([H])[H]	Inactive
C([H])([H])([H])OC1C([H])=C2C(N=C([H])C([H])=C2C([H])(C2([H])N3C([H])([H])C([H])(C([H])(C([H])([H])C3([H])[H])C2([H])[H])C([H])=C([H])[H])OC([H])([H])C2N=NN(C([H])([H])C(N([H])C([H])(C(O[H])=O)C([H])([H])C([H])(C([H])([H])[H])C([H])([H])[H])=O)C=2[H])=C([H])C=1[H]	Inactive
C([H])([H])([H])C([H])([H])C([H])([H])N([H])C(N([H])C([H])([H])C([H])([H])C([H])([H])N([H])C([H])([H])C([H])([H])C([H])([H])C([H])([H])C([H])([H])C([H])([H])N([H])C([H])([H])C([H])([H])C([H])([H])N([H])C(N([H])C([H])([H])C([H])([H])C([H])([H])[H])=O)=O	Inactive
C([H])([H])([H])OC1C([H])=C2C(N=C([H])C([H])=C2C([H])(C2([H])N3C([H])([H])C([H])(C([H])(C([H])([H])C3([H])[H])C2([H])[H])C([H])=C([H])[H])OC([H])([H])C2N=NN(C([H])(C(O[H])=O)C([H])(C([H])([H])[H])C([H])([H])[H])C=2[H])=C([H])C=1[H]	Inactive
C([H])([H])([H])OC1C([H])=C2C(N=C([H])C([H])=C2C([H])(C2([H])N3C([H])([H])C([H])(C([H])(C([H])([H])C3([H])[H])C2([H])[H])C([H])=C([H])[H])OC([H])([H])C2N=NN(C3C(Cl)=C([H])C([H])=C([H])C=3[H])C=2[H])=C([H])C=1[H]	Inactive
C([H])([H])([H])OC1C2=C(C([H])=C(C3C([H])=C4C(OC([H])([H])O4)=C([H])C=3[H])O2)C([H])=C(C([H])([H])C([H])([H])C([H])([H])O[H])C=1[H]	Inactive
C([H])([H])([H])OC1C([H])=C2C(N=C([H])C([H])=C2C([H])(C2([H])N3C([H])([H])C([H])(C([H])(C([H])([H])C3([H])[H])C2([H])[H])C([H])=C([H])[H])OC([H])([H])C2N=NN(C([H])(C(O[H])=O)C([H])([H])C([H])(C([H])([H])[H])C([H])([H])[H])C=2[H])=C([H])C=1[H]	Inactive
C([H])([H])([H])OC1C([H])=C2C(N=C([H])C([H])=C2C([H])(C2([H])N3C([H])([H])C([H])(C([H])(C([H])([H])C3([H])[H])C2([H])[H])C([H])=C([H])[H])OC([H])([H])C2N=NN(C([H])(C(O[H])=O)C([H])([H])[H])C=2[H])=C([H])C=1[H]	Inactive
N([H])([H])C(N([H])C([H])([H])C([H])([H])C([H])([H])N([H])C([H])([H])C([H])([H])C([H])([H])C([H])([H])N([H])C([H])([H])C([H])([H])C([H])([H])N([H])C(N([H])[H])=N[H])=N[H]	Inactive
N([H])([H])C(N([H])C([H])([H])C([H])([H])C([H])([H])N([H])C([H])([H])C([H])([H])C([H])([H])N([H])C([H])([H])C([H])([H])C([H])([H])N([H])C(N([H])[H])=N[H])=N[H]	Inactive
N([H])([H])C(C1C([H])=C([H])C(C2=C([H])C([H])=C(C3C([H])=C([H])C(F)=C([H])C=3[H])O2)=C([H])C=1[H])=N[H]	Inactive
C([H])([H])([H])C1C([H])=C([H])C(C2=C([H])C([H])=C(C3C([H])=C([H])C(C(N([H])[H])=N[H])=C([H])C=3[H])O2)=C([H])C=1[H]	Inactive
FC1C(N([H])C2N=C([H])C(C3N4C(C([H])=C([H])C(=N4)N([H])C([H])([H])C([H])([H])N4C([H])([H])C([H])([H])OC([H])([H])C4([H])[H])=NC=3[H])=C([H])N=2)=NC([H])=C([H])C=1[H]	Inactive
FC1C(N([H])C2N=C([H])C(C3N4C(C([H])=C([H])C(=N4)N([H])C([H])([H])C([H])([H])N4C([H])([H])C([H])([H])C([H])([H])C4([H])[H])=NC=3[H])=C([H])N=2)=NC([H])=C([H])C=1[H]	Inactive
C([H])([H])([H])C1=NN2C(=NC([H])=C2C2C([H])=NC(N([H])C3C(F)=C([H])C([H])=C([H])N=3)=NC=2[H])C([H])=C1[H]	Inactive
C([H])([H])([H])N1C([H])([H])C([H])(OC2=NN3C(=NC([H])=C3C3C([H])=NC(N([H])C4C(F)=C([H])C([H])=C([H])N=4)=NC=3[H])C([H])=C2[H])C([H])([H])C1([H])[H]	Inactive
C([H])([H])([H])N1C([H])([H])C([H])([H])C([H])(OC2=NN3C(=NC([H])=C3C3C([H])=NC(N([H])C4C(F)=C([H])C([H])=C([H])N=4)=NC=3[H])C([H])=C2[H])C([H])([H])C1([H])[H]	Inactive
C([H])([H])([H])C([H])(N(C(N1C(C([H])([H])[H])=NC(S(C2([H])C3([H])C([H])([H])C([H])(C([H])([H])C3([H])[H])C2([H])[H])(=O)=O)=N1)=O)C([H])([H])[H])C([H])([H])[H]	Inactive
C([H])([H])([H])C([H])(N(C(N1N=C(S(C2([H])C3([H])C([H])([H])C([H])(C([H])([H])C3([H])[H])C2([H])[H])(=O)=O)N=C1[H])=O)C([H])(C([H])([H])[H])C([H])([H])[H])C([H])([H])[H]	Inactive
C([H])([H])([H])N(C(C([H])([H])[H])(C([H])([H])[H])C([H])([H])[H])C(N1N=C(S(C2([H])C3([H])C([H])([H])C([H])(C([H])([H])C3([H])[H])C2([H])[H])(=O)=O)N=C1[H])=O	Inactive
C([H])([H])([H])C([H])(C([H])([H])C([H])(C(N([H])C([H])(C(N1C(C([H])([H])OC2C([H])=C([H])C(F)=C([H])C=2[H])=NC([H])([H])C1([H])[H])=O)C([H])([H])C1C2C(=C([H])C([H])=C([H])C=2[H])N([H])C=1[H])=O)N([H])C(C([H])(N([H])C(N1C([H])([H])C([H])([H])OC([H])([H])C1([H])[H])=O)C([H])([H])C([H])(C([H])([H])[H])C([H])([H])[H])=O)C([H])([H])[H]	Inactive
C([H])([H])([H])N(C1C([H])=C([H])C([H])=C([H])C=1[H])C(N1N=C(SC2([H])C3([H])C([H])([H])C([H])(C([H])([H])C3([H])[H])C2([H])[H])N=C1[H])=O	Inactive
C([H])([H])([H])OC1C([H])=C([H])C(C2(C(=O)N(C3([H])C([H])([H])C([H])([H])N([H])C([H])([H])C3([H])[H])C(=N[H])N2[H])C2C([H])=C([H])C(OC([H])([H])[H])=C([H])C=2[H])=C([H])C=1[H]	Inactive
O=C(N1N=C(S(C2([H])C3([H])C([H])([H])C([H])(C([H])([H])C3([H])[H])C2([H])[H])(=O)=O)N=C1[H])N1C([H])([H])C2C(=C([H])C([H])=C([H])C=2[H])C([H])([H])C1([H])[H]	Inactive
C([H])([H])([H])C([H])(C([H])([H])C([H])(C(N([H])C([H])(C1C([H])=C([H])C([H])=C([H])C=1[H])C(N1C(C([H])([H])OC2C([H])=C([H])C(F)=C([H])C=2[H])=NC([H])([H])C1([H])[H])=O)=O)N([H])C(C([H])(N([H])C(N1C([H])([H])C([H])([H])OC([H])([H])C1([H])[H])=O)C([H])([H])C([H])(C([H])([H])[H])C([H])([H])[H])=O)C([H])([H])[H]	Inactive
C([H])([H])([H])C([H])([H])N1C(=O)C2(C([H])([H])C([H])([H])N(C([H])([H])C3C(O[H])=C([H])C([H])=C(Cl)C=3[H])C([H])([H])C2([H])[H])N([H])C1=O	Inactive
C([H])([H])([H])C([H])([H])N1C(=O)C2(C([H])([H])C([H])([H])N(C(C3N=C([H])C([H])=C([H])C=3[H])=O)C([H])([H])C2([H])[H])N(C([H])([H])C([H])([H])C([H])(C([H])([H])[H])C([H])([H])[H])C1=O	Inactive
N([H])([H])C(C([H])(C1C([H])=C2C(C([H])=C([H])C([H])=C2[H])=C([H])C=1[H])O[H])=NN=C([H])C1C([H])=C([H])C([H])=C([H])C=1[H]	Inactive
N([H])([H])C(C([H])([H])C([H])(C1C([H])=C2C(C([H])=C([H])C([H])=C2[H])=C([H])C=1[H])O[H])=NN=C([H])C1=C([H])C([H])=C([H])O1	Inactive
C([H])([H])([H])C([H])([H])N1C(=O)C2(C([H])([H])C([H])([H])N([H])C([H])([H])C2([H])[H])N(C([H])([H])C([H])([H])C([H])(C([H])([H])[H])C([H])([H])[H])C1=O	Inactive
C([H])([H])([H])C([H])([H])N1C(=O)C2(C([H])([H])C([H])([H])N(C([H])([H])C3C4C(=C([H])C([H])=C([H])N=4)C([H])=C([H])C=3[H])C([H])([H])C2([H])[H])N(C([H])([H])C([H])([H])C([H])(C([H])([H])[H])C([H])([H])[H])C1=O	Inactive
C([H])([H])([H])C([H])([H])N1C(=O)C2(C([H])([H])C([H])([H])N(C([H])([H])C([H])([H])C([H])([H])O[H])C([H])([H])C2([H])[H])N(C([H])([H])C([H])([H])C([H])(C([H])([H])[H])C([H])([H])[H])C1=O	Inactive
N([H])([H])C(C([H])([H])C([H])(C1C([H])=C2C(C([H])=C([H])C([H])=C2[H])=C([H])C=1[H])O[H])=NN=C([H])C1C([H])=C([H])C(C(F)(F)F)=C([H])C=1[H]	Inactive
C([H])([H])([H])C12C([H])([H])C([H])([H])C3([H])C(C([H])=C(C3(C1([H])[H])C([H])([H])C([H])([H])C2([H])[H])N([H])C([H])=O)(C([H])([H])[H])C([H])([H])[H]	Inactive
C([H])([H])([H])C([H])([H])N1C(=O)C2(C([H])([H])C([H])([H])N(C([H])([H])C3C(N([H])[H])=NC([H])=C([H])C=3[H])C([H])([H])C2([H])[H])N(C([H])([H])C([H])([H])C([H])(C([H])([H])[H])C([H])([H])[H])C1=O	Inactive
C([H])([H])([H])C([H])(C([H])([H])C([H])([H])N1C2(C([H])([H])C([H])([H])N(C([H])([H])C3C(O[H])=C([H])C([H])=C(Cl)C=3[H])C([H])([H])C2([H])[H])C(=O)N([H])C1=O)C([H])([H])[H]	Inactive
O=C1C2C(=C([H])C([H])=C(C=2[H])OC2C([H])=C([H])C([H])=C([H])C=2[H])N([H])C([H])=C1C#N	Inactive
C([H])([H])([H])N(C(C([H])([H])C([H])([H])C([H])(P(OC([H])([H])OC(OC(C([H])([H])[H])(C([H])([H])[H])C([H])([H])[H])=O)(OC([H])([H])OC(OC(C([H])([H])[H])(C([H])([H])[H])C([H])([H])[H])=O)=O)C1C([H])=C(F)C(F)=C([H])C=1[H])=O)OC(N1C([H])([H])C([H])([H])OC([H])([H])C1([H])[H])=O	Inactive
C([H])([H])([H])C([H])([H])N1C(=O)C2(C([H])([H])C([H])([H])N(C(C3C(O[H])=C([H])C([H])=C(Cl)C=3[H])=O)C([H])([H])C2([H])[H])N(C([H])([H])C([H])([H])C([H])(C([H])([H])[H])C([H])([H])[H])C1=O	Inactive
N([H])([H])C(C([H])([H])C([H])(C1C([H])=C2C(C([H])=C([H])C([H])=C2[H])=C([H])C=1[H])O[H])=NN=C([H])C1C([H])=NC([H])=C([H])C=1[H]	Inactive
C([H])([H])([H])C([H])([H])N1C(=O)C2(C([H])([H])C([H])([H])N(C([H])([H])C3C(N([H])[H])=NC([H])=C(Cl)C=3[H])C([H])([H])C2([H])[H])N(C([H])([H])C([H])([H])C([H])(C([H])([H])[H])C([H])([H])[H])C1=O	Inactive
C([H])([H])([H])C([H])([H])N1C(=O)C2(C([H])([H])C([H])([H])N(C([H])([H])C3N=C([H])C([H])=C([H])C=3[H])C([H])([H])C2([H])[H])N(C([H])([H])C([H])([H])C([H])(C([H])([H])[H])C([H])([H])[H])C1=O	Inactive
C([H])([H])([H])C12C([H])([H])C([H])([H])C3([H])C([H])(C([H])([H])C3(C([H])([H])[H])C([H])([H])[H])C(N=C=S)(C1([H])[H])C([H])([H])C([H])([H])C2([H])[H]	Inactive
C([H])([H])([H])C([H])([H])N1C([H])([H])C([H])([H])C([H])(OC2C(C3=NC(C([H])([H])C4=C(C([H])([H])[H])N(C([H])([H])[H])N=C4C([H])([H])[H])=NO3)=C([H])C([H])=C([H])N=2)C([H])([H])C1([H])[H]	Inactive
C([H])([H])([H])C1C([H])=C([H])C(S(N([H])C2C([H])=C([H])C([H])=C([H])C=2[H])(=O)=O)=C([H])C=1[H]	Inactive
C([H])([H])([H])C([H])([H])OC(C([H])=C([H])C1C([H])=C(N([H])C(N([H])C2C([H])=C([H])C([H])=C([H])C=2[H])=S)C([H])=C([H])C=1[H])=O	Inactive
S=C(N([H])C1C([H])=C([H])C([H])=C([H])C=1[H])N([H])C1C([H])=C([H])C([H])=C([H])C=1[H]	Inactive
C([H])([H])([H])C1=C([H])C([H])=C(C(C([H])=C([H])C2C([H])=C([H])C(C(N3C([H])([H])C([H])([H])OC([H])([H])C3([H])[H])=O)=C([H])C=2[H])=O)O1	Inactive
C([H])([H])([H])N1C([H])([H])C([H])([H])C([H])(OC2C(C3=NC(C([H])([H])C4=C(C([H])([H])[H])N(C([H])([H])[H])N=C4C([H])([H])[H])=NO3)=C([H])C([H])=C([H])N=2)C([H])([H])C1([H])[H]	Inactive
C([H])([H])([H])C([H])([H])OC(C1C(=O)C2C(=C([H])C([H])=C3C=2N=C(C2C([H])=C([H])C(F)=C([H])C=2[H])C(C2C([H])=C([H])C(F)=C([H])C=2[H])=N3)N(C([H])([H])C2C([H])=C([H])C(C(F)(F)F)=C([H])C=2[H])C=1[H])=O	Inactive
O([H])N([H])C(C([H])([H])C([H])([H])C([H])(P(O[H])(O[H])=O)N([H])C(C1C([H])=C([H])C([H])=C([H])C=1[H])=O)=O	Inactive
C([H])([H])([H])C1([H])C([H])(O[H])C([H])(O[H])C([H])(O[H])C([H])(OC2([H])C3([H])C([H])(OC([H])([H])C([H])(C4C([H])=C(O[H])C(O[H])=C([H])C=4[H])O3)OC([H])(C([H])([H])OC(C([H])=C([H])C3C([H])=C(O[H])C(O[H])=C([H])C=3[H])=O)C2([H])O[H])O1	Inactive
O([H])C(C1C(=O)C2C(=C([H])C([H])=C3C=2N=C(C2C([H])=C([H])C(F)=C([H])C=2[H])C(C2C([H])=C([H])C(F)=C([H])C=2[H])=N3)N(C([H])([H])C(F)(F)F)C=1[H])=O	Inactive
O([H])C1C(N([H])C(C([H])([H])C([H])([H])C([H])(P(O[H])(O[H])=O)C2C([H])=C([H])C([H])=C([H])C=2[H])=O)=C([H])C([H])=C([H])C=1[H]	Inactive
O([H])C(C1C(=O)C2C(=C([H])C([H])=C3C=2N=C(C2C([H])=C([H])C(F)=C([H])C=2[H])C(C2C([H])=C([H])C(F)=C([H])C=2[H])=N3)N(C([H])([H])C2C([H])=C([H])C(F)=C([H])C=2[H])C=1[H])=O	Inactive
O([H])C(C1C(=O)C2C(=C([H])C([H])=C3C=2N=C(C2C([H])=C([H])C(F)=C([H])C=2[H])C(C2C([H])=C([H])C(F)=C([H])C=2[H])=N3)N(C([H])([H])C2C([H])=C([H])C(C(F)(F)F)=C([H])C=2[H])C=1[H])=O	Inactive
O([H])P(C([H])([H])C([H])([H])C([H])(P(O[H])(O[H])=O)C1C2C(=C([H])C([H])=C([H])C=2[H])C([H])=C([H])C=1[H])(O[H])=O	Inactive
C([H])([H])([H])N(C(C([H])([H])C([H])([H])C([H])(P(O[H])(O[H])=O)N([H])C(C1C([H])=C([H])C([H])=C([H])C=1[H])=O)=O)O[H]	Inactive
C([H])([H])([H])OC1C([H])=C([H])C(C([H])(P(O[H])(O[H])=O)OC([H])([H])C(N([H])O[H])=O)=C([H])C=1[H]	Inactive
C([H])([H])([H])C([H])([H])C([H])([H])C([H])([H])N1C2C([H])=C([H])C3C(C=2C(=O)C(C(OC([H])([H])C([H])([H])[H])=O)=C1[H])=NC(C1C([H])=C([H])C(F)=C([H])C=1[H])=C(C1C([H])=C([H])C(F)=C([H])C=1[H])N=3	Inactive
O([H])C(C1C(=O)C2C(=C([H])C([H])=C3C=2N=C(C2C([H])=C([H])C(F)=C([H])C=2[H])C(C2C([H])=C([H])C(F)=C([H])C=2[H])=N3)N(C([H])([H])C#C[H])C=1[H])=O	Inactive
C([H])([H])([H])N(C(C([H])([H])C([H])([H])C([H])([H])C([H])(P(O[H])(O[H])=O)C1C([H])=C([H])C([H])=C([H])C=1[H])=O)O[H]	Inactive
C([H])([H])([H])C([H])([H])N1C2C([H])=C([H])C3C(C=2C(=O)C(C(O[H])=O)=C1[H])=NC(C1C([H])=C([H])C(F)=C([H])C=1[H])=C(C1C([H])=C([H])C(F)=C([H])C=1[H])N=3	Inactive
C([H])([H])([H])C([H])(C([H])([H])C([H])(C([H])(C([H])([H])C(N([H])C1([H])C([H])([H])C([H])([H])C([H])([H])C([H])([H])C1([H])[H])=O)O[H])N([H])C(C([H])(N([H])C(C([H])(N([H])C(OC([H])([H])C1C([H])=C([H])C([H])=C([H])C=1[H])=O)C([H])([H])C([H])([H])C([H])([H])N([H])[H])=O)C([H])([H])[H])=O)C([H])([H])[H]	Inactive
C([H])([H])([H])C(C1C([H])=C2C(SC([H])([H])C3([H])C2([H])OC([H])(C([H])([H])OC([H])([H])C2C([H])=C([H])C([H])=C([H])C=2[H])C([H])(OC([H])([H])C2C([H])=C([H])C([H])=C([H])C=2[H])C3([H])OC([H])([H])C2C([H])=C([H])C([H])=C([H])C=2[H])=C([H])C=1[H])(C([H])([H])[H])C([H])([H])[H]	Inactive
C([H])([H])(C1([H])C([H])(OC([H])([H])C2C([H])=C([H])C([H])=C([H])C=2[H])C([H])(OC([H])([H])C2C([H])=C([H])C([H])=C([H])C=2[H])C2([H])C([H])([H])SC3C(C2([H])O1)=C1C(C([H])=C([H])C([H])=C1[H])=C([H])C=3[H])OC([H])([H])C1C([H])=C([H])C([H])=C([H])C=1[H]	Inactive
C([H])([H])([H])C([H])(C([H])([H])C([H])(C#N)N([H])C(N([H])C1C(=O)N2C(C([H])=C([H])C([H])=C2[H])=NC=1[H])=O)C([H])([H])[H]	Inactive
FC(C1C([H])=C([H])C(C([H])([H])N([H])C(N([H])C2C(=O)N3C(C([H])=C([H])C(Cl)=C3[H])=NC=2[H])=O)=C([H])C=1[H])(F)F	Inactive
C([H])([H])([H])C([H])(C([H])([H])C([H])(C(N([H])[H])=O)N([H])C(N([H])C1C(=O)N2C(C([H])=C([H])C([H])=C2[H])=NC=1[H])=O)C([H])([H])[H]	Inactive
O=C(OC([H])([H])C1C([H])=C2C(OC([H])([H])O2)=C([H])C=1[H])N([H])C1C(=O)N2C(C([H])=C([H])C([H])=C2[H])=NC=1[H]	Inactive
O([H])S1([H])C2C(=C([H])C([H])=C([H])C=2[H])C2([H])C([H])(C([H])(C([H])(C([H])(O2)C([H])([H])OC([H])([H])C2C([H])=C([H])C([H])=C([H])C=2[H])OC([H])([H])C2C([H])=C([H])C([H])=C([H])C=2[H])OC([H])([H])C2C([H])=C([H])C([H])=C([H])C=2[H])C1([H])[H]	Inactive
FC(C1C(C([H])([H])N([H])C(C2C(=O)N3C(C([H])=C([H])C([H])=C3[H])=NC=2[H])=O)=C([H])C([H])=C([H])C=1[H])(F)F	Inactive
FC1C([H])=C(C([H])([H])OC(N([H])C2C(=O)N3C(C([H])=C([H])C(Cl)=C3[H])=NC=2[H])=O)C([H])=C([H])C=1[H]	Inactive
O=C(C1C(=O)N2C(C([H])=C([H])C([H])=C2[H])=NC=1[H])N([H])C([H])([H])C([H])([H])N1C([H])([H])C([H])([H])OC([H])([H])C1([H])[H]	Inactive
N([H])([H])C(C([H])(N([H])C(N([H])C1C(=O)N2C(C([H])=C([H])C([H])=C2[H])=NC=1[H])=O)C([H])([H])C1C([H])=C([H])C([H])=C([H])C=1[H])=O	Inactive
O=C(C1C(=O)N2C(C([H])=C([H])C([H])=C2[H])=NC=1[H])N([H])C1([H])C([H])([H])C([H])([H])N(C([H])([H])C2C([H])=C([H])C([H])=C([H])C=2[H])C([H])([H])C1([H])[H]	Inactive
C([H])([H])([H])OC([H])([H])C([H])([H])N([H])C(N([H])C1C(=O)N2C(C([H])=C([H])C(Cl)=C2[H])=NC=1[H])=O	Inactive
C([H])([H])([H])C(C1C([H])=C2C3([H])C([H])(C([H])([H])S(C2=C([H])C=1[H])(=O)=O)C([H])(O[H])C([H])(O[H])C([H])(C([H])([H])O[H])O3)(C([H])([H])[H])C([H])([H])[H]	Inactive
C([H])([H])([H])OC1C([H])=C([H])C(C([H])(N([H])C(C2C(=O)N3C(C([H])=C([H])C([H])=C3[H])=NC=2[H])=O)C([H])([H])[H])=C([H])C=1[H]	Inactive
FC(C1C([H])=C(C([H])([H])N([H])C(N([H])C2C(=O)N3C(C([H])=C([H])C(Cl)=C3[H])=NC=2[H])=O)C([H])=C([H])C=1[H])(F)F	Inactive
C([H])([H])([H])C(C([H])([H])OC([H])([H])C1([H])C([H])(OC(C([H])([H])[H])=O)C([H])(OC(C([H])([H])[H])=O)C2([H])C([H])([H])SC3C(C2([H])O1)=C([H])C(C(C([H])([H])[H])(C([H])([H])[H])C([H])([H])[H])=C([H])C=3[H])=O	Inactive
C([H])([H])([H])C([H])(N(C(N([H])C1C(=O)N2C(C([H])=C([H])C(Cl)=C2[H])=NC=1[H])=O)C([H])([H])C1C([H])=C([H])C([H])=C([H])C=1[H])C([H])([H])[H]	Inactive
C([H])([H])([H])OC1C([H])=C([H])C(C2C([H])=C([H])C3=NC([H])=C(C(N3C=2[H])=O)C(N([H])C([H])([H])C2C([H])=C(F)C([H])=C([H])C=2[H])=O)=C([H])C=1[H]	Inactive
ClC1C([H])=C([H])C2=NC([H])=C(C(N2C=1[H])=O)N([H])C(OC([H])([H])C1N=C([H])C([H])=C([H])C=1[H])=O	Inactive
C([H])([H])([H])C(C1C([H])=C2C(SC([H])([H])C3([H])C2([H])OC([H])(C([H])([H])O[H])C([H])(O[H])C3([H])O[H])=C([H])C=1[H])(C([H])([H])[H])C([H])([H])[H]	Inactive
C([H])([H])([H])C([H])(N(C(N([H])C1C(=O)N2C(C([H])=C(C([H])=C2[H])C([H])([H])[H])=NC=1[H])=O)C([H])([H])C1C([H])=C([H])C([H])=C([H])C=1[H])C([H])([H])[H]	Inactive
C([H])([H])([H])OC1C([H])=C([H])C(C([H])([H])N([H])C(C2C(=O)N3C(C([H])=C([H])C([H])=C3[H])=NC=2[H])=O)=C([H])C=1[H]	Inactive
FC(C1C([H])=C([H])C(C([H])([H])N([H])C(N([H])C2C(=O)N3C(C([H])=C([H])C([H])=C3[H])=NC=2[H])=O)=C([H])C=1[H])(F)F	Inactive
C([H])([H])([H])C([H])([H])C([H])([H])C([H])([H])C([H])([H])OC1C(N([H])C(C2C(=O)N3C(C([H])=C([H])C([H])=C3[H])=NC=2[H])=O)=NC([H])=C([H])C=1[H]	Inactive
O=C(N([H])C1C(=O)N2C(C([H])=C([H])C([H])=C2[H])=NC=1[H])N([H])C([H])(C#N)C([H])([H])C1C([H])=C([H])C([H])=C([H])C=1[H]	Inactive
ClC1C([H])=C([H])C2=NC([H])=C(C(N2C=1[H])=O)N([H])C(N([H])C([H])([H])C1SC([H])=C([H])C=1[H])=O	Inactive
C([H])([H])([H])C1C([H])=C2C(SC([H])([H])C3([H])C2([H])OC([H])(C([H])([H])OC([H])([H])C2C([H])=C([H])C([H])=C([H])C=2[H])C([H])(OC([H])([H])C2C([H])=C([H])C([H])=C([H])C=2[H])C3([H])OC([H])([H])C2C([H])=C([H])C([H])=C([H])C=2[H])=C([H])C=1[H]	Inactive
ClC1C([H])=C([H])C2=NC([H])=C(C(N2C=1[H])=O)N([H])C(OC([H])([H])C1C([H])=NC([H])=C([H])C=1[H])=O	Inactive
C([H])([H])([H])C(N1C(=O)C(C2C([H])=C([H])C([H])=C([H])C=2[H])(C2C([H])=C([H])C([H])=C([H])C=2[H])N([H])C1=N[H])(C([H])([H])[H])C([H])([H])[H]	Inactive
O=C(N1C([H])([H])C([H])([H])N(C2C(C(N([H])C3([H])C([H])([H])C3([H])[H])=O)=C([H])C([H])=C([H])N=2)C([H])([H])C1([H])[H])N([H])C1C(=O)N2C(C([H])=C([H])C([H])=C2[H])=NC=1[H]	Inactive
O=C(N([H])C1C(OC([H])([H])C2C([H])=C([H])C([H])=C([H])C=2[H])=C([H])C([H])=C([H])N=1)N([H])C1C(=O)N2C(C([H])=C([H])C([H])=C2[H])=NC=1[H]	Inactive
C([H])([H])([H])OC1C([H])=C2C(SC([H])([H])C3([H])C2([H])OC([H])(C([H])([H])OC([H])([H])C2C([H])=C([H])C([H])=C([H])C=2[H])C([H])(OC([H])([H])C2C([H])=C([H])C([H])=C([H])C=2[H])C3([H])OC([H])([H])C2C([H])=C([H])C([H])=C([H])C=2[H])=C([H])C=1[H]	Inactive
FC(C1C(C([H])([H])N([H])C(N([H])C2C(=O)N3C(C([H])=C([H])C(Cl)=C3[H])=NC=2[H])=O)=C([H])C([H])=C([H])C=1[H])(F)F	Inactive
C([H])([H])([H])OC1C([H])=C([H])C(C2C([H])=C([H])C3=NC([H])=C(C(N3C=2[H])=O)C(N([H])C([H])([H])C2C([H])=C([H])C(C(F)(F)F)=C([H])C=2[H])=O)=C([H])C=1[H]	Inactive
O=C(N([H])C1C(=O)N2C(C([H])=C([H])C([H])=C2[H])=NC=1[H])N([H])C([H])([H])C([H])([H])C([H])(C1C([H])=C([H])C([H])=C([H])C=1[H])C1C([H])=C([H])C([H])=C([H])C=1[H]	Inactive
C([H])([H])([H])C([H])([H])OC(C([H])(N([H])C(N([H])C1C(=O)N2C(C([H])=C([H])C([H])=C2[H])=NC=1[H])=O)C([H])([H])C1C([H])=C([H])C([H])=C([H])C=1[H])=O	Inactive
C([H])([H])([H])C(OC(N1C([H])([H])C([H])([H])N(C(N([H])C2C(=O)N3C(C([H])=C([H])C(Cl)=C3[H])=NC=2[H])=O)C([H])([H])C1([H])[H])=O)(C([H])([H])[H])C([H])([H])[H]	Inactive
FC1C(C([H])([H])N(C(C2C(=O)N3C(C([H])=C([H])C([H])=C3[H])=NC=2[H])=O)C2([H])C([H])([H])C2([H])[H])=C([H])C([H])=C([H])C=1[H]	Inactive
C([H])([H])([H])C1C2=C(C3([H])C([H])(C([H])([H])S2)C([H])(OC([H])([H])C2C([H])=C([H])C([H])=C([H])C=2[H])C([H])(OC([H])([H])C2C([H])=C([H])C([H])=C([H])C=2[H])C([H])(C([H])([H])OC([H])([H])C2C([H])=C([H])C([H])=C([H])C=2[H])O3)C([H])=C([H])C=1[H]	Inactive
ClC1C([H])=C([H])C2N(C(C(N([H])C(N3C([H])([H])C([H])([H])N(C(C4=C([H])C([H])=C([H])O4)=O)C([H])([H])C3([H])[H])=O)=C([H])N=2)=O)C=1[H]	Inactive
C([H])([H])([H])C(OC([H])([H])C1([H])C([H])(OC(C([H])([H])[H])=O)C([H])(OC(C([H])([H])[H])=O)C2([H])C([H])([H])S(C3C(C2([H])O1)=C([H])C(C(C([H])([H])[H])(C([H])([H])[H])C([H])([H])[H])=C([H])C=3[H])(=O)=O)=O	Inactive
C([H])([H])([H])C1=C(N([H])C(C2C(=O)N3C(C([H])=C([H])C([H])=C3[H])=NC=2[H])=O)C(C([H])([H])[H])=NO1	Inactive
C([H])([H])([H])OC1C([H])=C2C(C(C([H])=C(C3C([H])=C([H])C(O[H])=C([H])C=3[H])O2)=O)=C(OC2([H])C([H])(O[H])C([H])(O[H])C([H])(O[H])C([H])(C([H])([H])OC3([H])C([H])(O[H])C([H])(O[H])C([H])(O[H])C([H])([H])O3)O2)C=1[H]	Inactive
ClC1C(SC([H])([H])C(C2C3C(=C([H])C([H])=C([H])C=3[H])N([H])C=2[H])=O)=C([H])C([H])=C([H])C=1[H]	Inactive
O=C(C1C2C(=C([H])C([H])=C([H])C=2[H])N([H])C=1[H])C([H])([H])OC1C([H])=C([H])C([H])=C([H])C=1[H]	Inactive
ClC1C([H])=C([H])C(C([H])([H])SC([H])([H])C(C2C3C(=C([H])C([H])=C([H])C=3[H])N([H])C=2[H])=O)=C([H])C=1[H]	Inactive
BrC1C([H])=C([H])C(C([H])([H])SC([H])([H])C(C2C3C(=C([H])C([H])=C([H])C=3[H])N([H])C=2[H])=O)=C([H])C=1[H]	Inactive
C([H])([H])([H])OC1C2=C(C(C(C([H])([H])[H])=C(C3C([H])=NC(C4C([H])=C([H])C(OC(F)(F)F)=C([H])C=4[H])=C([H])C=3[H])N2[H])=O)C([H])=C([H])C=1[H]	Inactive
C([H])([H])([H])C1C(=O)C2C(=C(C([H])=C([H])C=2[H])O[H])N([H])C=1C1C([H])=NC(C2C([H])=C([H])C(OC(F)(F)F)=C([H])C=2[H])=C([H])C=1[H]	Inactive
C([H])([H])([H])C1C(=O)C2C(=C([H])C([H])=C([H])C=2[H])N([H])C=1C1N=C([H])C(C2C([H])=C([H])C(OC(F)(F)F)=C([H])C=2[H])=C([H])C=1[H]	Inactive
C([H])([H])([H])OC1C([H])=C2C(N([H])C(C3C([H])=NC(C4C([H])=C([H])C(OC(F)(F)F)=C([H])C=4[H])=C([H])C=3[H])=C(C2=O)C([H])([H])[H])=C([H])C=1[H]	Inactive
C([H])([H])([H])OC1C([H])=C2C(C(C(C([H])([H])[H])=C(C3N=C([H])C(C4C([H])=C([H])C(OC(F)(F)F)=C([H])C=4[H])=C([H])C=3[H])N2[H])=O)=C([H])C=1[H]	Inactive
C([H])([H])([H])OC1C2=C(N([H])C(C3C([H])=NC(C4C([H])=C([H])C(OC(F)(F)F)=C([H])C=4[H])=C([H])C=3[H])=C(C2=O)C([H])([H])[H])C([H])=C([H])C=1[H]	Inactive
C([H])([H])([H])OC(C(C([H])([H])[H])=C([H])C1C([H])=C([H])C(OC2C(N([H])C(N([H])C3([H])C([H])([H])C3([H])[H])=NC3C([H])=C([H])C([H])=C([H])C=3[H])=C([H])C([H])=C([H])C=2[H])=C([H])C=1[H])=O	Inactive
C([H])([H])([H])OC(C(C([H])([H])[H])=C([H])C1C([H])=C([H])C(OC2C(N([H])C(N([H])C3([H])C([H])([H])C3([H])[H])=NC3C([H])=C(Cl)C([H])=C([H])C=3[H])=C([H])C([H])=C([H])C=2[H])=C([H])C=1[H])=O	Inactive
C([H])([H])([H])OC(C(C([H])([H])[H])=C([H])C1C([H])=C([H])C(OC2C(N([H])C(N([H])C([H])([H])C3C([H])=C([H])C([H])=C([H])C=3[H])=NC3C([H])=C([H])C([H])=C([H])C=3[H])=C([H])C([H])=C([H])C=2[H])=C([H])C=1[H])=O	Inactive
C([H])([H])([H])N1C2C(=C([H])C([H])=C([H])C=2Cl)C2C(C3C(N=2)=C([H])C([H])=C(Br)C=3[H])=C1[H]	Inactive
C([H])([H])([H])N1C2C(=C([H])C([H])=C([H])C=2Cl)C2C(C3C(N=2)=C([H])C([H])=C([H])C=3[H])=C1[H]	Inactive
C([H])([H])([H])N1C2C(=C([H])C(=C([H])C=2Cl)F)C2C(C3C(N=2)=C([H])C([H])=C(Br)C=3[H])=C1[H]	Inactive
O([H])B1C2C(=C([H])C([H])=C(C=2[H])OC2N=C([H])C([H])=NC=2[H])C([H])([H])O1	Inactive
O([H])B1C2C(=C([H])C([H])=C(C=2[H])OC2N=C([H])C(C3N([H])N=NN=3)=NC=2[H])C([H])([H])O1	Inactive
C([H])([H])([H])N(C([H])([H])C([H])([H])N([H])C(C1N=C([H])C(OC2C([H])=C3C(C([H])([H])OB3O[H])=C([H])C=2[H])=NC=1[H])=O)C([H])([H])[H]	Inactive
C([H])([H])([H])C1=NN=C(C2N=C([H])C(OC3C([H])=C4C(C([H])([H])OB4O[H])=C([H])C=3[H])=NC=2[H])O1	Inactive
N([H])([H])C(C1N=C([H])C(OC2C([H])=C3C(C([H])([H])OB3O[H])=C([H])C=2[H])=NC=1[H])=NO[H]	Inactive
C([H])([H])([H])N(C([H])([H])C1N=C([H])C(OC2C([H])=C3C(C([H])([H])OB3O[H])=C([H])C=2[H])=NC=1[H])C([H])([H])[H]	Inactive
C([H])([H])([H])C([H])([H])N([H])C(N([H])C([H])([H])C([H])([H])C([H])([H])N([H])C([H])([H])C([H])([H])C([H])([H])C([H])([H])C([H])([H])C([H])([H])N([H])C([H])([H])C([H])([H])C([H])([H])N([H])C(N([H])C([H])([H])C([H])([H])[H])=O)=O	Inactive
O([H])C1C2C(=C([H])C([H])=C([H])C=2[H])OC(=O)C=1C(C([H])=C([H])C1C(Cl)=C([H])C(Cl)=C([H])C=1[H])=O	Inactive
N([H])([H])N([H])C(C1C([H])=NC([H])=C([H])C=1[H])=O	Inactive
O([H])C1C2C(=C([H])C([H])=C([H])C=2[H])OC(=O)C=1C(C([H])=C([H])C1=C([H])C([H])=C([H])O1)=O	Inactive
O([H])C1C2C(=C([H])C([H])=C([H])C=2[H])OC(=O)C=1C(C([H])=C([H])C1C(Cl)=C([H])C([H])=C([H])C=1[H])=O	Inactive
C([H])([H])([H])OC1C(OC([H])([H])[H])=C(OC([H])([H])[H])C([H])=C(C([H])=C([H])C(C2C(=O)OC3C(=C([H])C([H])=C([H])C=3[H])C=2O[H])=O)C=1[H]	Inactive
C([H])([H])([H])C([H])([H])N1C([H])([H])C([H])([H])N(C2C(F)=C([H])C3=C(N(C4([H])C([H])([H])C4([H])[H])C([H])=C(C3=O)C(N([H])C([H])([H])C(OC([H])(C3C4C(=C([H])C([H])=C(C=4[H])OC([H])([H])[H])N=C([H])C=3[H])C3([H])N4C([H])([H])C([H])(C([H])(C([H])([H])C4([H])[H])C3([H])[H])C([H])=C([H])[H])=O)=O)N=2)C([H])([H])C1([H])[H]	Active
C([H])([H])([H])OC1C([H])=C2C(N=C([H])C([H])=C2C([H])(C2([H])N3C([H])([H])C([H])(C([H])(C([H])([H])C3([H])[H])C2([H])[H])C([H])=C([H])[H])OC(C([H])([H])N([H])C(C2C(=O)C3C4=C(C(=C(C=3[H])F)N3C([H])([H])C([H])([H])N(C([H])([H])[H])C([H])([H])C3([H])[H])C([H])([H])C([H])([H])C([H])(N4C=2[H])C([H])([H])[H])=O)=O)=C([H])C=1[H]	Active
C([H])([H])([H])OC1C([H])=C([H])C(C([H])([H])C([H])(C(N([H])C2([H])C([H])(O[H])C([H])(N3C4C(=C(N(C([H])([H])[H])C([H])([H])[H])N=C([H])N=4)N=C3[H])OC2([H])C([H])([H])O[H])=O)N([H])[H])=C([H])C=1[H]	Active
BrC1C(N(C2([H])C([H])([H])C([H])([H])C([H])([H])C([H])([H])C2([H])[H])N([H])C(C2([H])C([H])([H])C([H])([H])C3(OOC4(C5([H])C([H])([H])C6([H])C([H])([H])C([H])(C([H])([H])C4([H])C6([H])[H])C5([H])[H])OO3)C([H])([H])C2([H])[H])=O)=NC(C#N)=NC=1[H]	Active
C([H])([H])([H])OC1C([H])=C2C(C(C([H])=C(C3C([H])=C(OC([H])([H])[H])C(OC([H])([H])C4N=NN(C5C(Cl)=C([H])C(F)=C([H])C=5[H])C=4[H])=C([H])C=3[H])O2)=O)=C(OC([H])([H])[H])C=1[H]	Active
C([H])([H])([H])OC1C([H])=C2C(C(C([H])=C(C3C([H])=C(OC([H])([H])[H])C(OC([H])([H])C4N=NN(C5C(F)=C([H])C(F)=C([H])C=5[H])C=4[H])=C([H])C=3[H])O2)=O)=C(OC([H])([H])[H])C=1[H]	Active
C([H])([H])([H])OC1C([H])=C2C(C(C([H])=C(C3C([H])=C(OC([H])([H])C4N=NN(C5C(Cl)=C([H])C(F)=C([H])C=5[H])C=4[H])C(OC([H])([H])C4N=NN(C5C(Cl)=C([H])C(F)=C([H])C=5[H])C=4[H])=C([H])C=3[H])O2)=O)=C(OC([H])([H])[H])C=1[H]	Active
C([H])([H])([H])C([H])(C([H])([H])N(C1C(Br)=C([H])N=C(C#N)N=1)N([H])C(C([H])([H])C1([H])C([H])([H])C([H])([H])C2(OOC3(C4([H])C([H])([H])C5([H])C([H])([H])C([H])(C([H])([H])C3([H])C5([H])[H])C4([H])[H])OO2)C([H])([H])C1([H])[H])=O)C([H])([H])[H]	Active
C([H])([H])([H])C([H])(C([H])([H])N(C1C(Br)=C([H])N=C(C#N)N=1)N([H])C(C1([H])C([H])([H])C([H])([H])C2(OOC3(C4([H])C([H])([H])C5([H])C([H])([H])C([H])(C([H])([H])C3([H])C5([H])[H])C4([H])[H])OO2)C([H])([H])C1([H])[H])=O)C([H])([H])[H]	Active
C([H])([H])([H])OC1C([H])=C2C(C(C([H])=C(C3C([H])=C(OC([H])([H])[H])C(OC([H])([H])C4N=NN(C5C([H])=C(Cl)C(F)=C([H])C=5[H])C=4[H])=C([H])C=3[H])O2)=O)=C(OC([H])([H])[H])C=1[H]	Active
C([H])([H])([H])OC1C([H])=C2C(C(C([H])=C(C3C([H])=C(OC([H])([H])C4N=NN(C5C([H])=C(Cl)C(F)=C([H])C=5[H])C=4[H])C(OC([H])([H])C4N=NN(C5C([H])=C(Cl)C(F)=C([H])C=5[H])C=4[H])=C([H])C=3[H])O2)=O)=C(OC([H])([H])[H])C=1[H]	Active
ClC1C([H])=C2C(C(=C([H])C([H])=N2)N([H])C([H])([H])C([H])([H])C([H])([H])C([H])([H])C([H])([H])C([H])([H])N([H])C([H])([H])C2N(C3([H])C([H])([H])C3([H])[H])C([H])=C(OC([H])([H])C3C([H])=C([H])C([H])=C([H])C=3[H])C(=O)C=2[H])=C([H])C=1[H]	Active
C([H])([H])([H])OC1C([H])=C2C(N=C([H])C([H])=C2C([H])(C2([H])N3C([H])([H])C([H])(C([H])(C([H])([H])C3([H])[H])C2([H])[H])C([H])([H])C(OC2([H])C([H])(C([H])([H])[H])C3([H])C45OOC(C([H])([H])[H])(OC4([H])O2)C([H])([H])C([H])([H])C5([H])C([H])(C([H])([H])C3([H])[H])C([H])([H])[H])=O)O[H])=C([H])C=1[H]	Active
C([H])([H])([H])OC1C([H])=C2C(C(C([H])=C(C3C([H])=C(OC([H])([H])[H])C(OC([H])([H])C4N=NN(C5C([H])=C([H])C(Cl)=C([H])C=5[H])C=4[H])=C([H])C=3[H])O2)=O)=C(OC([H])([H])[H])C=1[H]	Active
ClC1C([H])=C2C(C(=C([H])C([H])=N2)N([H])C([H])([H])C([H])([H])C([H])([H])C([H])([H])N([H])C([H])([H])C2N(C3([H])C([H])([H])C3([H])[H])C([H])=C(OC([H])([H])C3C([H])=C([H])C([H])=C([H])C=3[H])C(=O)C=2[H])=C([H])C=1[H]	Active
ClC1C([H])=C2C(C(=C([H])C([H])=N2)N([H])C([H])([H])C([H])([H])C([H])([H])N([H])C([H])([H])C2N(C3([H])C([H])([H])C3([H])[H])C([H])=C(OC([H])([H])C3C([H])=C([H])C([H])=C([H])C=3[H])C(=O)C=2[H])=C([H])C=1[H]	Active
C([H])([H])([H])C([H])(C([H])([H])N(C1N=C(C#N)N=C(Cl)C=1[H])N([H])C(C1([H])C([H])([H])C([H])([H])C2(OOC3(C4([H])C([H])([H])C5([H])C([H])([H])C([H])(C([H])([H])C3([H])C5([H])[H])C4([H])[H])OO2)C([H])([H])C1([H])[H])=O)C([H])([H])[H]	Active
C([H])([H])([H])OC1C([H])=C2C(C(C([H])=C(C3C([H])=C(OC([H])([H])[H])C(OC([H])([H])C4N=NN(C5C(Cl)=C([H])C([H])=C([H])C=5[H])C=4[H])=C([H])C=3[H])O2)=O)=C(OC([H])([H])[H])C=1[H]	Active
C([H])([H])([H])N(C([H])([H])C1N(C([H])([H])[H])C([H])=C(OC([H])([H])C2C([H])=C([H])C([H])=C([H])C=2[H])C(=O)C=1[H])C([H])([H])C([H])([H])C([H])([H])N([H])C1C2C(=C([H])C(=C([H])C=2[H])Cl)N=C([H])C=1[H]	Active
C([H])([H])([H])N1C(C([H])([H])N([H])C([H])([H])C([H])([H])C([H])([H])C([H])([H])C([H])([H])C([H])([H])N([H])C2C3C(=C([H])C(=C([H])C=3[H])Cl)N=C([H])C=2[H])=C([H])C(=O)C(OC([H])([H])C2C([H])=C([H])C([H])=C([H])C=2[H])=C1[H]	Active
C([H])([H])([H])N1C(C([H])([H])N([H])C([H])([H])C([H])([H])C([H])([H])N([H])C2C3C(=C([H])C(=C([H])C=3[H])Cl)N=C([H])C=2[H])=C([H])C(=O)C(OC([H])([H])C2C([H])=C([H])C([H])=C([H])C=2[H])=C1[H]	Active
C([H])([H])([H])C([H])(C([H])([H])N(C1N=C(C#N)N=C([H])C=1[H])N([H])C(C1([H])C([H])([H])C([H])([H])C2(OOC3(C4([H])C([H])([H])C5([H])C([H])([H])C([H])(C([H])([H])C3([H])C5([H])[H])C4([H])[H])OO2)C([H])([H])C1([H])[H])=O)C([H])([H])[H]	Active
C([H])([H])([H])OC1C([H])=C([H])C(OC2C([H])=C([H])C(N([H])C(N([H])C([H])([H])C([H])([H])C([H])([H])C([H])([H])N([H])C3C4C(=C([H])C(=C([H])C=4[H])Cl)N=C([H])C=3[H])=NC3C([H])=C([H])C(Cl)=C([H])C=3[H])=C([H])C=2[H])=C([H])C=1[H]	Active
C([H])([H])([H])OC1C([H])=C([H])C(OC2C([H])=C([H])C(N([H])C(N([H])C([H])([H])C([H])([H])C([H])([H])C([H])([H])N([H])C3C4C(=C([H])C(=C([H])C=4[H])Cl)N=C([H])C=3[H])=NC3C([H])=C(Cl)C([H])=C([H])C=3[H])=C([H])C=2[H])=C([H])C=1[H]	Active
C([H])([H])([H])OC1C([H])=C([H])C(OC2C(N([H])C(N([H])C([H])([H])C([H])([H])C([H])([H])C([H])([H])N([H])C3C4C(=C([H])C(=C([H])C=4[H])Cl)N=C([H])C=3[H])=NC3C([H])=C([H])C([H])=C([H])C=3[H])=C([H])C([H])=C([H])C=2[H])=C([H])C=1[H]	Active
C([H])([H])([H])OC1C([H])=C([H])C(OC2C(N([H])C(N([H])C([H])([H])C([H])([H])C([H])([H])C([H])([H])N([H])C3C4C(=C([H])C(=C([H])C=4[H])Cl)N=C([H])C=3[H])=NC3C([H])=C([H])C(Cl)=C([H])C=3[H])=C([H])C([H])=C([H])C=2[H])=C([H])C=1[H]	Active
ClC1C([H])=C2C(C(=C([H])C([H])=N2)N([H])C2C([H])=C([H])C(N([H])C3N=C(N4C5C(=C([H])C([H])=C([H])C=5[H])C([H])([H])C([H])([H])C4([H])[H])N=C(N([H])C([H])([H])C([H])([H])C([H])([H])N4C([H])([H])C([H])([H])OC([H])([H])C4([H])[H])N=3)=C([H])C=2[H])=C([H])C=1[H]	Active
C([H])([H])([H])C([H])([H])C([H])([H])N(C(C1C([H])=C(C(N([H])C([H])(C([H])(C([H])([H])N([H])C(C2C([H])=C(OC([H])([H])[H])C([H])=C([H])C=2[H])(C([H])([H])[H])C([H])([H])[H])O[H])C([H])([H])C2C([H])=C([H])C([H])=C([H])C=2[H])=O)C([H])=C(N2S(=O)(=O)C([H])([H])C([H])([H])C([H])([H])C2([H])[H])C=1[H])=O)C([H])([H])C([H])([H])C([H])([H])[H]	Active
C([H])([H])([H])C([H])(OC1C(OC2C(F)=C([H])C([H])=C([H])C=2F)=C(C([H])([H])[H])N(C2N=NC(C3([H])C([H])([H])C3([H])[H])=C([H])C=2[H])N=1)C([H])([H])[H]	Active
C([H])([H])([H])C([H])([H])N1C2=C(C([H])=C3C(=C2[H])OC([H])([H])O3)C(=O)C(C(N([H])C([H])(C(OC([H])(C2C3C(=C([H])C([H])=C(C=3[H])OC([H])([H])[H])N=C([H])C=2[H])C2([H])N3C([H])([H])C([H])(C([H])(C([H])([H])C3([H])[H])C2([H])[H])C([H])=C([H])[H])=O)C([H])([H])[H])=O)=C1[H]	Active
ClC1C([H])=C([H])C(N=C(N([H])C2C([H])=C([H])C(OC3C(Cl)=C([H])C([H])=C(Cl)C=3[H])=C([H])C=2[H])N([H])C([H])([H])C([H])([H])C([H])([H])C([H])([H])N([H])C2C3C(=C([H])C(=C([H])C=3[H])Cl)N=C([H])C=2[H])=C([H])C=1[H]	Active
C([H])([H])([H])OC1C([H])=C([H])C(OC2C([H])=C([H])C(N([H])C(N([H])C([H])([H])C([H])([H])C([H])([H])C([H])([H])N([H])C3C4C(=C([H])C(=C([H])C=4[H])Cl)N=C([H])C=3[H])=NC3C([H])=C([H])C([H])=C([H])C=3[H])=C([H])C=2[H])=C([H])C=1[H]	Active
C([H])([H])([H])OC1C([H])=C([H])C(OC2C(N([H])C(N([H])C([H])([H])C([H])([H])C([H])([H])N([H])C3C4C(=C([H])C(=C([H])C=4[H])Cl)N=C([H])C=3[H])=NC3C([H])=C([H])C([H])=C([H])C=3[H])=C([H])C([H])=C([H])C=2[H])=C([H])C=1[H]	Active
C([H])([H])([H])N1C2=C(C(C3S(=O)(=O)C([H])=C([H])N([H])C=3C2=O)=O)C(C([H])([H])C([H])([H])N([H])[H])=C1[H]	Active
C([H])([H])([H])OC1C([H])=C([H])C(OC2C(N([H])C(N([H])C([H])([H])C([H])([H])C([H])([H])N([H])C3C4C(=C([H])C(=C([H])C=4[H])Cl)N=C([H])C=3[H])=NC3C([H])=C([H])C(Cl)=C([H])C=3[H])=C([H])C([H])=C([H])C=2[H])=C([H])C=1[H]	Active
C([H])([H])([H])OC1C([H])=C([H])C(OC2C(N([H])C(N([H])C([H])([H])C([H])([H])C([H])([H])N([H])C3C4C(=C([H])C(=C([H])C=4[H])Cl)N=C([H])C=3[H])=NC3C([H])=C(Cl)C([H])=C([H])C=3[H])=C([H])C([H])=C([H])C=2[H])=C([H])C=1[H]	Active
ClC1C([H])=C2C(C(=C([H])C([H])=N2)N([H])C2C([H])=C([H])C(N([H])C3N=C(N4C5C(=C([H])C([H])=C([H])C=5[H])C([H])([H])C([H])([H])C4([H])[H])N=C(N([H])C([H])([H])C([H])([H])N4C([H])([H])C([H])([H])OC([H])([H])C4([H])[H])N=3)=C([H])C=2[H])=C([H])C=1[H]	Active
C([H])([H])([H])C([H])(C([H])([H])C([H])(C(N([H])C([H])(C([H])=C([H])S(C([H])([H])[H])(=O)=O)C([H])([H])C([H])([H])C1C([H])=C([H])C([H])=C([H])C=1[H])=O)N([H])C(C1C([H])=C([H])C(C([H])([H])OC2([H])C([H])(C([H])([H])[H])C3([H])C45OOC(C([H])([H])[H])(OC4([H])O2)C([H])([H])C([H])([H])C5([H])C([H])(C([H])([H])C3([H])[H])C([H])([H])[H])=C([H])C=1[H])=O)C([H])([H])[H]	Active
C([H])([H])([H])C([H])([H])N1C2C(=C([H])C([H])=C([H])N=2)C(=O)C(C(N([H])C([H])(C(OC([H])(C2C3C(=C([H])C([H])=C(C=3[H])OC([H])([H])[H])N=C([H])C=2[H])C2([H])N3C([H])([H])C([H])(C([H])(C([H])([H])C3([H])[H])C2([H])[H])C([H])=C([H])[H])=O)C([H])([H])[H])=O)=C1[H]	Active
C([H])([H])([H])C1([H])C2([H])C34OOC(C([H])([H])C2([H])[H])(C([H])([H])[H])OC3([H])OC([H])(OC([H])([H])C([H])([H])N([H])C([H])([H])C([H])([H])N([H])C2C3C(=C([H])C(=C([H])C=3[H])Cl)N=C([H])C=2[H])C([H])(C4([H])C([H])([H])C1([H])[H])C([H])([H])[H]	Active
C([H])([H])([H])OC1C([H])=C([H])C(OC2C(N([H])C(N([H])C([H])([H])C([H])([H])N([H])C3C4C(=C([H])C(=C([H])C=4[H])Cl)N=C([H])C=3[H])=NC3C([H])=C(Cl)C([H])=C([H])C=3[H])=C([H])C([H])=C([H])C=2[H])=C([H])C=1[H]	Active
C([H])([H])([H])C([H])(C([H])([H])N(C1C(Br)=C([H])N=C(C#N)N=1)N([H])C(C1([H])C([H])([H])C([H])([H])C(=O)C([H])([H])C1([H])[H])=O)C([H])([H])[H]	Active
ClC1C([H])=C(OC2C(N([H])C(N([H])C([H])([H])C([H])([H])C([H])([H])C([H])([H])N([H])C3C4C(=C([H])C(=C([H])C=4[H])Cl)N=C([H])C=3[H])=NC3C([H])=C(Cl)C([H])=C([H])C=3[H])=C([H])C([H])=C([H])C=2[H])C(Cl)=C([H])C=1[H]	Active
C([H])([H])([H])N([H])C([H])([H])C([H])([H])C1C2=C(C(C3N([H])C([H])=C([H])S(=O)(=O)C=3C2=O)=O)N([H])C=1[H]	Active
ClC1C([H])=C(OC2C(N([H])C(N([H])C([H])([H])C([H])([H])C([H])([H])C([H])([H])N([H])C3C4C(=C([H])C(=C([H])C=4[H])Cl)N=C([H])C=3[H])=NC3C([H])=C([H])C([H])=C([H])C=3[H])=C([H])C([H])=C([H])C=2[H])C(Cl)=C([H])C=1[H]	Active
ClC1C([H])=C(OC2C([H])=C([H])C(N([H])C(N([H])C([H])([H])C([H])([H])C([H])([H])C([H])([H])N([H])C3C4C(=C([H])C(=C([H])C=4[H])Cl)N=C([H])C=3[H])=NC3C([H])=C([H])C([H])=C([H])C=3[H])=C([H])C=2[H])C(Cl)=C([H])C=1[H]	Active
C([H])([H])([H])N1C2=C(C(C3N([H])C([H])=C([H])S(=O)(=O)C=3C2=O)=O)C(C([H])([H])C([H])([H])N([H])[H])=C1[H]	Active
ClC1C([H])=C([H])C(N=C(N([H])C2C(OC3C(Cl)=C([H])C([H])=C(Cl)C=3[H])=C([H])C([H])=C([H])C=2[H])N([H])C([H])([H])C([H])([H])C([H])([H])C([H])([H])N([H])C2C3C(=C([H])C(=C([H])C=3[H])Cl)N=C([H])C=2[H])=C([H])C=1[H]	Active
C([H])([H])([H])OC1C([H])=C(OC([H])([H])[H])C(C(C([H])=C([H])C2C([H])=C(OC([H])([H])[H])C(OC([H])([H])C3N=NN(C4C(F)=C([H])C(F)=C([H])C=4[H])C=3[H])=C([H])C=2[H])=O)=C(O[H])C=1[H]	Active
C([H])([H])([H])OC1C([H])=C(OC([H])([H])[H])C(C(C([H])=C([H])C2C([H])=C(OC([H])([H])C3N=NN(C4C(Cl)=C([H])C(F)=C([H])C=4[H])C=3[H])C(OC([H])([H])[H])=C([H])C=2[H])=O)=C(O[H])C=1[H]	Active
C([H])([H])([H])OC1C([H])=C(OC([H])([H])[H])C(C(C([H])=C([H])C2C([H])=C(OC([H])([H])[H])C(OC([H])([H])C3N=NN(C4C(Cl)=C([H])C(F)=C([H])C=4[H])C=3[H])=C([H])C=2[H])=O)=C(O[H])C=1[H]	Active
C([H])([H])([H])OC1C([H])=C(OC([H])([H])[H])C(C(C([H])=C([H])C2C([H])=C(OC([H])([H])C3N=NN(C4C(F)=C([H])C(F)=C([H])C=4[H])C=3[H])C(OC([H])([H])C3N=NN(C4C(F)=C([H])C(F)=C([H])C=4[H])C=3[H])=C([H])C=2[H])=O)=C(O[H])C=1[H]	Active
C([H])([H])([H])OC1C([H])=C(OC([H])([H])[H])C(C(C([H])=C([H])C2C([H])=C(OC([H])([H])C3N=NN(C4C(F)=C([H])C(F)=C([H])C=4[H])C=3[H])C(OC([H])([H])[H])=C([H])C=2[H])=O)=C(O[H])C=1[H]	Active
C([H])([H])([H])C([H])([H])C([H])([H])N(C(C1C([H])=C(C(N([H])C([H])(C([H])(C([H])([H])N([H])C(C2C([H])=C(OC([H])([H])[H])C([H])=C([H])C=2[H])(C([H])([H])[H])C([H])([H])[H])O[H])C([H])([H])C2C([H])=C([H])C([H])=C([H])C=2[H])=O)C([H])=C(N2C([H])([H])C([H])([H])C([H])([H])C2([H])[H])C=1[H])=O)C([H])([H])C([H])([H])C([H])([H])[H]	Active
C([H])([H])([H])C([H])([H])OC(C1C(=O)C2C(=C([H])C(=C(C=2[H])F)N2C([H])([H])C([H])([H])N(C([H])([H])C([H])([H])C34C([H])([H])C5([H])C([H])([H])C([H])(C3([H])[H])C([H])([H])C([H])(C5([H])[H])C4([H])[H])C([H])([H])C2([H])[H])N(C2([H])C([H])([H])C2([H])[H])C=1[H])=O	Active
ClC1C([H])=C(OC2C([H])=C([H])C(N([H])C(N([H])C([H])([H])C([H])([H])C([H])([H])N([H])C3C4C(=C([H])C(=C([H])C=4[H])Cl)N=C([H])C=3[H])=NC3C([H])=C([H])C([H])=C([H])C=3[H])=C([H])C=2[H])C(Cl)=C([H])C=1[H]	Active
N([H])([H])C([H])([H])C([H])([H])C1C2=C(C(C3N([H])C([H])=C([H])S(=O)(=O)C=3C2=O)=O)N([H])C=1[H]	Active
C([H])([H])([H])OC1C([H])=C([H])C(OC2C([H])=C([H])C(N([H])C(N([H])C([H])([H])C([H])([H])N([H])C3C4C(=C([H])C(=C([H])C=4[H])Cl)N=C([H])C=3[H])=NC3C([H])=C([H])C(Cl)=C([H])C=3[H])=C([H])C=2[H])=C([H])C=1[H]	Active
ClC1C([H])=C(OC2C(N([H])C(N([H])C([H])([H])C([H])([H])C([H])([H])N([H])C3C4C(=C([H])C(=C([H])C=4[H])Cl)N=C([H])C=3[H])=NC3C([H])=C([H])C([H])=C([H])C=3[H])=C([H])C([H])=C([H])C=2[H])C(Cl)=C([H])C=1[H]	Active
ClC1C([H])=C([H])C(N=C(N([H])C2C(OC3C(Cl)=C([H])C([H])=C(Cl)C=3[H])=C([H])C([H])=C([H])C=2[H])N([H])C([H])([H])C([H])([H])C([H])([H])N([H])C2C3C(=C([H])C(=C([H])C=3[H])Cl)N=C([H])C=2[H])=C([H])C=1[H]	Active
ClC1C([H])=C(N=C(N([H])C2C(OC3C(Cl)=C([H])C([H])=C(Cl)C=3[H])=C([H])C([H])=C([H])C=2[H])N([H])C([H])([H])C([H])([H])C([H])([H])N([H])C2C3C(=C([H])C(=C([H])C=3[H])Cl)N=C([H])C=2[H])C([H])=C([H])C=1[H]	Active
C([H])([H])([H])OC1C([H])=C([H])C(OC2C([H])=C([H])C(N([H])C(N([H])C([H])([H])C([H])([H])N([H])C3C4C(=C([H])C(=C([H])C=4[H])Cl)N=C([H])C=3[H])=NC3C([H])=C(Cl)C([H])=C([H])C=3[H])=C([H])C=2[H])=C([H])C=1[H]	Active
ClC1C([H])=C2C3C(N(C2=C([H])C=1[H])C([H])([H])C([H])([H])N1C([H])([H])C([H])([H])C([H])([H])C1([H])[H])=C([H])C1C(=C([H])C(=C([H])C=1N([H])C([H])([H])C([H])([H])C([H])([H])N1C([H])([H])C([H])([H])OC([H])([H])C1([H])[H])Cl)N=3	Active
ClC1C([H])=C2C(C(=C([H])C([H])=N2)N([H])C2C([H])=C([H])C(N([H])C3N=C(N4C([H])([H])C5C(=C([H])C([H])=C([H])C=5[H])C([H])([H])C4([H])[H])N=C(N([H])C([H])([H])C([H])([H])N4C([H])([H])C([H])([H])OC([H])([H])C4([H])[H])N=3)=C([H])C=2[H])=C([H])C=1[H]	Active
C([H])([H])([H])OC1C([H])=C(OC([H])([H])[H])C(C(C([H])=C([H])C2C([H])=C(OC([H])([H])[H])C(OC([H])([H])C3N=NN(C4C([H])=C(Cl)C(F)=C([H])C=4[H])C=3[H])=C([H])C=2[H])=O)=C(O[H])C=1[H]	Active
C([H])([H])([H])OC1C([H])=C(OC([H])([H])[H])C(C(C([H])=C([H])C2C([H])=C(OC([H])([H])C3N=NN(C4C([H])=C(Cl)C(F)=C([H])C=4[H])C=3[H])C(OC([H])([H])[H])=C([H])C=2[H])=O)=C(O[H])C=1[H]	Active
C([H])([H])([H])OC1C([H])=C(OC([H])([H])[H])C(C(C([H])=C([H])C2C([H])=C(OC([H])([H])C3N=NN(C4C(Cl)=C([H])C([H])=C([H])C=4[H])C=3[H])C(OC([H])([H])[H])=C([H])C=2[H])=O)=C(O[H])C=1[H]	Active
C([H])([H])([H])OC1C([H])=C(OC([H])([H])[H])C(C(C([H])=C([H])C2C([H])=C(OC([H])([H])C3N=NN(C4C(Cl)=C([H])C([H])=C([H])C=4[H])C=3[H])C(OC([H])([H])C3N=NN(C4C(Cl)=C([H])C([H])=C([H])C=4[H])C=3[H])=C([H])C=2[H])=O)=C(O[H])C=1[H]	Active
C([H])([H])([H])N1C(C([H])([H])N([H])C([H])([H])C([H])([H])N([H])C2C3C(=C([H])C(=C([H])C=3[H])Cl)N=C([H])C=2[H])=C([H])C(=O)C(OC([H])([H])C2C([H])=C([H])C([H])=C([H])C=2[H])=C1[H]	Active
ClC1C([H])=C([H])C(N=C(N([H])C2C([H])=C([H])C(OC3C(Cl)=C([H])C([H])=C(Cl)C=3[H])=C([H])C=2[H])N([H])C([H])([H])C([H])([H])N([H])C2C3C(=C([H])C(=C([H])C=3[H])Cl)N=C([H])C=2[H])=C([H])C=1[H]	Active
C([H])([H])([H])C([H])([H])N1C([H])([H])C([H])([H])N(C2N=C(N3C4C(=C([H])C([H])=C([H])C=4[H])C([H])([H])C([H])([H])C3([H])[H])N=C(N([H])C3C([H])=C([H])C(N([H])C4C5C(=C([H])C(=C([H])C=5[H])Cl)N=C([H])C=4[H])=C([H])C=3[H])N=2)C([H])([H])C1([H])[H]	Active
C([H])([H])([H])OC1C([H])=C(OC([H])([H])[H])C(C(C([H])=C([H])C2C([H])=C(OC([H])([H])[H])C(OC([H])([H])C3N=NN(C4C([H])=C([H])C(Cl)=C([H])C=4[H])C=3[H])=C([H])C=2[H])=O)=C(O[H])C=1[H]	Active
C([H])([H])([H])OC1C([H])=C(OC([H])([H])[H])C(C(C([H])=C([H])C2C([H])=C(OC([H])([H])C3N=NN(C4C([H])=C([H])C(Cl)=C([H])C=4[H])C=3[H])C(OC([H])([H])[H])=C([H])C=2[H])=O)=C(O[H])C=1[H]	Active
C([H])([H])([H])C1=NC2N(N=C(C(F)(F)F)N=2)C(N([H])C2C([H])=C(F)C(C(F)(F)F)=C(F)C=2[H])=C1[H]	Active
C([H])([H])([H])C([H])([H])C([H])([H])N(C(C1C([H])=C(C2C([H])=C([H])C([H])=C([H])C=2[H])C([H])=C(C(N([H])C([H])(C([H])(C([H])([H])N([H])C(C2C([H])=C(OC([H])([H])[H])C([H])=C([H])C=2[H])(C([H])([H])[H])C([H])([H])[H])O[H])C([H])([H])C2C([H])=C([H])C([H])=C([H])C=2[H])=O)C=1[H])=O)C([H])([H])C([H])([H])C([H])([H])[H]	Active
C([H])([H])([H])C1=NC2N(N=C(C(F)(F)C([H])([H])[H])N=2)C(N([H])C2C([H])=C(F)C(C(F)(F)F)=C([H])C=2[H])=C1[H]	Active
O([H])N([H])C(C([H])([H])C([H])([H])C([H])([H])C([H])([H])C([H])([H])C([H])(C(N([H])C1C2C(=C([H])C([H])=C([H])N=2)C([H])=C([H])C=1[H])=O)N([H])C(C1N([H])C2C(=C([H])C([H])=C([H])C=2[H])C=1[H])=O)=O	Active
ClC1C([H])=C(OC2C([H])=C([H])C(N([H])C(N([H])C([H])([H])C([H])([H])N([H])C3C4C(=C([H])C(=C([H])C=4[H])Cl)N=C([H])C=3[H])=NC3C([H])=C([H])C([H])=C([H])C=3[H])=C([H])C=2[H])C(Cl)=C([H])C=1[H]	Active
ClC1C([H])=C(OC2C(N([H])C(N([H])C([H])([H])C([H])([H])N([H])C3C4C(=C([H])C(=C([H])C=4[H])Cl)N=C([H])C=3[H])=NC3C([H])=C([H])C([H])=C([H])C=3[H])=C([H])C([H])=C([H])C=2[H])C(Cl)=C([H])C=1[H]	Active
ClC1C([H])=C(N=C(N([H])C2C([H])=C([H])C(OC3C(Cl)=C([H])C([H])=C(Cl)C=3[H])=C([H])C=2[H])N([H])C([H])([H])C([H])([H])N([H])C2C3C(=C([H])C(=C([H])C=3[H])Cl)N=C([H])C=2[H])C([H])=C([H])C=1[H]	Active
ClC1C([H])=C(N=C(N([H])C2C(OC3C(Cl)=C([H])C([H])=C(Cl)C=3[H])=C([H])C([H])=C([H])C=2[H])N([H])C([H])([H])C([H])([H])N([H])C2C3C(=C([H])C(=C([H])C=3[H])Cl)N=C([H])C=2[H])C([H])=C([H])C=1[H]	Active
ClC1C([H])=C2C(C([H])=C3N(C([H])([H])C([H])([H])N4C([H])([H])C([H])([H])C([H])([H])C4([H])[H])C4C(=C([H])C([H])=C([H])C=4[H])C3=N2)=C(N([H])C([H])([H])C([H])([H])C([H])([H])N2C([H])([H])C([H])([H])OC([H])([H])C2([H])[H])C=1[H]	Active
O([H])C([H])(C1C2C(=C(C(F)(F)F)C([H])=C([H])C=2[H])N=C(C(F)(F)F)C=1[H])C1([H])N([H])C([H])([H])C([H])([H])C([H])([H])C1([H])[H]	Active
C([H])([H])([H])N(C([H])([H])C1N(C2([H])C([H])([H])C2([H])[H])C([H])=C(O[H])C(=O)C=1[H])C([H])([H])C([H])([H])C([H])([H])N([H])C1C2C(=C([H])C(=C([H])C=2[H])Cl)N=C([H])C=1[H]	Active
C([H])([H])([H])C(OC(N([H])C1([H])C([H])([H])C([H])([H])N(C2([H])C([H])([H])C([H])([H])C3(OOC4(C5([H])C([H])([H])C6([H])C([H])([H])C([H])(C([H])([H])C4([H])C6([H])[H])C5([H])[H])OO3)C([H])([H])C2([H])[H])C([H])([H])C1([H])[H])=O)(C([H])([H])[H])C([H])([H])[H]	Active
C([H])([H])([H])C([H])([H])C([H])(C([H])(C(OC([H])(C(N([H])C([H])(C(N([H])C([H])(C([H])=C([H])C(N1C(=O)C([H])=C(OC([H])([H])[H])C1([H])C([H])([H])[H])=O)C([H])([H])[H])=O)C([H])([H])C([H])(C([H])([H])[H])C([H])([H])[H])=O)C([H])([H])C([H])(C([H])([H])[H])C([H])([H])[H])=O)N(C([H])([H])[H])C([H])([H])[H])C([H])([H])[H]	Active
C([H])([H])([H])C([H])([H])N(C([H])([H])C([H])([H])C([H])([H])N([H])C1C2C(=NC3=C(C=2[H])N(C([H])([H])C([H])([H])N2C([H])([H])C([H])([H])C([H])([H])C2([H])[H])C2C3=C([H])C(=C([H])C=2[H])Cl)C([H])=C(Cl)C=1[H])C([H])([H])C([H])([H])[H]	Active
ClC1C([H])=C2C(C([H])=C3N(C([H])([H])C([H])([H])N4C([H])([H])C([H])([H])C([H])([H])C4([H])[H])C4C(=C([H])C([H])=C([H])C=4[H])C3=N2)=C(N([H])C([H])([H])C([H])([H])C([H])([H])N2C([H])([H])C([H])([H])C([H])([H])C([H])([H])C2([H])[H])C=1[H]	Active
C([H])([H])([H])C1([H])C([H])([H])C(C([H])=C([H])[H])(C([H])([H])[H])C([H])(C2C(=O)N(O[H])C([H])=C([H])C=2O[H])C([H])(C([H])([H])[H])C1([H])[H]	Active
FC1(C([H])([H])C([H])([H])N(C2([H])C([H])([H])C([H])([H])C3(OOC4(C5([H])C([H])([H])C6([H])C([H])([H])C([H])(C([H])([H])C4([H])C6([H])[H])C5([H])[H])OO3)C([H])([H])C2([H])[H])C([H])([H])C1([H])[H])F	Active
C([H])([H])([H])C1([H])N([H])C2(C3C(=C([H])C([H])=C(C=3[H])Cl)N([H])C2=O)C2N([H])C3C(C=2C1([H])[H])=C([H])C(F)=C(Cl)C=3[H]	Active
C([H])([H])([H])C([H])([H])C([H])([H])C([H])([H])N(C([H])([H])C([H])(C1C2=C(C(C3C2=C([H])C([H])=C(Cl)C=3[H])=C([H])C2C([H])=C([H])C(Cl)=C([H])C=2[H])C([H])=C(Cl)C=1[H])O[H])C([H])([H])C([H])([H])C([H])([H])C([H])([H])[H]	Active
C([H])([H])([H])N1C([H])([H])C([H])([H])N(C(C([H])(N([H])C2C3C(=C([H])C(=C([H])C=3[H])Cl)N=C([H])C=2[H])C([H])([H])C2C3C(=C([H])C([H])=C([H])C=3[H])N([H])C=2[H])=O)C([H])([H])C1([H])[H]	Active
FC1C([H])=C2C(N([H])C3C2=NC([H])=NC=3N([H])C([H])([H])C([H])([H])C([H])([H])N2C([H])([H])C([H])([H])OC([H])([H])C2([H])[H])=C([H])C=1[H]	Active
C([H])([H])([H])C([H])([H])N(C([H])([H])C([H])([H])N([H])C1C2C(=NC3=C(C=2[H])N(C([H])([H])C([H])([H])N(C([H])([H])C([H])([H])[H])C([H])([H])C([H])([H])[H])C2C3=C([H])C(=C([H])C=2[H])Cl)C([H])=C(Cl)C=1[H])C([H])([H])C([H])([H])[H]	Active
C([H])([H])([H])C([H])([H])N(C([H])([H])C([H])([H])N([H])C1C2C(=NC3=C(C=2[H])N(C([H])([H])C([H])([H])N2C([H])([H])C([H])([H])C([H])([H])C2([H])[H])C2C3=C([H])C([H])=C([H])C=2[H])C([H])=C(Cl)C=1[H])C([H])([H])C([H])([H])[H]	Active
ClC1C([H])=C2C3C(N(C2=C([H])C=1[H])C([H])([H])C([H])([H])N1C([H])([H])C([H])([H])C([H])([H])C1([H])[H])=C([H])C1C(=C([H])C(=C([H])C=1N([H])C([H])([H])C([H])([H])C([H])([H])N1C([H])([H])C([H])([H])C([H])([H])C([H])([H])C1([H])[H])Cl)N=3	Active
O([H])C1C(=O)C([H])=C(C([H])([H])N([H])C([H])([H])C([H])([H])C([H])([H])C([H])([H])C([H])([H])C([H])([H])N([H])C2C3C(=C([H])C(=C([H])C=3[H])Cl)N=C([H])C=2[H])N(C2([H])C([H])([H])C2([H])[H])C=1[H]	Active
C([H])([H])([H])OC1N=C2C(N=C3C(=C2N([H])C2C([H])=C(C([H])([H])N4C([H])([H])C([H])([H])C([H])([H])C4([H])[H])C(O[H])=C(C([H])([H])N4C([H])([H])C([H])([H])C([H])([H])C4([H])[H])C=2[H])C([H])=C([H])C(Cl)=C3[H])=C([H])C=1[H]	Active
C([H])([H])([H])N1C([H])([H])C([H])([H])N(C(C([H])([H])C([H])([H])C([H])(N([H])C2C3C(=C([H])C(=C([H])C=3[H])Cl)N=C([H])C=2[H])C([H])([H])C2C([H])=C([H])C([H])=C([H])C=2[H])=O)C([H])([H])C1([H])[H]	Active
C([H])([H])([H])OC1C([H])=C(N([H])C2N=C(N([H])C3C([H])=C([H])C(N([H])C4C5C(=C([H])C(=C([H])C=5[H])Cl)N=C([H])C=4[H])=C([H])C=3[H])N=C(N([H])C([H])([H])C([H])([H])C([H])([H])N3C([H])([H])C([H])([H])OC([H])([H])C3([H])[H])N=2)C([H])=C([H])C=1[H]	Active
C([H])([H])([H])C1=NC2N(N=C(C(F)(F)C([H])([H])[H])N=2)C(N([H])C2C([H])=C([H])C(C(F)(F)F)=C([H])C=2[H])=C1[H]	Active
O([H])C1C(=O)C([H])=C(C([H])([H])N([H])C([H])([H])C([H])([H])C([H])([H])C([H])([H])N([H])C2C3C(=C([H])C(=C([H])C=3[H])Cl)N=C([H])C=2[H])N(C2([H])C([H])([H])C2([H])[H])C=1[H]	Active
C([H])([H])([H])N1C([H])([H])C([H])([H])C([H])(N([H])C2=NN3C(=NC([H])=C3C3C([H])=C([H])C(N([H])C4N=C([H])C(C(F)(F)F)=C([H])C=4[H])=C([H])C=3[H])C([H])=C2[H])C([H])([H])C1([H])[H]	Active
O([H])C1C(=O)C([H])=C(C([H])([H])N([H])C([H])([H])C([H])([H])C([H])([H])N([H])C2C3C(=C([H])C(=C([H])C=3[H])Cl)N=C([H])C=2[H])N(C2([H])C([H])([H])C2([H])[H])C=1[H]	Active
C([H])([H])([H])C1=C([H])C([H])=C(C(C([H])=C([H])C2C([H])=C([H])C(C(N([H])C([H])([H])C([H])([H])OC([H])([H])C([H])([H])OC([H])([H])C([H])([H])N([H])C3C4C(=C([H])C(=C([H])C=4[H])Cl)N=C([H])C=3[H])=O)=C([H])C=2[H])=O)O1	Active
C([H])([H])([H])N1C([H])([H])C([H])([H])C([H])(N([H])C2([H])C([H])([H])C([H])([H])C3(OOC4(C5([H])C([H])([H])C6([H])C([H])([H])C([H])(C([H])([H])C4([H])C6([H])[H])C5([H])[H])OO3)C([H])([H])C2([H])[H])C([H])([H])C1([H])[H]	Active
O=C(N([H])C([H])([H])C([H])([H])C([H])([H])N1C([H])([H])C([H])([H])N(C([H])([H])C([H])([H])C([H])([H])N([H])C(C([H])([H])C2([H])C([H])([H])C([H])([H])C3(OOC4(C5([H])C([H])([H])C6([H])C([H])([H])C([H])(C([H])([H])C4([H])C6([H])[H])C5([H])[H])OO3)C([H])([H])C2([H])[H])=O)C([H])([H])C1([H])[H])C([H])([H])C1([H])C([H])([H])C([H])([H])C2(OOC3(C4([H])C([H])([H])C5([H])C([H])([H])C([H])(C([H])([H])C3([H…	Active
O=C1N([H])C([H])([H])C([H])([H])N(C2([H])C([H])([H])C([H])([H])C3(OOC4(C5([H])C([H])([H])C6([H])C([H])([H])C([H])(C([H])([H])C4([H])C6([H])[H])C5([H])[H])OO3)C([H])([H])C2([H])[H])C1([H])[H]	Active
C([H])([H])([H])N1C([H])([H])C([H])([H])N(C(C([H])([H])C([H])(N([H])C2C3C(=C([H])C(=C([H])C=3[H])Cl)N=C([H])C=2[H])C([H])([H])C2C([H])=C([H])C([H])=C([H])C=2[H])=O)C([H])([H])C1([H])[H]	Active
ClC1C([H])=C2C3C(N(C2=C([H])C=1[H])C([H])([H])C([H])([H])N1C([H])([H])C([H])([H])C([H])([H])C1([H])[H])=C([H])C1C(=C([H])C(=C([H])C=1N([H])C([H])([H])C([H])([H])N1C([H])([H])C([H])([H])C([H])([H])C1([H])[H])Cl)N=3	Active
ClC1C([H])=C2C(C([H])=C3N(C([H])([H])C([H])([H])N4C([H])([H])C([H])([H])C([H])([H])C4([H])[H])C4C(=C([H])C([H])=C([H])C=4[H])C3=N2)=C(N([H])C([H])([H])C([H])([H])N2C([H])([H])C([H])([H])C([H])([H])C2([H])[H])C=1[H]	Active
C([H])([H])([H])N1C([H])([H])C([H])([H])N(C2N=C(N3C([H])([H])C4C(=C([H])C([H])=C([H])C=4[H])C([H])([H])C3([H])[H])N=C(N([H])C3C([H])=C([H])C(N([H])C4C5C(=C([H])C(=C([H])C=5[H])Cl)N=C([H])C=4[H])=C([H])C=3[H])N=2)C([H])([H])C1([H])[H]	Active
C([H])([H])([H])N1C([H])([H])C([H])([H])C([H])(N([H])C2=NN3C(=NC([H])=C3C3C([H])=C([H])C(N([H])C4N=C(C(F)(F)F)C([H])=C([H])C=4[H])=C([H])C=3[H])C([H])=C2[H])C([H])([H])C1([H])[H]	Active
C([H])([H])([H])N(C([H])([H])C([H])([H])C([H])([H])N([H])C1C2C(=C([H])C(=C([H])C=2[H])Cl)N=C([H])C=1[H])C([H])([H])C([H])([H])C([H])([H])N([H])C(C1C([H])=C([H])C(C([H])=C([H])C(C2=C([H])C([H])=C(C([H])([H])[H])O2)=O)=C([H])C=1[H])=O	Active
O([H])C1C(=O)C([H])=C(C([H])([H])N([H])C([H])([H])C([H])([H])N([H])C2C3C(=C([H])C(=C([H])C=3[H])Cl)N=C([H])C=2[H])N(C2([H])C([H])([H])C2([H])[H])C=1[H]	Active
C([H])([H])([H])C(C(OC([H])([H])OP(OC([H])([H])OC(C(C([H])([H])[H])(C([H])([H])[H])C([H])([H])[H])=O)(C([H])([H])C([H])([H])C([H])([H])N(C([H])=O)O[H])=O)=O)(C([H])([H])[H])C([H])([H])[H]	Active
C1([H])([H])C([H])([H])C([H])([H])N(C2([H])C([H])([H])C([H])([H])C3(OOC4(C5([H])C([H])([H])C6([H])C([H])([H])C([H])(C([H])([H])C4([H])C6([H])[H])C5([H])[H])OO3)C([H])([H])C2([H])[H])C([H])([H])C1([H])[H]	Active
C([H])([H])([H])C([H])([H])C([H])([H])C([H])([H])N(C([H])([H])C([H])([H])C([H])(C1C2C(=C([H])C(C(F)(F)F)=C([H])C=2[H])C2C(=C(C([H])=C(C=2[H])Cl)Cl)C=1[H])O[H])C([H])([H])C([H])([H])C([H])([H])C([H])([H])[H]	Active
C([H])([H])([H])C([H])([H])C([H])(C([H])(N([H])C1C2C(=C([H])C(=C([H])C=2[H])Cl)N=C([H])C=1[H])C([H])([H])C(N1C([H])([H])C([H])([H])N(C([H])([H])[H])C([H])([H])C1([H])[H])=O)C([H])([H])[H]	Active
C([H])([H])([H])OC(C(C([H])([H])[H])=C([H])C1C([H])=C([H])C(OC2C([H])=C([H])C(N([H])C(N([H])C([H])([H])C([H])([H])C([H])([H])C([H])([H])N([H])C3C4C(=C([H])C(=C([H])C=4[H])Cl)N=C([H])C=3[H])=NC3C([H])=C([H])C(Cl)=C([H])C=3[H])=C([H])C=2[H])=C([H])C=1[H])=O	Active
C([H])([H])([H])N1C([H])([H])C([H])([H])N(C(C([H])(N([H])C2C3C(=C([H])C(=C([H])C=3[H])Cl)N=C([H])C=2[H])C([H])([H])C2C([H])=C([H])C([H])=C([H])C=2[H])=O)C([H])([H])C1([H])[H]	Active
C([H])([H])([H])C([H])(C(N([H])C([H])([H])C([H])([H])C([H])([H])N(C([H])([H])[H])C([H])([H])[H])=O)N([H])C1C2C(=C([H])C(=C([H])C=2[H])Cl)N=C([H])C=1[H]	Active
ClC1C([H])=C2C(C(=C([H])C([H])=N2)N([H])C2C([H])=C([H])C(N([H])C3N=C(N4C([H])([H])C([H])([H])OC([H])([H])C4([H])[H])N=C(N([H])C([H])([H])C([H])([H])C([H])([H])N4C([H])([H])C([H])([H])OC([H])([H])C4([H])[H])N=3)=C([H])C=2[H])=C([H])C=1[H]	Active
C([H])([H])([H])OC1C([H])=C([H])C(N([H])C2N=C(N([H])C3C([H])=C([H])C(N([H])C4C5C(=C([H])C(=C([H])C=5[H])Cl)N=C([H])C=4[H])=C([H])C=3[H])N=C(N([H])C([H])([H])C([H])([H])C([H])([H])N3C([H])([H])C([H])([H])OC([H])([H])C3([H])[H])N=2)=C([H])C=1[H]	Active
C([H])([H])([H])C1=NC2N(N=C(C(F)(F)F)N=2)C(N([H])C2C([H])=C([H])C(C(F)(F)F)=C([H])C=2[H])=C1[H]	Active
C([H])([H])([H])C([H])(OC(OC([H])([H])OP(C([H])(C1C([H])=C(F)C(F)=C([H])C=1[H])OC([H])([H])C(N(O[H])C([H])([H])[H])=O)(OC([H])([H])OC(OC([H])(C([H])([H])[H])C([H])([H])[H])=O)=O)=O)C([H])([H])[H]	Active
C([H])([H])([H])N1C(C([H])([H])N([H])C([H])([H])C([H])([H])C([H])([H])C([H])([H])N([H])C2C3C(=C([H])C(=C([H])C=3[H])Cl)N=C([H])C=2[H])=C([H])C(=O)C(O[H])=C1[H]	Active
C([H])([H])([H])N1C(C([H])([H])N([H])C([H])([H])C([H])([H])C([H])([H])N([H])C2C3C(=C([H])C(=C([H])C=3[H])Cl)N=C([H])C=2[H])=C([H])C(=O)C(O[H])=C1[H]	Active
FC1(C([H])([H])C([H])([H])C([H])(N([H])C2([H])C([H])([H])C([H])([H])C3(OOC4(C5([H])C([H])([H])C6([H])C([H])([H])C([H])(C([H])([H])C4([H])C6([H])[H])C5([H])[H])OO3)C([H])([H])C2([H])[H])C([H])([H])C1([H])[H])F	Active
C1([H])([H])C([H])([H])N(C2([H])C([H])([H])C([H])([H])C3(OOC4(C5([H])C([H])([H])C6([H])C([H])([H])C([H])(C([H])([H])C4([H])C6([H])[H])C5([H])[H])OO3)C([H])([H])C2([H])[H])C([H])([H])C1([H])[H]	Active
C([H])([H])([H])OC1=C2C(C([H])=C(C3C([H])=C4C(OC([H])([H])O4)=C([H])C=3[H])O2)=C([H])C(C([H])([H])C([H])([H])C([H])([H])OC(C([H])([H])C([H])([H])C(OC2([H])C([H])(C([H])([H])[H])C3([H])C45OOC(C([H])([H])[H])(OC4([H])O2)C([H])([H])C([H])([H])C5([H])C([H])(C([H])([H])C3([H])[H])C([H])([H])[H])=O)=O)=C1[H]	Active
C([H])([H])([H])C([H])(C([H])([H])C([H])(C(N([H])C([H])(C1([H])OC2(C3([H])C([H])([H])C4([H])C([H])([H])C([H])(C([H])([H])C2([H])C4([H])[H])C3([H])[H])OO1)C([H])([H])C([H])([H])C1C([H])=C([H])C([H])=C([H])C=1[H])=O)N([H])C(N1C([H])([H])C([H])([H])OC([H])([H])C1([H])[H])=O)C([H])([H])[H]	Active
C([H])([H])([H])OC(C(C([H])([H])[H])=C([H])C1C([H])=C([H])C(OC2C([H])=C([H])C(N([H])C(N([H])C([H])([H])C([H])([H])C([H])([H])N([H])C3C4C(=C([H])C(=C([H])C=4[H])Cl)N=C([H])C=3[H])=NC3C([H])=C([H])C(Cl)=C([H])C=3[H])=C([H])C=2[H])=C([H])C=1[H])=O	Active
C([H])([H])([H])OC(C(C([H])([H])[H])=C([H])C1C([H])=C([H])C(OC2C([H])=C([H])C(N([H])C(N([H])C([H])([H])C([H])([H])N([H])C3C4C(=C([H])C(=C([H])C=4[H])Cl)N=C([H])C=3[H])=NC3C([H])=C([H])C(Cl)=C([H])C=3[H])=C([H])C=2[H])=C([H])C=1[H])=O	Active
C([H])([H])([H])C([H])(C([H])([H])C([H])(C(N1C([H])([H])C([H])([H])N(C([H])([H])[H])C([H])([H])C1([H])[H])=O)N([H])C1C2C(=C([H])C(=C([H])C=2[H])Cl)N=C([H])C=1[H])C([H])([H])[H]	Active
C([H])([H])([H])C([H])([H])C([H])(C([H])(C(N1C([H])([H])C([H])([H])N(C([H])([H])[H])C([H])([H])C1([H])[H])=O)N([H])C1C2C(=C([H])C(=C([H])C=2[H])Cl)N=C([H])C=1[H])C([H])([H])[H]	Active
C([H])([H])([H])N1C([H])([H])C([H])([H])N(C(C([H])([H])C([H])([H])C([H])(C(N2C([H])([H])C([H])([H])N(C([H])([H])[H])C([H])([H])C2([H])[H])=O)N([H])C2C3C(=C([H])C(=C([H])C=3[H])Cl)N=C([H])C=2[H])=O)C([H])([H])C1([H])[H]	Active
C([H])([H])([H])N1C([H])([H])C([H])([H])N(C(C([H])(N([H])C2C3C(=C([H])C(=C([H])C=3[H])Cl)N=C([H])C=2[H])C([H])([H])O[H])=O)C([H])([H])C1([H])[H]	Active
N([H])([H])C1C([H])=C(C(N([H])C([H])(C2C([H])=C([H])C(N3N=C([H])C([H])=C3[H])=C([H])C=2[H])C(N([H])O[H])=O)=O)C([H])=C([H])C=1[H]	Active
C([H])([H])([H])C([H])([H])N1C([H])([H])C([H])([H])N(C2N=C(N([H])C3C([H])=C(OC([H])([H])[H])C([H])=C([H])C=3[H])N=C(N([H])C3C([H])=C([H])C(N([H])C4C5C(=C([H])C(=C([H])C=5[H])Cl)N=C([H])C=4[H])=C([H])C=3[H])N=2)C([H])([H])C1([H])[H]	Active
C([H])([H])([H])C([H])([H])N([H])C(ON(C(C([H])([H])OC([H])(P(OC([H])([H])OC(OC(C([H])([H])[H])(C([H])([H])[H])C([H])([H])[H])=O)(OC([H])([H])OC(OC(C([H])([H])[H])(C([H])([H])[H])C([H])([H])[H])=O)=O)C1C([H])=C(F)C(F)=C([H])C=1[H])=O)C([H])([H])[H])=O	Active
C([H])([H])([H])C([H])([H])C(C([H])([H])C([H])([H])C([H])([H])C([H])([H])C([H])([H])C([H])(C1N([H])C(C2C([H])=C3C(C([H])=C([H])C([H])=C3[H])=C([H])C=2[H])=C([H])N=1)N([H])C(C12C([H])([H])C([H])([H])N(C([H])([H])C1([H])[H])C([H])([H])C2([H])[H])=O)=O	Active
C([H])([H])([H])C1=NC2N(N=C([H])N=2)C(N([H])C2C([H])=C([H])C(C(F)(F)F)=C([H])C=2[H])=C1[H]	Active
C1([H])([H])OC([H])([H])C([H])([H])N(C2([H])C([H])([H])C([H])([H])C3(OOC4(C5([H])C([H])([H])C6([H])C([H])([H])C([H])(C([H])([H])C4([H])C6([H])[H])C5([H])[H])OO3)C([H])([H])C2([H])[H])C1([H])[H]	Active
C([H])([H])([H])OC1C([H])=C(OC([H])([H])[H])C(C(C([H])=C([H])C2C([H])=C([H])C(C(OC3([H])C([H])(C([H])([H])[H])C4([H])C56OOC(C([H])([H])[H])(OC5([H])O3)C([H])([H])C([H])([H])C6([H])C([H])(C([H])([H])C4([H])[H])C([H])([H])[H])=O)=C([H])C=2[H])=O)=C([H])C=1[H]	Active
C([H])([H])([H])C1N(C([H])([H])C([H])([H])C([H])([H])C([H])([H])C([H])([H])C([H])([H])N([H])C2C3C(=C([H])C(=C([H])C=3[H])Cl)N=C([H])C=2[H])C([H])=C([H])C(=O)C=1O[H]	Active
C([H])([H])([H])C([H])([H])N(C([H])([H])C([H])([H])N([H])C(C([H])(N([H])C1C2C(=C([H])C(=C([H])C=2[H])Cl)N=C([H])C=1[H])C([H])([H])[H])=O)C([H])([H])C([H])([H])[H]	Active
O=C(N([H])C([H])([H])C([H])([H])C([H])([H])N1C([H])([H])C([H])([H])N(C([H])([H])C([H])([H])C([H])([H])N([H])C(C([H])([H])C2([H])C([H])([H])C([H])([H])C3(OOC4(C([H])([H])C([H])([H])C([H])([H])C([H])([H])C4([H])[H])OO3)C([H])([H])C2([H])[H])=O)C([H])([H])C1([H])[H])C([H])([H])C1([H])C([H])([H])C([H])([H])C2(OOC3(C([H])([H])C([H])([H])C([H])([H])C([H])([H])C3([H])[H])OO2)C([H])([H])C1([H])[H]	Active
C([H])([H])([H])OC(C(C([H])([H])[H])=C([H])C1C([H])=C([H])C(OC2C([H])=C([H])C(N([H])C(N([H])C([H])([H])C([H])([H])C([H])([H])C([H])([H])N([H])C3C4C(=C([H])C(=C([H])C=4[H])Cl)N=C([H])C=3[H])=NC3C([H])=C(Cl)C([H])=C([H])C=3[H])=C([H])C=2[H])=C([H])C=1[H])=O	Active
C([H])([H])([H])N1C([H])([H])C([H])([H])N(C(C([H])([H])C([H])([H])C([H])([H])N([H])C2C3C(=C([H])C(=C([H])C=3[H])Cl)N=C([H])C=2[H])=O)C([H])([H])C1([H])[H]	Active
C([H])([H])([H])OC(C(C([H])([H])[H])=C([H])C1C([H])=C([H])C(OC2C([H])=C([H])C(N([H])C(N([H])C([H])([H])C([H])([H])N([H])C3C4C(=C([H])C(=C([H])C=4[H])Cl)N=C([H])C=3[H])=NC3C([H])=C([H])C([H])=C([H])C=3[H])=C([H])C=2[H])=C([H])C=1[H])=O	Active
C([H])([H])([H])OC(C(C([H])([H])[H])=C([H])C1C([H])=C([H])C(OC2C([H])=C([H])C(N([H])C(N([H])C([H])([H])C([H])([H])C([H])([H])N([H])C3C4C(=C([H])C(=C([H])C=4[H])Cl)N=C([H])C=3[H])=NC3C([H])=C([H])C([H])=C([H])C=3[H])=C([H])C=2[H])=C([H])C=1[H])=O	Active
C([H])([H])([H])C([H])(C([H])(C(N1C([H])([H])C([H])([H])N(C([H])([H])[H])C([H])([H])C1([H])[H])=O)N([H])C1C2C(=C([H])C(=C([H])C=2[H])Cl)N=C([H])C=1[H])C([H])([H])[H]	Active
C([H])([H])([H])OC1C([H])=C(N([H])C2N=C(N3C([H])([H])C([H])([H])N(C([H])([H])[H])C([H])([H])C3([H])[H])N=C(N([H])C3C([H])=C([H])C(N([H])C4C5C(=C([H])C(=C([H])C=5[H])Cl)N=C([H])C=4[H])=C([H])C=3[H])N=2)C([H])=C([H])C=1[H]	Active
C([H])([H])([H])C([H])(N([H])C(C1C([H])=C([H])C(C([H])=C([H])C(C2=C([H])C([H])=C(C([H])([H])[H])O2)=O)=C([H])C=1[H])=O)C([H])([H])N([H])C1C2C(=C([H])C(=C([H])C=2[H])Cl)N=C([H])C=1[H]	Active
C([H])([H])([H])N1C([H])([H])C([H])([H])C([H])(N([H])C2=NN3C(=NC([H])=C3C3C([H])=C([H])C(N([H])C4C(F)=C([H])C([H])=C(C([H])([H])[H])N=4)=C([H])C=3[H])C([H])=C2[H])C([H])([H])C1([H])[H]	Active
C([H])([H])([H])N1C([H])([H])C([H])([H])C([H])(N([H])C2=NN3C(=NC([H])=C3C3C([H])=C(F)C(N([H])C4N=C([H])C([H])=C([H])C=4[H])=C([H])C=3[H])C([H])=C2[H])C([H])([H])C1([H])[H]	Active
C([H])([H])([H])OC1C([H])=C2C(N=C([H])C([H])=C2[H])=C(N([H])C([H])(C([H])([H])C([H])([H])C([H])([H])N([H])[H])C([H])([H])[H])C=1[H]	Active
C([H])([H])([H])C([H])(C([H])([H])C([H])(C(N([H])C([H])(C([H])=C([H])S(C1C([H])=C([H])C([H])=C([H])C=1[H])(=O)=O)C([H])([H])C([H])([H])C1C([H])=C([H])C([H])=C([H])C=1[H])=O)N([H])C(C1([H])C([H])([H])C([H])([H])C2(OOC3(C4([H])C([H])([H])C5([H])C([H])([H])C([H])(C([H])([H])C3([H])C5([H])[H])C4([H])[H])OO2)C([H])([H])C1([H])[H])=O)C([H])([H])[H]	Active
C([H])([H])([H])OC(C(C([H])([H])[H])=C([H])C1C([H])=C([H])C(OC2C([H])=C([H])C(N([H])C(N([H])C([H])([H])C([H])([H])N([H])C3C4C(=C([H])C(=C([H])C=4[H])Cl)N=C([H])C=3[H])=NC3C([H])=C(Cl)C([H])=C([H])C=3[H])=C([H])C=2[H])=C([H])C=1[H])=O	Active
C([H])([H])([H])C([H])(C(N([H])C([H])([H])C([H])([H])N1C([H])([H])C([H])([H])C([H])([H])C([H])([H])C1([H])[H])=O)N([H])C1C2C(=C([H])C(=C([H])C=2[H])Cl)N=C([H])C=1[H]	Active
C([H])([H])([H])C([H])(C(N1C([H])([H])C([H])([H])N(C([H])([H])[H])C([H])([H])C1([H])[H])=O)N([H])C1C2C(=C([H])C(=C([H])C=2[H])Cl)N=C([H])C=1[H]	Active
C([H])([H])([H])C(N([H])C1N([H])C(=O)C2=C(C([H])=C(C3C([H])=C([H])C(Cl)=C([H])C=3[H])S2)N=1)(C([H])([H])[H])C([H])([H])[H]	Active
N([H])([H])C1C([H])=C([H])C(C(N([H])C([H])(C2C([H])=C([H])C(N3N=C([H])C([H])=C3[H])=C([H])C=2[H])C(N([H])O[H])=O)=O)=C([H])C=1[H]	Active
C([H])([H])([H])OC1C(OC([H])([H])[H])=C([H])C(N([H])C2N=C(N3C([H])([H])C([H])([H])N(C([H])([H])[H])C([H])([H])C3([H])[H])N=C(N([H])C3C([H])=C([H])C(N([H])C4C5C(=C([H])C(=C([H])C=5[H])Cl)N=C([H])C=4[H])=C([H])C=3[H])N=2)=C([H])C=1[H]	Active
C([H])([H])([H])N(C(C([H])([H])OC([H])(P(OC([H])([H])OC(OC(C([H])([H])[H])(C([H])([H])[H])C([H])([H])[H])=O)(OC([H])([H])OC(OC(C([H])([H])[H])(C([H])([H])[H])C([H])([H])[H])=O)=O)C1C([H])=C(F)C(F)=C([H])C=1[H])=O)O[H]	Active
C([H])([H])([H])N1C([H])([H])C([H])([H])C([H])(N([H])C2=NN3C(=NC([H])=C3C3C([H])=C([H])C(N([H])C4C(F)=C([H])C(Cl)=C([H])N=4)=C([H])C=3[H])C([H])=C2[H])C([H])([H])C1([H])[H]	Active
C([H])([H])([H])C([H])([H])OC(C1C(=O)C2C(=C([H])C(=C([H])C=2[H])C([H])([H])C2C([H])=C([H])C(OC(F)(F)F)=C([H])C=2[H])N([H])C=1[H])=O	Active
C([H])([H])([H])C([H])([H])C1C(C2C([H])=C([H])C(Cl)=C([H])C=2[H])=C(N([H])[H])N=C(N([H])[H])N=1	Active
C([H])([H])([H])C([H])([H])N(C([H])([H])C([H])([H])C([H])([H])N([H])C(C([H])(N([H])C1C2C(=C([H])C(=C([H])C=2[H])Cl)N=C([H])C=1[H])C([H])([H])[H])=O)C([H])([H])C([H])([H])[H]	Active
C([H])([H])([H])N1C([H])([H])C([H])([H])N(C(C([H])([H])N([H])C2C3C(=C([H])C(=C([H])C=3[H])Cl)N=C([H])C=2[H])=O)C([H])([H])C1([H])[H]	Active
C([H])([H])([H])C([H])([H])N(C([H])([H])C([H])([H])C([H])([H])C([H])(N([H])C1C2C(=NC3=C(C=2[H])N(C([H])([H])C([H])([H])N2C([H])([H])C([H])([H])C([H])([H])C2([H])[H])C2C3=C([H])C([H])=C([H])C=2[H])C([H])=C(Cl)C=1[H])C([H])([H])[H])C([H])([H])C([H])([H])[H]	Active
C([H])([H])([H])OC(C(C([H])([H])[H])=C([H])C1C([H])=C([H])C(OC2C(N([H])C(N([H])C([H])([H])C([H])([H])C([H])([H])C([H])([H])N([H])C3C4C(=C([H])C(=C([H])C=4[H])Cl)N=C([H])C=3[H])=NC3C([H])=C([H])C([H])=C([H])C=3[H])=C([H])C([H])=C([H])C=2[H])=C([H])C=1[H])=O	Active
FC1C([H])=C(N([H])C2N=C(N([H])C3C([H])=C([H])C(N([H])C4C5C(=C([H])C(=C([H])C=5[H])Cl)N=C([H])C=4[H])=C([H])C=3[H])N=C(N([H])C([H])([H])C([H])([H])C([H])([H])N3C([H])([H])C([H])([H])OC([H])([H])C3([H])[H])N=2)C([H])=C([H])C=1[H]	Active
ClC1C([H])=C(N([H])C2N=C(N([H])C3C([H])=C([H])C(N([H])C4C5C(=C([H])C(=C([H])C=5[H])Cl)N=C([H])C=4[H])=C([H])C=3[H])N=C(N([H])C([H])([H])C([H])([H])C([H])([H])N3C([H])([H])C([H])([H])OC([H])([H])C3([H])[H])N=2)C([H])=C([H])C=1[H]	Active
C([H])([H])([H])C1C([H])=C([H])C(C2SC3=C(N=C(N([H])C3=O)N([H])C(C([H])([H])[H])(C([H])([H])[H])C([H])([H])[H])C=2[H])=C([H])C=1[H]	Active
C([H])([H])([H])N1C([H])([H])C([H])([H])C([H])(N([H])C2=NN3C(=NC([H])=C3C3C([H])=C(F)C(N([H])C4N=C([H])C([H])=C([H])C=4[H])=C(F)C=3[H])C([H])=C2[H])C([H])([H])C1([H])[H]	Active
C1([H])([H])C([H])([H])C([H])([H])C([H])(N([H])C2([H])C([H])([H])C([H])([H])C3(OOC4(C5([H])C([H])([H])C6([H])C([H])([H])C([H])(C([H])([H])C4([H])C6([H])[H])C5([H])[H])OO3)C([H])([H])C2([H])[H])C([H])([H])C1([H])[H]	Active
C([H])([H])([H])C(N([H])C1([H])C([H])([H])C([H])([H])C2(OOC3(C4([H])C([H])([H])C5([H])C([H])([H])C([H])(C([H])([H])C3([H])C5([H])[H])C4([H])[H])OO2)C([H])([H])C1([H])[H])(C([H])([H])[H])C([H])([H])[H]	Active
O=C(N([H])C([H])([H])C1C([H])=C(C([H])([H])N([H])C(C([H])([H])C2([H])C([H])([H])C([H])([H])C3(OOC4(C5([H])C([H])([H])C6([H])C([H])([H])C([H])(C([H])([H])C4([H])C6([H])[H])C5([H])[H])OO3)C([H])([H])C2([H])[H])=O)C([H])=C([H])C=1[H])C([H])([H])C1([H])C([H])([H])C([H])([H])C2(OOC3(C4([H])C([H])([H])C5([H])C([H])([H])C([H])(C([H])([H])C3([H])C5([H])[H])C4([H])[H])OO2)C([H])([H])C1([H])[H]	Active
C([H])([H])([H])C([H])([H])OC(C1C(=O)C2C(=C([H])C(=C([H])C=2[H])OC([H])([H])C2C([H])=C([H])C(OC(F)(F)F)=C([H])C=2[H])N([H])C=1[H])=O	Active
C([H])([H])([H])OC(C(C([H])([H])[H])=C([H])C1C([H])=C([H])C(OC2C(N([H])C(N([H])C([H])([H])C([H])([H])C([H])([H])C([H])([H])N([H])C3C4C(=C([H])C(=C([H])C=4[H])Cl)N=C([H])C=3[H])=NC3C([H])=C(Cl)C([H])=C([H])C=3[H])=C([H])C([H])=C([H])C=2[H])=C([H])C=1[H])=O	Active
C([H])([H])([H])C1(OOC2(C([H])([H])C([H])([H])C([H])([H])C([H])([H])C2([H])[H])OO1)C([H])([H])C([H])([H])C(N([H])C([H])([H])C([H])([H])C([H])([H])N1C([H])([H])C([H])([H])N(C([H])([H])C([H])([H])C([H])([H])N([H])C(C([H])([H])C([H])([H])C2(OOC3(C([H])([H])C([H])([H])C([H])([H])C([H])([H])C3([H])[H])OO2)C([H])([H])[H])=O)C([H])([H])C1([H])[H])=O	Active
C([H])([H])([H])OC(C(C([H])([H])[H])=C([H])C1C([H])=C([H])C(OC2C(N([H])C(N([H])C([H])([H])C([H])([H])N([H])C3C4C(=C([H])C(=C([H])C=4[H])Cl)N=C([H])C=3[H])=NC3C([H])=C([H])C(Cl)=C([H])C=3[H])=C([H])C([H])=C([H])C=2[H])=C([H])C=1[H])=O	Active
C([H])([H])([H])OC(C(C([H])([H])[H])=C([H])C1C([H])=C([H])C(OC2C(N([H])C(N([H])C([H])([H])C([H])([H])C([H])([H])N([H])C3C4C(=C([H])C(=C([H])C=4[H])Cl)N=C([H])C=3[H])=NC3C([H])=C([H])C([H])=C([H])C=3[H])=C([H])C([H])=C([H])C=2[H])=C([H])C=1[H])=O	Active
C([H])([H])([H])C([H])(N([H])C1N([H])C(=O)C2=C(C([H])=C(C3C([H])=C([H])C(C([H])([H])[H])=C([H])C=3[H])S2)N=1)C([H])([H])[H]	Active
FC(OC1C([H])=C([H])C(C([H])([H])N2C([H])([H])C3C(C4C(N([H])C=3C2([H])[H])=C([H])C([H])=C([H])C=4[H])=O)=C([H])C=1[H])(F)F	Active
C([H])([H])([H])C([H])([H])N1C([H])([H])C([H])([H])N(C2N=C(N3C([H])([H])C([H])([H])OC([H])([H])C3([H])[H])N=C(N([H])C3C([H])=C([H])C(N([H])C4C5C(=C([H])C(=C([H])C=5[H])Cl)N=C([H])C=4[H])=C([H])C=3[H])N=2)C([H])([H])C1([H])[H]	Active
ClC1C([H])=C(N([H])C2N=C(N([H])C3C([H])=C([H])C(N([H])C4C5C(=C([H])C(=C([H])C=5[H])Cl)N=C([H])C=4[H])=C([H])C=3[H])N=C(N([H])C([H])([H])C([H])([H])N3C([H])([H])C([H])([H])OC([H])([H])C3([H])[H])N=2)C([H])=C([H])C=1[H]	Active
ClC1C(C([H])=C([H])C(C2C([H])=C([H])C(N3C([H])([H])C([H])([H])OC([H])([H])C3([H])[H])=C([H])C=2[H])=O)=C([H])C2C(=C([H])C([H])=C([H])C=2[H])N=1	Active
C1([H])([H])C([H])(N([H])C2([H])C([H])([H])C([H])([H])C3(OOC4(C5([H])C([H])([H])C6([H])C([H])([H])C([H])(C([H])([H])C4([H])C6([H])[H])C5([H])[H])OO3)C([H])([H])C2([H])[H])C1([H])[H]	Active
C([H])([H])([H])C1([H])C2([H])C34OOC(C([H])([H])C2([H])[H])(C([H])([H])[H])OC3([H])OC([H])(OC(C2C([H])=C([H])C(C([H])=C([H])C(C3=C([H])C([H])=C(C([H])([H])[H])O3)=O)=C([H])C=2[H])=O)C([H])(C4([H])C([H])([H])C1([H])[H])C([H])([H])[H]	Active
O=C(N([H])C([H])([H])C([H])([H])C([H])([H])C([H])([H])N([H])C(C([H])([H])C1([H])C([H])([H])C([H])([H])C2(OOC3(C4([H])C([H])([H])C5([H])C([H])([H])C([H])(C([H])([H])C3([H])C5([H])[H])C4([H])[H])OO2)C([H])([H])C1([H])[H])=O)C([H])([H])C1([H])C([H])([H])C([H])([H])C2(OOC3(C4([H])C([H])([H])C5([H])C([H])([H])C([H])(C([H])([H])C3([H])C5([H])[H])C4([H])[H])OO2)C([H])([H])C1([H])[H]	Active
C([H])([H])([H])C([H])([H])N(C([H])([H])C([H])([H])C([H])([H])C([H])(N([H])C1C2C(=C([H])C([H])=C(C=2[H])OC([H])([H])[H])N=C2C=1C([H])=C([H])C(=C2[H])Cl)C([H])([H])[H])C([H])([H])C([H])([H])[H]	Active
O=C(N([H])C([H])([H])C([H])([H])N([H])C(C([H])([H])C1([H])C([H])([H])C([H])([H])C2(OOC3(C4([H])C([H])([H])C5([H])C([H])([H])C([H])(C([H])([H])C3([H])C5([H])[H])C4([H])[H])OO2)C([H])([H])C1([H])[H])=O)C([H])([H])C1([H])C([H])([H])C([H])([H])C2(OOC3(C4([H])C([H])([H])C5([H])C([H])([H])C([H])(C([H])([H])C3([H])C5([H])[H])C4([H])[H])OO2)C([H])([H])C1([H])[H]	Active
O([H])C([H])(C1C2C(=C([H])C([H])=C([H])C=2[H])N=C([H])C=1[H])C1([H])N2C([H])([H])C([H])(C([H])(C([H])([H])C2([H])[H])C1([H])[H])C([H])=C([H])[H]	Active
C([H])([H])([H])OC(C(C([H])([H])[H])=C([H])C1C([H])=C([H])C(OC2C(N([H])C(N([H])C([H])([H])C([H])([H])N([H])C3C4C(=C([H])C(=C([H])C=4[H])Cl)N=C([H])C=3[H])=NC3C([H])=C(Cl)C([H])=C([H])C=3[H])=C([H])C([H])=C([H])C=2[H])=C([H])C=1[H])=O	Active
C([H])([H])([H])C([H])([H])OC(C1C(=O)C2C(=C([H])C([H])=C(C=2[H])C([H])([H])C2C([H])=C([H])C(OC(F)(F)F)=C([H])C=2[H])N([H])C=1[H])=O	Active
C([H])([H])([H])N1C([H])([H])C([H])([H])N(C2N=C(N3C([H])([H])C([H])([H])OC([H])([H])C3([H])[H])N=C(N([H])C3C([H])=C([H])C(N([H])C4C5C(=C([H])C(=C([H])C=5[H])Cl)N=C([H])C=4[H])=C([H])C=3[H])N=2)C([H])([H])C1([H])[H]	Active
ClC1C([H])=C([H])C(N([H])C2N=C(N([H])C3C([H])=C([H])C(N([H])C4C5C(=C([H])C(=C([H])C=5[H])Cl)N=C([H])C=4[H])=C([H])C=3[H])N=C(N([H])C([H])([H])C([H])([H])C([H])([H])N3C([H])([H])C([H])([H])OC([H])([H])C3([H])[H])N=2)=C([H])C=1[H]	Active
FC1C([H])=C([H])C(N([H])C2N=C(N([H])C3C([H])=C([H])C(N([H])C4C5C(=C([H])C(=C([H])C=5[H])Cl)N=C([H])C=4[H])=C([H])C=3[H])N=C(N([H])C([H])([H])C([H])([H])C([H])([H])N3C([H])([H])C([H])([H])OC([H])([H])C3([H])[H])N=2)=C([H])C=1[H]	Active
C([H])([H])([H])C1=C([H])C([H])=C(C(C([H])=C([H])C2C([H])=C([H])C(C(N([H])C([H])([H])C([H])([H])C([H])([H])C([H])([H])C([H])([H])C([H])([H])N([H])C3C4C(=C([H])C(=C([H])C=4[H])Cl)N=C([H])C=3[H])=O)=C([H])C=2[H])=O)O1	Active
C([H])([H])([H])C1=C([H])C([H])=C(C(C([H])=C([H])C2C([H])=C([H])C(C(N([H])C([H])([H])C([H])([H])C([H])([H])N([H])C3C4C(=C([H])C(=C([H])C=4[H])Cl)N=C([H])C=3[H])=O)=C([H])C=2[H])=O)O1	Active
C([H])([H])([H])C1([H])C2([H])C34OOC(C([H])([H])C2([H])[H])(C([H])([H])[H])OC3([H])OC([H])(OC(C2C([H])=C([H])C(C([H])=C([H])C(C3C([H])=C([H])C([H])=C([H])C=3[H])=O)=C([H])C=2[H])=O)C([H])(C4([H])C([H])([H])C1([H])[H])C([H])([H])[H]	Active
O=C(N([H])C([H])([H])C1C([H])=C(C([H])([H])N([H])C(C([H])([H])C2([H])C([H])([H])C([H])([H])C3(OOC4(C([H])([H])C([H])([H])C([H])([H])C([H])([H])C4([H])[H])OO3)C([H])([H])C2([H])[H])=O)C([H])=C([H])C=1[H])C([H])([H])C1([H])C([H])([H])C([H])([H])C2(OOC3(C([H])([H])C([H])([H])C([H])([H])C([H])([H])C3([H])[H])OO2)C([H])([H])C1([H])[H]	Active
C([H])([H])([H])C([H])([H])N(C([H])([H])C1C([H])=C(C2C([H])=C([H])C(Cl)=C([H])C=2[H])C(F)=C(N([H])C2C3C(=C([H])C(=C([H])C=3[H])Cl)N=C([H])C=2[H])C=1[H])C([H])([H])C([H])([H])[H]	Active
C([H])([H])([H])C(N([H])C(N([H])C([H])(C1C([H])=C([H])C(N2N=C([H])C([H])=C2[H])=C([H])C=1[H])C(N([H])O[H])=O)=O)(C([H])([H])[H])C([H])([H])[H]	Active
C([H])([H])([H])C([H])([H])OC(C1C(=O)C2C(=C([H])C([H])=C(C=2[H])OC([H])([H])C2C([H])=C([H])C(OC(F)(F)F)=C([H])C=2[H])N([H])C=1[H])=O	Active
C([H])([H])([H])C([H])([H])N1C([H])([H])C([H])([H])N(C2N=C(N([H])C3C([H])=C(Cl)C([H])=C([H])C=3[H])N=C(N([H])C3C([H])=C([H])C(N([H])C4C5C(=C([H])C(=C([H])C=5[H])Cl)N=C([H])C=4[H])=C([H])C=3[H])N=2)C([H])([H])C1([H])[H]	Active
FC1C([H])=C([H])C(N([H])C2N=C(N([H])C3C([H])=C([H])C(N([H])C4C5C(=C([H])C(=C([H])C=5[H])Cl)N=C([H])C=4[H])=C([H])C=3[H])N=C(N([H])C([H])([H])C([H])([H])N3C([H])([H])C([H])([H])OC([H])([H])C3([H])[H])N=2)=C([H])C=1[H]	Active
O([H])C1C(=O)C2C(=C([H])C([H])=C([H])C=2[H])C(=O)C=1C1([H])C([H])([H])C([H])([H])C([H])(C2C([H])=C([H])C(Cl)=C([H])C=2[H])C([H])([H])C1([H])[H]	Active
C([H])([H])([H])C([H])([H])C([H])([H])C([H])([H])OC(OC([H])([H])OP(C([H])(C1C([H])=C(F)C(F)=C([H])C=1[H])C([H])([H])C([H])([H])C(N([H])O[H])=O)(OC([H])([H])OC(OC([H])([H])C([H])([H])C([H])([H])C([H])([H])[H])=O)=O)=O	Active
C([H])([H])([H])C1=C([H])C([H])=C(C(C([H])=C([H])C2C([H])=C([H])C(C(N([H])C([H])([H])C([H])([H])C([H])([H])C([H])([H])N([H])C3C4C(=C([H])C(=C([H])C=4[H])Cl)N=C([H])C=3[H])=O)=C([H])C=2[H])=O)O1	Active
C([H])([H])([H])OC1C([H])=C2C(N=C([H])C([H])=C2C([H])(C2([H])N3C([H])([H])C([H])(C([H])(C([H])([H])C3([H])[H])C2([H])[H])C([H])=C([H])[H])O[H])=C([H])C=1[H]	Active
C([H])([H])([H])C([H])([H])OC1([H])C([H])([H])C2C(=NC3C(C=2N([H])C([H])([H])C([H])([H])C([H])([H])C([H])([H])C([H])([H])C([H])([H])C([H])([H])C([H])([H])C([H])([H])N([H])C2C4C(=C([H])C(=C([H])C=4[H])Cl)N=C4C=2C([H])([H])C([H])(OC([H])([H])C([H])([H])[H])C([H])([H])C4([H])[H])=C([H])C([H])=C(Cl)C=3[H])C([H])([H])C1([H])[H]	Active
C([H])([H])([H])C([H])([H])N([H])C([H])([H])C([H])([H])C([H])([H])C([H])(N([H])C1C2C(=C([H])C(=C([H])C=2[H])Cl)N=C([H])C=1[H])C([H])([H])[H]	Active
C([H])([H])([H])C([H])([H])N(C([H])([H])C1C(O[H])=C([H])C([H])=C(N([H])C2C([H])=C([H])N=C([H])C=2[H])C=1[H])C([H])([H])C([H])([H])[H]	Active
C([H])([H])([H])N1C([H])([H])C([H])([H])N(C2N=C(N([H])C3C([H])=C(F)C([H])=C([H])C=3[H])N=C(N([H])C3C([H])=C([H])C(N([H])C4C5C(=C([H])C(=C([H])C=5[H])Cl)N=C([H])C=4[H])=C([H])C=3[H])N=2)C([H])([H])C1([H])[H]	Active
C([H])([H])([H])OC1C(OC([H])([H])[H])=C(OC([H])([H])[H])C([H])=C(C([H])=C([H])C(C2C([H])=C([H])C(N3C([H])=NC([H])=C3[H])=C([H])C=2[H])=O)C=1[H]	Active
C([H])([H])([H])C1N=C(N([H])C2C([H])=C([H])C(C3N4C(C([H])=C([H])C(=N4)N([H])C4([H])C([H])([H])C([H])([H])C([H])(N([H])[H])C([H])([H])C4([H])[H])=NC=3[H])=C([H])C=2[H])C(F)=C([H])C=1[H]	Active
C([H])([H])([H])N(C(C([H])([H])OC([H])(P(O[H])(O[H])=O)C1C([H])=C(F)C(F)=C([H])C=1[H])=O)O[H]	Active
C([H])([H])([H])N(C(N1N=C(S(C2C([H])=C([H])C(Cl)=C([H])C=2[H])(=O)=O)N=C1[H])=O)C([H])([H])[H]	Active
C([H])([H])([H])C([H])=C1C([H])([H])N2C3([H])C4(C5C(N6C4([H])C([H])(C([H])=C(C6=O)C4([H])N6C7([H])C8(C9([H])N(C%10C(=C9C([H])(C7([H])[H])C(C6([H])[H])=C([H])C([H])([H])[H])N6C7([H])C9(C%11([H])N(C([H])([H])C(=C([H])C([H])([H])[H])C([H])(C=%107)C%11([H])[H])C([H])([H])C9([H])[H])C7C6=C([H])C([H])=C([H])C=7[H])C6C8=C([H])C([H])=C([H])C=6[H])C4([H])[H])C1([H])C3([H])[H])=C([H])C([H])=C([H])C=5[H])C(…	Active
C([H])([H])([H])C([H])(C([H])([H])C([H])(C(N([H])C([H])(C([H])=C([H])S(C1C([H])=C([H])C([H])=C([H])C=1[H])(=O)=O)C([H])([H])C([H])([H])C1C([H])=C([H])C([H])=C([H])C=1[H])=O)N([H])C(C1([H])C([H])([H])C([H])([H])C(=O)C([H])([H])C1([H])[H])=O)C([H])([H])[H]	Active
C([H])([H])([H])C(OC(N([H])C([H])(C1C([H])=C(C(N([H])[H])=NO[H])C([H])=C([H])C=1[H])C(N([H])O[H])=O)=O)(C([H])([H])[H])C([H])([H])[H]	Active
C([H])([H])([H])C([H])([H])N1C([H])([H])C([H])([H])N(C2N=C(N([H])C3C([H])=C([H])C(N([H])C4C5C(=C([H])C(=C([H])C=5[H])Cl)N=C([H])C=4[H])=C([H])C=3[H])N=C(N([H])C3C([H])=C([H])C(Cl)=C([H])C=3[H])N=2)C([H])([H])C1([H])[H]	Active
ClC1C([H])=C2C(C(=C([H])C([H])=N2)N([H])N([H])C(C2C([H])=C([H])C([H])=C([H])C=2[H])=O)=C([H])C=1[H]	Active
C([H])([H])([H])C([H])(N(C(N1N=C(S(C2C([H])=C([H])C(Cl)=C([H])C=2[H])(=O)=O)N=C1[H])=O)C([H])([H])[H])C([H])([H])[H]	Active
C([H])([H])([H])OC1C([H])=C([H])C(N2C3C(=C([H])N=C4C=3C([H])=C(C3C([H])=NC(N([H])[H])=C([H])C=3[H])C([H])=C4[H])N(C([H])([H])[H])C2=O)=C([H])C=1[H]	Active
N([H])([H])C1([H])C([H])([H])C([H])([H])C([H])(N([H])C2=NN3C(=NC([H])=C3C3C([H])=C([H])C(N([H])C4C(F)=C([H])C(F)=C([H])N=4)=C([H])C=3[H])C([H])=C2[H])C([H])([H])C1([H])[H]	Active
N([H])([H])C1([H])C([H])([H])C([H])([H])C([H])(N([H])C2=NN3C(=NC([H])=C3C3C([H])=C([H])C(N([H])C4C(F)=C([H])C(Cl)=C([H])N=4)=C([H])C=3[H])C([H])=C2[H])C([H])([H])C1([H])[H]	Active
C([H])([H])([H])C1=C([H])C([H])=C(C(C([H])=C([H])C2C([H])=C([H])C(C(N3C([H])([H])C([H])([H])N(C4C5C(=C([H])C(=C([H])C=5[H])Cl)N=C([H])C=4[H])C([H])([H])C3([H])[H])=O)=C([H])C=2[H])=O)O1	Active
C([H])([H])([H])N(C(C([H])([H])N([H])C1C2C(=C([H])C(=C([H])C=2[H])Cl)N=C([H])C=1[H])(C([H])([H])[H])C([H])([H])[H])C([H])([H])[H]	Active
C([H])([H])([H])C([H])(C([H])([H])C([H])(C(N([H])C([H])(C([H])=O)C([H])([H])C([H])([H])C1C([H])=C([H])C([H])=C([H])C=1[H])=O)N([H])C(N1C([H])([H])C([H])([H])OC([H])([H])C1([H])[H])=O)C([H])([H])[H]	Active
O=C(N([H])C([H])([H])C([H])([H])C([H])([H])C([H])([H])N([H])C(C([H])([H])C1([H])C([H])([H])C([H])([H])C2(OOC3(C([H])([H])C([H])([H])C([H])([H])C([H])([H])C3([H])[H])OO2)C([H])([H])C1([H])[H])=O)C([H])([H])C1([H])C([H])([H])C([H])([H])C2(OOC3(C([H])([H])C([H])([H])C([H])([H])C([H])([H])C3([H])[H])OO2)C([H])([H])C1([H])[H]	Active
C([H])([H])([H])C([H])([H])N(C([H])([H])C1C([H])=C(C2C([H])=C([H])C(Cl)=C([H])C=2[H])C([H])=C(N([H])C2C3C(=C([H])C(=C([H])C=3[H])Cl)N=C([H])C=2[H])C=1[H])C([H])([H])C([H])([H])[H]	Active
C([H])([H])([H])C([H])(N([H])C1C2C(=C([H])C(=C([H])C=2[H])Cl)N=C([H])C=1[H])C([H])([H])C([H])([H])C([H])([H])N([H])[H]	Active
C([H])([H])([H])C([H])(C([H])([H])C([H])([H])C1=C(C(N([H])C([H])([H])C([H])([H])N2C([H])([H])C([H])([H])OC([H])([H])C2([H])[H])=O)N=C(N([H])C(C2N(C([H])([H])[H])C([H])=C(N([H])C(C3C([H])=C([H])C(C([H])=C([H])C4C([H])=C5C(C([H])=C([H])C([H])=C5[H])=C([H])C=4[H])=C([H])C=3[H])=O)C=2[H])=O)S1)C([H])([H])[H]	Active
C([H])([H])([H])C1(OOC2(C([H])([H])C([H])([H])C([H])([H])C([H])([H])C2([H])[H])OO1)C([H])([H])C([H])([H])C(N([H])C([H])([H])C([H])([H])N([H])C(C([H])([H])C([H])([H])C1(OOC2(C([H])([H])C([H])([H])C([H])([H])C([H])([H])C2([H])[H])OO1)C([H])([H])[H])=O)=O	Active
C([H])([H])([H])N1C([H])([H])C([H])([H])N(C2N=C(N([H])C3C([H])=C([H])C(N([H])C4C5C(=C([H])C(=C([H])C=5[H])Cl)N=C([H])C=4[H])=C([H])C=3[H])N=C(N([H])C3C([H])=C([H])C(Cl)=C([H])C=3[H])N=2)C([H])([H])C1([H])[H]	Active
FC1C([H])=C(N([H])C2N=C(N3C([H])([H])C([H])([H])C([H])([H])C([H])([H])C3([H])[H])N=C(N([H])C3C([H])=C([H])C(N([H])C4C5C(=C([H])C(=C([H])C=5[H])Cl)N=C([H])C=4[H])=C([H])C=3[H])N=2)C([H])=C([H])C=1[H]	Active
C([H])([H])([H])OC1C([H])=C([H])C(C([H])=C([H])C(C2C([H])=C([H])C(N3N=C([H])N=C3[H])=C([H])C=2[H])=O)=C([H])C=1[H]	Active
C([H])([H])([H])C1=C([H])C(N([H])S(C2C([H])=C([H])C(N([H])C3C4C(=C([H])C(=C([H])C=4[H])Cl)N=C([H])C=3[H])=C([H])C=2[H])(=O)=O)=NO1	Active
C([H])([H])([H])N([H])C(C([H])([H])C([H])([H])C([H])([H])C([H])([H])C([H])([H])C([H])(C1N([H])C(C2C([H])=C3C(C([H])=C([H])C([H])=C3[H])=C([H])C=2[H])=C([H])N=1)N([H])C(C12C([H])([H])C([H])([H])N(C([H])([H])C1([H])[H])C([H])([H])C2([H])[H])=O)=O	Active
C([H])([H])([H])C1([H])C2([H])C34OOC(C([H])([H])C2([H])[H])(C([H])([H])[H])OC3([H])OC([H])(OC(C([H])([H])C([H])([H])C(N([H])C([H])([H])C([H])([H])C([H])([H])C([H])([H])C([H])([H])C([H])([H])C([H])([H])C([H])([H])N([H])C(C([H])([H])C([H])([H])C(OC2([H])C([H])(C([H])([H])[H])C3([H])C56OOC(C([H])([H])[H])(OC5([H])O2)C([H])([H])C([H])([H])C6([H])C([H])(C([H])([H])C3([H])[H])C([H])([H])[H])=O)=O)=O)=O…	Active
C([H])([H])([H])C([H])([H])OC(C1C(=O)C2C(=C([H])C(=C([H])C=2[H])C([H])([H])C2C([H])=C([H])C([H])=C([H])C=2[H])N([H])C=1[H])=O	Active
C([H])([H])([H])C([H])(C1([H])C2(C([H])(C3([H])C([H])(C([H])([H])C2([H])[H])C2(C([H])(C([H])([H])C([H])(OC(C([H])([H])[H])=O)C([H])([H])C2([H])[H])C([H])(OC(C([H])([H])[H])=O)C3([H])OC(C([H])([H])[H])=O)C([H])([H])[H])C([H])([H])C1([H])[H])C([H])([H])[H])C([H])([H])C([H])([H])C1N=C2C(C([H])=C([H])C([H])=C2[H])=C(C([H])(C2([H])N3C([H])([H])C([H])(C([H])(C([H])([H])C3([H])[H])C2([H])[H])C([H])=C([H…	Active
C([H])([H])([H])C([H])(C1([H])C2(C([H])(C3([H])C([H])(C([H])([H])C2([H])OC(C([H])([H])[H])=O)C2(C([H])(C([H])([H])C([H])(OC(C([H])([H])[H])=O)C([H])([H])C2([H])[H])C([H])([H])C3([H])OC(C([H])([H])[H])=O)C([H])([H])[H])C([H])([H])C1([H])[H])C([H])([H])[H])C([H])([H])C([H])([H])C1N=C2C(C([H])=C([H])C([H])=C2[H])=C(C([H])(C2([H])N3C([H])([H])C([H])(C([H])(C([H])([H])C3([H])[H])C2([H])[H])C([H])=C([H…	Active
C([H])([H])([H])C1(OOC2(C([H])([H])C([H])([H])C([H])([H])C([H])([H])C2([H])[H])OO1)C([H])([H])C([H])([H])C(N([H])C1C([H])=C(N([H])[H])C([H])=C([H])C=1[H])=O	Active
C([H])([H])([H])C([H])(C1([H])C2(C([H])(C3([H])C([H])(C([H])([H])C2([H])[H])C2(C([H])(C([H])([H])C([H])(OC(C([H])([H])[H])=O)C([H])([H])C2([H])[H])C([H])(OC(C([H])([H])[H])=O)C3([H])[H])C([H])([H])[H])C([H])([H])C1([H])[H])C([H])([H])[H])C([H])([H])C([H])([H])C1N=C2C(C([H])=C([H])C([H])=C2[H])=C(C([H])(C2([H])N3C([H])([H])C([H])(C([H])(C([H])([H])C3([H])[H])C2([H])[H])C([H])=C([H])[H])O[H])C=1[H]	Active
C([H])([H])([H])C(OC(N([H])C([H])(C1C([H])=C([H])C(C(N([H])[H])=NO[H])=C([H])C=1[H])C(N([H])O[H])=O)=O)(C([H])([H])[H])C([H])([H])[H]	Active
C([H])([H])([H])C([H])([H])C(N([H])C([H])(C1C([H])=C([H])C(N2N=C([H])C([H])=C2[H])=C([H])C=1[H])C(N([H])O[H])=O)=O	Active
C([H])([H])([H])C([H])(C(N([H])C([H])(C1C([H])=C([H])C(N2N=C([H])C([H])=C2[H])=C([H])C=1[H])C(N([H])O[H])=O)=O)C([H])([H])[H]	Active
C([H])([H])([H])OC1C(OC([H])([H])[H])=C(OC([H])([H])[H])C([H])=C(C([H])=C([H])C(C2C([H])=C([H])C(N3C([H])=C([H])C([H])=C3[H])=C([H])C=2[H])=O)C=1[H]	Active
C([H])([H])([H])C([H])([H])N([H])C(ON(C(C([H])([H])C([H])([H])C([H])(P(OC([H])([H])OC(OC([H])(C([H])([H])[H])C([H])([H])[H])=O)(OC([H])([H])OC(OC([H])(C([H])([H])[H])C([H])([H])[H])=O)=O)C1C([H])=C(F)C(F)=C([H])C=1[H])=O)C([H])([H])[H])=O	Active
N([H])([H])C1([H])C([H])([H])C([H])([H])C([H])(N([H])C2=NN3C(=NC([H])=C3C3C([H])=C([H])C(N([H])C4C(F)=C([H])C([H])=C([H])N=4)=C([H])C=3[H])C([H])=C2[H])C([H])([H])C1([H])[H]	Active
O([H])N(C([H])=O)C([H])([H])C([H])([H])C([H])([H])P(O[H])(O[H])=O	Active
C([H])([H])([H])C([H])([H])OC(C1C(=O)C2C(=C([H])C(=C(C=2[H])F)N2C([H])([H])C([H])([H])N([H])C([H])([H])C2([H])[H])N(C2([H])C([H])([H])C2([H])[H])C=1[H])=O	Active
C([H])([H])([H])C([H])([H])N(C([H])([H])C1C(O[H])=C(C2C([H])=C([H])C(Cl)=C([H])C=2[H])C([H])=C(N([H])C2C3C(=C([H])C(=C([H])C=3[H])Cl)N=C([H])C=2[H])C=1[H])C([H])([H])C([H])([H])[H]	Active
C([H])([H])([H])OC1C([H])=C2C(N=C([H])C([H])=C2C([H])(C2([H])N3C([H])([H])C([H])(C([H])(C([H])([H])C3([H])[H])C2([H])[H])C([H])=C([H])[H])OC([H])([H])C([H])([H])C2N=NN(C([H])([H])C3C([H])=C([H])C([H])=C([H])C=3[H])C=2[H])=C([H])C=1[H]	Active
C([H])([H])([H])C1C(=O)C2C(=C([H])C([H])=C([H])C=2[H])N([H])C=1C1C([H])=C(C2C([H])=C(Cl)C(Cl)=C([H])C=2[H])C([H])=NC=1[H]	Active
C([H])([H])([H])C1(OOC2(C([H])([H])C([H])([H])C([H])([H])C([H])([H])C2([H])[H])OO1)C([H])([H])C([H])([H])C(N([H])C([H])([H])C([H])([H])C([H])([H])N([H])C(C([H])([H])C([H])([H])C1(OOC2(C([H])([H])C([H])([H])C([H])([H])C([H])([H])C2([H])[H])OO1)C([H])([H])[H])=O)=O	Active
FC1C([H])=C([H])C(N([H])C2N=C(N3C([H])([H])C([H])([H])C([H])([H])C([H])([H])C3([H])[H])N=C(N([H])C3C([H])=C([H])C(N([H])C4C5C(=C([H])C(=C([H])C=5[H])Cl)N=C([H])C=4[H])=C([H])C=3[H])N=2)=C([H])C=1[H]	Active
ClC1C([H])=C2C(C(=C([H])C([H])=N2)N([H])C2C([H])=C([H])C(S(N([H])C3SC([H])=C([H])N=3)(=O)=O)=C([H])C=2[H])=C([H])C=1[H]	Active
C([H])([H])([H])OC1C(OC([H])([H])[H])=C(OC([H])([H])[H])C([H])=C(C([H])=C([H])C(C2C([H])=C([H])C(N3C([H])([H])C([H])([H])N([H])C([H])([H])C3([H])[H])=C([H])C=2[H])=O)C=1[H]	Active
C([H])([H])([H])C([H])([H])C([H])([H])C([H])([H])OC(OC([H])([H])OP(C([H])(C1C([H])=C(F)C(F)=C([H])C=1[H])C([H])([H])C([H])([H])C(N(O[H])C([H])([H])[H])=O)(OC([H])([H])OC(OC([H])([H])C([H])([H])C([H])([H])C([H])([H])[H])=O)=O)=O	Active
C([H])([H])([H])C1(C([H])([H])C2N=C3C(=C(C=2C([H])([H])C1([H])[H])N([H])C([H])([H])C([H])([H])C([H])([H])C([H])([H])C([H])([H])C([H])([H])N([H])C1C2C(=C([H])C(=C([H])C=2[H])Cl)N=C2C=1C([H])([H])C([H])([H])C(C2([H])[H])(C([H])([H])[H])C([H])([H])[H])C([H])=C([H])C(Cl)=C3[H])C([H])([H])[H]	Active
C([H])([H])([H])C1([H])C([H])([H])C2C(=NC3C(C=2N([H])C([H])([H])C([H])([H])C([H])([H])C([H])([H])C([H])([H])C([H])([H])N([H])C2C4C(=C([H])C(=C([H])C=4[H])Cl)N=C4C=2C([H])([H])C([H])(C([H])([H])C4([H])[H])C([H])([H])[H])=C([H])C([H])=C(Cl)C=3[H])C([H])([H])C1([H])[H]	Active
C([H])([H])([H])N1C([H])([H])C([H])([H])C([H])(N([H])C2=NN3C(=NC([H])=C3C3C([H])=NC(N([H])C4C(F)=C([H])C([H])=C([H])N=4)=C([H])C=3[H])C([H])=C2[H])C([H])([H])C1([H])[H]	Active
C([H])([H])([H])C([H])([H])OC(C1C(=O)C2C(=C([H])C(=C([H])C=2[H])OC2C([H])=C([H])C(OC(F)(F)F)=C([H])C=2[H])N([H])C=1[H])=O	Active
C([H])([H])([H])OC1C([H])=C2C(N=C([H])C([H])=C2C([H])(C2([H])N3C([H])([H])C([H])(C([H])(C([H])([H])C3([H])[H])C2([H])[H])C([H])=C([H])[H])OC([H])([H])C([H])([H])C2N=NN(C([H])([H])C([H])([H])C([H])([H])C3C([H])=C([H])C([H])=C([H])C=3[H])C=2[H])=C([H])C=1[H]	Active
C([H])([H])([H])C([H])([H])OC(C1C(=O)C2C(=C([H])C([H])=C(C=2[H])C([H])([H])C2C([H])=C([H])C([H])=C([H])C=2[H])N([H])C=1[H])=O	Active
C([H])([H])([H])OC1C([H])=C2C(N=C(C([H])=C2C([H])(C2([H])N3C([H])([H])C([H])(C([H])(C([H])([H])C3([H])[H])C2([H])[H])C([H])=C([H])[H])O[H])C([H])([H])C([H])([H])C([H])(C2([H])C3(C([H])(C4([H])C([H])(C([H])([H])C3([H])OC(C([H])([H])[H])=O)C3(C([H])(C([H])([H])C([H])(OC(C([H])([H])[H])=O)C([H])([H])C3([H])[H])C([H])([H])C4([H])OC(C([H])([H])[H])=O)C([H])([H])[H])C([H])([H])C2([H])[H])C([H])([H])[H]…	Active
O=C(N([H])C1C([H])=C(N([H])C(C([H])([H])C2([H])C([H])([H])C([H])([H])C3(OOC4(C5([H])C([H])([H])C6([H])C([H])([H])C([H])(C([H])([H])C4([H])C6([H])[H])C5([H])[H])OO3)C([H])([H])C2([H])[H])=O)C([H])=C([H])C=1[H])C([H])([H])C1([H])C([H])([H])C([H])([H])C2(OOC3(C4([H])C([H])([H])C5([H])C([H])([H])C([H])(C([H])([H])C3([H])C5([H])[H])C4([H])[H])OO2)C([H])([H])C1([H])[H]	Active
O=C(N([H])C1C([H])=C([H])C(N([H])C(C([H])([H])C2([H])C([H])([H])C([H])([H])C3(OOC4(C5([H])C([H])([H])C6([H])C([H])([H])C([H])(C([H])([H])C4([H])C6([H])[H])C5([H])[H])OO3)C([H])([H])C2([H])[H])=O)=C([H])C=1[H])C([H])([H])C1([H])C([H])([H])C([H])([H])C2(OOC3(C4([H])C([H])([H])C5([H])C([H])([H])C([H])(C([H])([H])C3([H])C5([H])[H])C4([H])[H])OO2)C([H])([H])C1([H])[H]	Active
C([H])([H])([H])OC1C([H])=C2C(N=C(C([H])=C2C([H])(C2([H])N3C([H])([H])C([H])(C([H])(C([H])([H])C3([H])[H])C2([H])[H])C([H])=C([H])[H])O[H])C([H])([H])C([H])([H])C([H])(C2([H])C3(C([H])(C4([H])C([H])(C([H])([H])C3([H])[H])C3(C([H])(C([H])([H])C([H])(OC(C([H])([H])[H])=O)C([H])([H])C3([H])[H])C([H])(OC(C([H])([H])[H])=O)C4([H])[H])C([H])([H])[H])C([H])([H])C2([H])[H])C([H])([H])[H])C([H])([H])[H])=…	Active
C([H])([H])([H])C(N([H])C([H])(C1C([H])=C([H])C(N2N=C([H])C([H])=C2[H])=C([H])C=1[H])C(N([H])O[H])=O)=O	Active
O([H])N([H])C(C([H])(C1C([H])=C([H])C(N2N=C([H])C([H])=C2[H])=C([H])C=1[H])N([H])C(C1C([H])=C([H])C(F)=C([H])C=1[H])=O)=O	Active
C([H])([H])([H])C1(OOC2(C([H])([H])C([H])([H])C([H])([H])C([H])([H])C2([H])[H])OO1)C([H])([H])C([H])([H])C(N([H])C([H])([H])C([H])([H])C([H])([H])C([H])([H])N([H])C(C([H])([H])C([H])([H])C1(OOC2(C([H])([H])C([H])([H])C([H])([H])C([H])([H])C2([H])[H])OO1)C([H])([H])[H])=O)=O	Active
ClC1C([H])=C2C(C(=C([H])C([H])=N2)N([H])N([H])C(C2C([H])=NC([H])=C([H])C=2[H])=O)=C([H])C=1[H]	Active
ClC1C([H])=C2C(C(=C([H])C([H])=N2)N([H])C2C([H])=C([H])C(S(N([H])C3N=C([H])C([H])=C([H])N=3)(=O)=O)=C([H])C=2[H])=C([H])C=1[H]	Active
C([H])([H])([H])C(N([H])C([H])([H])C1C([H])=C(N([H])C2C3C(=C([H])C(=C([H])C=3[H])Cl)N=C([H])C=2[H])C([H])=C(Br)C=1[H])(C([H])([H])[H])C([H])([H])[H]	Active
C([H])([H])([H])N([H])C(C([H])([H])C([H])([H])C([H])([H])C([H])([H])C([H])([H])C([H])(C1N([H])C(C2C(OC([H])([H])[H])=NC3C(=C([H])C([H])=C([H])C=3[H])C=2[H])=C([H])N=1)N([H])C(C12C([H])([H])C([H])([H])N(C([H])([H])C1([H])[H])C([H])([H])C2([H])[H])=O)=O	Active
C([H])([H])([H])N1C2C([H])=NC3C(C=2N(C2([H])C([H])([H])C2([H])[H])C1=O)=C([H])C(C1C([H])=NC(N([H])[H])=C([H])C=1[H])=C([H])C=3[H]	Active
C([H])([H])([H])C([H])(N([H])C1C2C(=C([H])C(=C([H])C=2[H])Cl)N=C([H])C=1[H])C([H])([H])C([H])([H])C([H])([H])N(C([H])([H])[H])C([H])([H])[H]	Active
C([H])([H])([H])C([H])(N([H])C1C2C(=C([H])C(=C([H])C=2[H])Cl)N=C([H])C=1[H])C([H])([H])C([H])([H])C([H])([H])N1C([H])([H])C([H])([H])N(C([H])([H])[H])C([H])([H])C1([H])[H]	Active
C([H])([H])([H])OC(C1N=NC(OC2C([H])=C3C(C([H])([H])OB3O[H])=C([H])C=2[H])=C([H])C=1[H])=O	Active
C([H])([H])([H])OC1C([H])=C2C(N=C(C([H])=C2C([H])(C2([H])N3C([H])([H])C([H])(C([H])(C([H])([H])C3([H])[H])C2([H])[H])C([H])=C([H])[H])O[H])C([H])([H])C([H])([H])C([H])(C2([H])C3(C([H])(C4([H])C([H])(C([H])([H])C3([H])OC(C([H])([H])[H])=O)C3(C([H])(C([H])([H])C([H])(OC(C([H])([H])[H])=O)C([H])([H])C3([H])[H])C([H])([H])C4([H])[H])C([H])([H])[H])C([H])([H])C2([H])[H])C([H])([H])[H])C([H])([H])[H])=…	Active
C([H])([H])([H])OC1C([H])=C(C([H])=C([H])C2C([H])=C([H])C(C(N([H])C3=C([H])N(C([H])([H])[H])C(C(N([H])C4SC(C([H])([H])C([H])([H])C([H])(C([H])([H])[H])C([H])([H])[H])=C(C(N([H])C([H])([H])C([H])([H])C([H])([H])N(C([H])([H])[H])C([H])([H])[H])=O)N=4)=O)=C3[H])=O)=C([H])C=2[H])C([H])=C([H])C=1[H]	Active
C([H])([H])([H])OC1C([H])=C(C([H])=C([H])C2C([H])=C(C(N([H])C3=C([H])N(C([H])([H])[H])C(C(N([H])C4SC(C([H])([H])C([H])([H])C([H])(C([H])([H])[H])C([H])([H])[H])=C(C(N([H])C([H])([H])C([H])([H])C([H])([H])N(C([H])([H])[H])C([H])([H])[H])=O)N=4)=O)=C3[H])=O)C([H])=C([H])C=2[H])C([H])=C([H])C=1[H]	Active
FC1C(N([H])C2N=C([H])C(C3N4C(C([H])=C([H])C(N5C([H])([H])C([H])([H])N([H])C([H])([H])C5([H])[H])=N4)=NC=3[H])=C([H])N=2)=NC([H])=C([H])C=1[H]	Active
C([H])([H])([H])N1C2C([H])=NC3C(C=2N(C2([H])C([H])([H])C([H])([H])C([H])([H])C([H])([H])C2([H])[H])C1=O)=C([H])C(C1C([H])=NC(N([H])[H])=C([H])C=1[H])=C([H])C=3[H]	Active
C([H])([H])([H])C([H])([H])N(C([H])([H])C([H])([H])C([H])([H])C([H])(N([H])C1C2C(=C([H])C(=C([H])C=2[H])Cl)N=C([H])C=1[H])C([H])([H])[H])C([H])([H])[H]	Active
C([H])([H])([H])OC1C([H])=C(OC([H])([H])[H])C(C(C([H])=C([H])C2C([H])=C([H])C(C(O[H])=O)=C([H])C=2[H])=O)=C([H])C=1[H]	Active
O([H])C(C1C([H])=C([H])C(C([H])=C([H])C(C2C(Cl)=C(Cl)C(Cl)=C([H])C=2[H])=O)=C([H])C=1[H])=O	Active
C([H])([H])([H])C([H])([H])C([H])([H])C([H])([H])C([H])([H])C([H])([H])C([H])([H])C([H])([H])N(C([H])([H])C([H])([H])C([H])([H])C([H])(N([H])C1C2C(=C([H])C(=C([H])C=2[H])Cl)N=C([H])C=1[H])C([H])([H])[H])C([H])([H])C([H])([H])C([H])([H])C([H])([H])C([H])([H])C([H])([H])C([H])([H])C([H])([H])[H]	Active
C([H])([H])([H])C([H])([H])OC(C1C(=O)C2C(=C([H])C([H])=C(C=2[H])OC2C([H])=C([H])C(OC(F)(F)F)=C([H])C=2[H])N([H])C=1[H])=O	Active
ClC1C([H])=C2C(C(=C([H])C([H])=N2)N([H])N([H])C2C([H])=C([H])C([H])=C([H])C=2[H])=C([H])C=1[H]	Active
C([H])([H])([H])C([H])([H])N(C(N1N=C(S(C2C(C([H])([H])[H])=C([H])C(C([H])([H])[H])=C([H])C=2C([H])([H])[H])(=O)=O)N=C1[H])=O)C([H])([H])[H]	Active
N([H])([H])C1([H])C([H])([H])C([H])([H])C([H])(N([H])C2=NN3C(=NC([H])=C3C3C([H])=NC(N([H])C4C(F)=C([H])C(C(F)(F)F)=C([H])N=4)=NC=3[H])C([H])=C2[H])C([H])([H])C1([H])[H]	Active
O([H])N([H])C(C([H])([H])C([H])([H])C([H])([H])C([H])([H])C([H])([H])ON([H])C(C1=C([H])C([H])=C([H])O1)=O)=O	Active
C([H])([H])([H])C([H])(N([H])C1C2C(=C([H])C(=C([H])C=2[H])Cl)N=C([H])C=1[H])C([H])([H])C([H])([H])C([H])([H])N1C([H])([H])C([H])([H])C([H])([H])C([H])([H])C1([H])[H]	Active
C([H])([H])([H])OC1C([H])=C2C(C(C(C([H])([H])[H])=C(C3C([H])=C(C4C([H])=C(Cl)C(Cl)=C([H])C=4[H])C([H])=NC=3[H])N2[H])=O)=C([H])C=1[H]	Active
C([H])([H])([H])C1(OOC2(C([H])([H])C([H])([H])C([H])([H])C([H])([H])C2([H])[H])OO1)C([H])([H])C([H])([H])C(N([H])C1C([H])=C([H])C(N([H])C(C([H])([H])C([H])([H])C2(OOC3(C([H])([H])C([H])([H])C([H])([H])C([H])([H])C3([H])[H])OO2)C([H])([H])[H])=O)=C([H])C=1[H])=O	Active
C([H])([H])([H])C(C(N([H])C([H])(C1C([H])=C([H])C(N2N=C([H])C([H])=C2[H])=C([H])C=1[H])C(N([H])O[H])=O)=O)(C([H])([H])[H])C([H])([H])[H]	Active
C([H])([H])([H])C1(OOC2(C([H])([H])C([H])([H])C([H])([H])C([H])([H])C2([H])[H])OO1)C([H])([H])C([H])([H])C(N([H])C1C([H])=C(N([H])C(C([H])([H])C([H])([H])C2(OOC3(C([H])([H])C([H])([H])C([H])([H])C([H])([H])C3([H])[H])OO2)C([H])([H])[H])=O)C([H])=C([H])C=1[H])=O	Active
C([H])([H])([H])OC1C([H])=C([H])C(C([H])=C([H])C(C2C([H])=C([H])C(N3C([H])([H])C([H])([H])OC([H])([H])C3([H])[H])=C([H])C=2[H])=O)=C([H])C=1[H]	Active
C([H])([H])([H])N1C2C([H])=NC3C(C=2N(C2C([H])=C([H])C([H])=C([H])C=2[H])C1=O)=C([H])C(C1C([H])=NC(N([H])[H])=C([H])C=1[H])=C([H])C=3[H]	Active
C([H])([H])([H])N([H])C(C([H])([H])C([H])([H])C([H])([H])C([H])([H])C([H])([H])C([H])(C1N([H])C(C2C([H])=C3C(C([H])=C(C(F)(F)F)N=C3[H])=C([H])C=2[H])=C([H])N=1)N([H])C(C1SC([H])=NC=1[H])=O)=O	Active
FC1C(N([H])C2N=C([H])C(C3N4C(C([H])=C([H])C(=N4)N([H])C4([H])C([H])([H])N([H])C([H])([H])C4([H])[H])=NC=3[H])=C([H])N=2)=NC([H])=C([H])C=1[H]	Active
C([H])([H])([H])C([H])(N([H])C1C2C(=C([H])C(=C([H])C=2[H])Cl)N=C([H])C=1[H])C([H])([H])C([H])([H])C([H])([H])N1C([H])([H])C([H])([H])C([H])([H])C1([H])[H]	Active
C([H])([H])([H])C(C(N([H])C([H])(C1C([H])=C([H])C(C2=C([H])SC([H])=C2[H])=C([H])C=1[H])C(N([H])O[H])=O)=O)(C([H])([H])[H])C([H])([H])[H]	Active
C([H])([H])([H])OC1C(OC([H])([H])[H])=C([H])C(C([H])=C([H])C(C2C([H])=C([H])C(N3C([H])([H])C([H])([H])C([H])([H])C([H])([H])C3([H])[H])=C([H])C=2[H])=O)=C([H])C=1[H]	Active
C([H])([H])([H])C([H])([H])N(C([H])([H])C([H])([H])C([H])([H])C([H])(N([H])C1C2C(=C([H])C(=C([H])C=2[H])Cl)N=C([H])C=1[H])C([H])([H])[H])C([H])([H])C([H])([H])[H]	Active
C([H])([H])([H])N1C2C([H])=NC3C(C=2N(C2C([H])=C([H])C(C#N)=C([H])C=2[H])C1=O)=C([H])C(C1C([H])=NC(N([H])[H])=C([H])C=1[H])=C([H])C=3[H]	Active
N([H])([H])C1N=C([H])C(C2C([H])=C3C(N=C([H])C4=C3N(C3C([H])=C([H])C(C#N)=C([H])C=3[H])C(=O)N4[H])=C([H])C=2[H])=C([H])C=1[H]	Active
O=C(N1N=C(S(C([H])([H])C2C([H])=C([H])C([H])=C([H])C=2[H])(=O)=O)N=C1[H])N1C([H])([H])C([H])([H])C([H])([H])C1([H])[H]	Active
C([H])([H])([H])N([H])C(C([H])([H])C([H])([H])C([H])([H])C([H])([H])C([H])([H])C([H])(C1N([H])C(C2C(=O)N([H])C3C(=C([H])C([H])=C([H])C=3[H])C=2[H])=C([H])N=1)N([H])C(C1SC([H])=NC=1[H])=O)=O	Active
O([H])C1C([H])=C([H])C(N([H])C(C2C(=O)OC(C3C([H])=C([H])C([H])=C([H])C=3[H])=C([H])C=2N2C([H])([H])C([H])([H])C([H])([H])C([H])([H])C2([H])[H])=O)=C([H])C=1[H]	Active
C([H])([H])([H])N1C([H])([H])C([H])([H])C([H])(C([H])([H])C2=NN3C(=NC([H])=C3C3C([H])=NC(N([H])C4C(F)=C([H])C([H])=C([H])N=4)=NC=3[H])C([H])=C2[H])C([H])([H])C1([H])[H]	Active
O([H])C1C(C([H])([H])N2C([H])([H])C([H])([H])C([H])([H])C2([H])[H])=C([H])C(N([H])C2C3C(=C([H])C(=C([H])C=3[H])Cl)N=C([H])C=2[H])=C([H])C=1[H]	Active
C([H])([H])([H])OC1C([H])=C2C(N=C([H])C([H])=C2C([H])(C2([H])N3C([H])([H])C([H])(C([H])(C([H])([H])C3([H])[H])C2([H])[H])C([H])=C([H])[H])OC([H])([H])C([H])([H])C2N=NN(C3C([H])=C([H])C(Cl)=C([H])C=3[H])C=2[H])=C([H])C=1[H]	Active
C([H])([H])([H])C([H])([H])N(C(C([H])(N1N=NC(C([H])([H])OC([H])(C2C3C(=C([H])C([H])=C(C=3[H])OC([H])([H])[H])N=C([H])C=2[H])C2([H])N3C([H])([H])C([H])(C([H])(C([H])([H])C3([H])[H])C2([H])[H])C([H])=C([H])[H])=C1[H])C([H])(C([H])([H])[H])C([H])([H])[H])=O)C([H])([H])C([H])([H])[H]	Active
N([H])([H])S(C1C([H])=C([H])C(N([H])C2C3C(=C([H])C(=C([H])C=3[H])Cl)N=C([H])C=2[H])=C([H])C=1[H])(=O)=O	Active
C([H])([H])([H])C(N1C(C([H])(C2C([H])=C([H])C([H])=C([H])C=2[H])N([H])C([H])([H])C([H])([H])C([H])([H])N([H])C2C3C(=C([H])C(=C([H])C=3[H])Cl)N=C([H])C=2[H])=NN=N1)(C([H])([H])[H])C([H])([H])[H]	Active
C([H])([H])([H])C([H])([H])N(C([H])([H])C1C(O[H])=C([H])C([H])=C(N([H])C2C3C(=C([H])C(=C([H])C=3[H])Cl)N=C([H])C=2[H])C=1[H])C([H])([H])C([H])([H])[H]	Active
C([H])([H])([H])C([H])(OC(OC([H])([H])OP(C([H])(C1C([H])=C(F)C(F)=C([H])C=1[H])C([H])([H])C([H])([H])C(N(OC(C(C([H])([H])[H])(C([H])([H])[H])C([H])([H])[H])=O)C([H])([H])[H])=O)(OC([H])([H])OC(OC([H])(C([H])([H])[H])C([H])([H])[H])=O)=O)=O)C([H])([H])[H]	Active
C([H])([H])([H])N1C2C([H])=NC3C(C=2N(C2C([H])=C(C(F)(F)F)C([H])=C([H])C=2[H])C1=O)=C([H])C(C1C([H])=C2C(N([H])C([H])=N2)=C([H])C=1[H])=C([H])C=3[H]	Active
O([H])N([H])C(C([H])([H])C([H])([H])C([H])([H])C([H])([H])C([H])([H])C([H])([H])C(N([H])C1C([H])=C([H])C([H])=C([H])C=1[H])=O)=O	Active
C([H])([H])([H])C1([H])C2([H])C34OOC(C([H])([H])C2([H])[H])(C([H])([H])[H])OC3([H])OC([H])(OC(C([H])([H])C([H])([H])C(OC2([H])C([H])(C([H])([H])[H])C3([H])C56OOC(C([H])([H])[H])(OC5([H])O2)C([H])([H])C([H])([H])C6([H])C([H])(C([H])([H])C3([H])[H])C([H])([H])[H])=O)=O)C([H])(C4([H])C([H])([H])C1([H])[H])C([H])([H])[H]	Active
C([H])([H])([H])N1C2C(=C([H])C(=C([H])C=2[H])OC(F)(F)F)C2C(C3C(N=2)=C([H])C([H])=C(Br)C=3[H])=C1[H]	Active
N([H])=C(N([H])C(N([H])C([H])([H])C([H])([H])C([H])(C1C([H])=C([H])C([H])=C([H])C=1[H])C1C([H])=C([H])C([H])=C([H])C=1[H])=N[H])N([H])C([H])([H])C([H])([H])C([H])([H])N([H])C([H])([H])C([H])([H])C([H])([H])C([H])([H])C([H])([H])C([H])([H])C([H])([H])N([H])C([H])([H])C([H])([H])C([H])([H])N([H])C(N([H])C(N([H])C([H])([H])C([H])([H])C([H])(C1C([H])=C([H])C([H])=C([H])C=1[H])C1C([H])=C([H])C([H])=C(…	Active
O([H])B1C2C(=C([H])C([H])=C(C=2[H])OC2C([H])=NC(C(O[H])=O)=C([H])C=2[H])C([H])([H])O1	Active
C([H])([H])([H])OC1C(OC([H])([H])[H])=C(OC([H])([H])[H])C(C([H])=C([H])C(C2C(=O)OC3C(=C([H])C([H])=C([H])C=3[H])C=2[H])=O)=C([H])C=1[H]	Active
C([H])([H])([H])OC1C(OC([H])([H])[H])=C(OC([H])([H])[H])C([H])=C(C([H])=C([H])C(C2C([H])=C([H])C(N3C([H])([H])C([H])([H])C([H])([H])C3([H])[H])=C([H])C=2[H])=O)C=1[H]	Active
C([H])([H])([H])N1C2C([H])=NC3C(C=2N(C2C([H])=C(C(F)(F)F)C([H])=C([H])C=2[H])C1=O)=C([H])C(C1C([H])=NC(N([H])C(C([H])([H])[H])=O)=C([H])C=1[H])=C([H])C=3[H]	Active
FC1C(N([H])C2N=C([H])C(C3N4C(C([H])=C([H])C(=N4)N([H])C4([H])C([H])([H])C([H])([H])C([H])(N5C([H])([H])C([H])([H])OC([H])([H])C5([H])[H])C([H])([H])C4([H])[H])=NC=3[H])=C([H])N=2)=NC([H])=C([H])C=1[H]	Active
C([H])([H])([H])OC1C([H])=C([H])C(C([H])(P(O[H])(O[H])=O)OC([H])([H])C(N(O[H])C([H])([H])[H])=O)=C([H])C=1[H]	Active
C([H])([H])([H])C(C1C([H])=C([H])C(F)=C([H])C=1[H])=NN=C(C([H])([H])C([H])(C1C2C(=C([H])C([H])=C([H])C=2[H])C([H])=C([H])C=1[H])O[H])N([H])[H]	Active
C([H])([H])([H])N([H])C(C([H])([H])C([H])([H])C([H])([H])C([H])([H])C([H])([H])C([H])(C1N([H])C(C2C([H])=C3C(N([H])N=C3[H])=C([H])C=2[H])=C([H])N=1)N([H])C(C1SC([H])=NC=1[H])=O)=O	Active
C([H])([H])([H])C(N([H])C([H])([H])C1C(O[H])=C([H])C([H])=C(N([H])C2C3C(=C([H])C(=C([H])C=3[H])Cl)N=C([H])C=2[H])C=1[H])(C([H])([H])[H])C([H])([H])[H]	Active
C([H])([H])([H])C([H])([H])N([H])C([H])([H])C1C(O[H])=C([H])C([H])=C(N([H])C2C3C(=C([H])C(=C([H])C=3[H])Cl)N=C([H])C=2[H])C=1[H]	Active
C([H])([H])([H])OC1C([H])=C2C(N=C([H])C([H])=C2C([H])(C2([H])N3C([H])([H])C([H])(C([H])(C([H])([H])C3([H])[H])C2([H])[H])C([H])=C([H])[H])OC([H])([H])C([H])([H])C2N=NN(C3C([H])=C([H])C(C([H])([H])[H])=C([H])C=3[H])C=2[H])=C([H])C=1[H]	Active
C([H])([H])([H])OC1C([H])=C2C(N=C([H])C([H])=C2C([H])(C2([H])N3C([H])([H])C([H])(C([H])(C([H])([H])C3([H])[H])C2([H])[H])C([H])=C([H])[H])OC([H])([H])C2N=NN(C([H])([H])C3C([H])=C([H])C(C([H])([H])[H])=C([H])C=3[H])C=2[H])=C([H])C=1[H]	Active
C([H])([H])([H])C([H])(OC(OC([H])([H])OP(C([H])(C1C([H])=C(F)C(F)=C([H])C=1[H])C([H])([H])C([H])([H])C(N(OC(C([H])([H])[H])=O)C([H])([H])[H])=O)(OC([H])([H])OC(OC([H])(C([H])([H])[H])C([H])([H])[H])=O)=O)=O)C([H])([H])[H]	Active
FC1C(N([H])C2N=C([H])C(C3N4C(C([H])=C([H])C(=N4)N([H])C4([H])C([H])([H])C([H])([H])C([H])(N5C([H])([H])C([H])([H])C([H])([H])C5([H])[H])C([H])([H])C4([H])[H])=NC=3[H])=C([H])N=2)=NC([H])=C([H])C=1[H]	Active
C([H])([H])([H])N(C(N1N=C(S(C2([H])C3([H])C([H])([H])C([H])(C([H])([H])C3([H])[H])C2([H])[H])(=O)=O)N=C1[H])=O)C([H])([H])C1C([H])=NC([H])=C([H])C=1[H]	Active
C([H])([H])([H])C([H])(OC1C([H])=C([H])C(C(N([H])OC([H])([H])C([H])([H])C([H])([H])C([H])([H])C([H])([H])C(N([H])O[H])=O)=O)=C([H])C=1[H])C([H])([H])[H]	Active
C([H])([H])([H])C([H])([H])C([H])([H])C([H])([H])OC1C([H])=C([H])C(C(N([H])OC([H])([H])C([H])([H])C([H])([H])C([H])([H])C([H])([H])C(N([H])O[H])=O)=O)=C([H])C=1[H]	Active
C([H])([H])([H])C([H])([H])C([H])([H])OC1C([H])=C([H])C(C(N([H])OC([H])([H])C([H])([H])C([H])([H])C([H])([H])C([H])([H])C(N([H])O[H])=O)=O)=C([H])C=1[H]	Active
C([H])([H])([H])C([H])([H])C([H])([H])C([H])([H])C([H])([H])OC1C([H])=C([H])C(C(N([H])OC([H])([H])C([H])([H])C([H])([H])C([H])([H])C([H])([H])C(N([H])O[H])=O)=O)=C([H])C=1[H]	Active
C([H])([H])([H])N1C([H])([H])C([H])(N([H])C2=NN3C(=NC([H])=C3C3C([H])=NC(N([H])C4C(F)=C([H])C([H])=C([H])N=4)=NC=3[H])C([H])=C2[H])C([H])([H])C1([H])[H]	Active
C([H])([H])([H])N([H])C(C([H])([H])C([H])([H])C([H])([H])C([H])([H])C([H])([H])C([H])(C1N([H])C(C2C([H])=C3C(N([H])C([H])=C3[H])=C([H])C=2[H])=C([H])N=1)N([H])C(C1SC([H])=NC=1[H])=O)=O	Active
C([H])([H])([H])C([H])([H])C([H])([H])C([H])([H])C([H])([H])C([H])([H])OC1C([H])=C([H])C(C(N([H])OC([H])([H])C([H])([H])C([H])([H])C([H])([H])C([H])([H])C(N([H])O[H])=O)=O)=C([H])C=1[H]	Active
C([H])([H])([H])N([H])C(C([H])([H])C([H])([H])C([H])([H])C([H])([H])C([H])([H])C([H])(C1N([H])C(C2C([H])=C([H])C(N3N=C([H])C([H])=C3[H])=C([H])C=2[H])=C([H])N=1)N([H])C(C1SC([H])=NC=1[H])=O)=O	Active
C([H])([H])([H])C1([H])C2([H])C34OOC(C([H])([H])C2([H])[H])(C([H])([H])[H])OC3([H])OC([H])(C([H])([H])C([H])(C([H])([H])C2([H])C([H])(C([H])([H])[H])C3([H])C56OOC(C([H])([H])[H])(OC5([H])O2)C([H])([H])C([H])([H])C6([H])C([H])(C([H])([H])C3([H])[H])C([H])([H])[H])C([H])([H])O[H])C([H])(C4([H])C([H])([H])C1([H])[H])C([H])([H])[H]	Active
C([H])([H])([H])C([H])(C([H])([H])C([H])([H])OC(C1N=C([H])C(OC2C([H])=C3C(C([H])([H])OB3O[H])=C([H])C=2[H])=NC=1[H])=O)C([H])([H])[H]	Active
C([H])([H])([H])C1([H])C2([H])C34OOC(C([H])([H])C2([H])[H])(C([H])([H])[H])OC3([H])OC([H])(C([H])([H])C([H])([H])C([H])([H])O[H])C([H])(C4([H])C([H])([H])C1([H])[H])C([H])([H])[H]	Active
C([H])([H])([H])C([H])([H])OC(C1C(=O)C2C(=C([H])C(=C([H])C=2[H])OC2C([H])=C([H])C([H])=C([H])C=2[H])N([H])C=1[H])=O	Active
O=C(N([H])C1C([H])=C([H])C([H])=C([H])C=1[H])N([H])C([H])([H])C([H])([H])C([H])([H])N([H])C([H])([H])C([H])([H])C([H])([H])C([H])([H])C([H])([H])C([H])([H])N([H])C([H])([H])C([H])([H])C([H])([H])N([H])C(N([H])C1C([H])=C([H])C([H])=C([H])C=1[H])=O	Active
O=C(N([H])C1C([H])=C([H])C([H])=C([H])C=1[H])N([H])C([H])([H])C([H])([H])C([H])([H])N([H])C([H])([H])C([H])([H])C([H])([H])C([H])([H])C([H])([H])N([H])C([H])([H])C([H])([H])C([H])([H])N([H])C(N([H])C1C([H])=C([H])C([H])=C([H])C=1[H])=O	Active
C([H])([H])([H])C(C(N([H])C([H])(C1C([H])=C([H])C(C(N([H])[H])=NO[H])=C([H])C=1[H])C(N([H])O[H])=O)=O)(C([H])([H])[H])C([H])([H])[H]	Active
C([H])([H])([H])C(C([H])([H])OC(C1N=C([H])C(OC2C([H])=C3C(C([H])([H])OB3O[H])=C([H])C=2[H])=NC=1[H])=O)(N([H])[H])C([H])([H])[H]	Active
S=C(N([H])C1C([H])=C([H])C([H])=C([H])C=1[H])N([H])C([H])([H])C([H])([H])C([H])([H])N([H])C([H])([H])C([H])([H])C([H])([H])C([H])([H])C([H])([H])C([H])([H])N([H])C([H])([H])C([H])([H])C([H])([H])N([H])C(N([H])C1C([H])=C([H])C([H])=C([H])C=1[H])=S	Active
C([H])([H])([H])OC1C([H])=C([H])C(C([H])=C([H])C(C2C([H])=C([H])C(N3C([H])([H])C([H])([H])C([H])([H])C3([H])[H])=C([H])C=2[H])=O)=C([H])C=1[H]	Active
C([H])([H])([H])C1([H])C2([H])C34OOC(C([H])([H])C2([H])[H])(C([H])([H])[H])OC3([H])OC(=O)C([H])(C4([H])C([H])([H])C1([H])[H])C([H])([H])[H]	Active
N([H])([H])C1([H])C([H])([H])C([H])([H])C([H])(N([H])C2=NN3C(=NC([H])=C3C3C([H])=NC(N([H])C4C(F)=C([H])C([H])=C([H])N=4)=NC=3[H])C([H])=C2[H])C([H])([H])C1([H])[H]	Active
C([H])([H])([H])N1C([H])([H])C([H])([H])C([H])(N([H])C2=NN3C(=NC([H])=C3C3C([H])=NC(N([H])C4C(F)=C([H])C([H])=C([H])N=4)=NC=3[H])C([H])=C2[H])C([H])([H])C1([H])[H]	Active
C([H])([H])([H])SC1C(C(N([H])C2SC([H])=C(C3N=C([H])C([H])=C([H])C=3[H])N=2)=O)=C([H])C([H])=C([H])C=1[H]	Active
C([H])([H])([H])C([H])(C([H])([H])C([H])(C([H])(C([H])([H])C(N([H])C([H])([H])C([H])([H])C1C([H])=C([H])C([H])=C([H])C=1[H])=O)O[H])N([H])C(C([H])(C([H])(C([H])([H])[H])C([H])([H])[H])N([H])C(C([H])(N([H])C(OC([H])([H])C1C([H])=C([H])C([H])=C([H])C=1[H])=O)C([H])([H])C([H])([H])ON([H])C(N([H])[H])=N[H])=O)=O)C([H])([H])[H]	Active
C([H])([H])([H])C([H])([H])OC1C([H])=C([H])C(C(N([H])OC([H])([H])C([H])([H])C([H])([H])C([H])([H])C([H])([H])C(N([H])O[H])=O)=O)=C([H])C=1[H]	Active
C([H])([H])([H])C([H])([H])C([H])([H])C([H])([H])C1C([H])=C([H])C(C(N([H])OC([H])([H])C([H])([H])C([H])([H])C([H])([H])C([H])([H])C(N([H])O[H])=O)=O)=C([H])C=1[H]	Active
C([H])([H])([H])OC1C([H])=C([H])C(C([H])=NN=C(C([H])([H])C([H])(C2C([H])=C3C(C([H])=C([H])C([H])=C3[H])=C([H])C=2[H])O[H])N([H])[H])=C([H])C=1[H]	Active
C([H])([H])([H])C1C([H])=NC(N([H])C2N=C([H])C(C3N4C(C([H])=C([H])C(=N4)N([H])C4([H])C([H])([H])C([H])([H])C([H])(N([H])[H])C([H])([H])C4([H])[H])=NC=3[H])=C([H])N=2)=C([H])C=1[H]	Active
C([H])([H])([H])C([H])([H])C([H])([H])C([H])([H])OC(C1N=C([H])C(OC2C([H])=C3C(C([H])([H])OB3O[H])=C([H])C=2[H])=NC=1[H])=O	Active
C([H])([H])([H])C1C(=O)C2C(=C([H])C([H])=C([H])C=2[H])N([H])C=1C1C([H])=C(C2C([H])=C([H])C(OC(F)(F)F)=C([H])C=2[H])N=C([H])C=1[H]	Active
S=C(N([H])C([H])([H])C1C([H])=C([H])C([H])=C([H])C=1[H])N([H])C([H])([H])C([H])([H])C([H])([H])N([H])C([H])([H])C([H])([H])C([H])([H])C([H])([H])C([H])([H])C([H])([H])N([H])C([H])([H])C([H])([H])C([H])([H])N([H])C(N([H])C([H])([H])C1C([H])=C([H])C([H])=C([H])C=1[H])=S	Active
S=C(N([H])C([H])([H])C1C([H])=C([H])C([H])=C([H])C=1[H])N([H])C([H])([H])C([H])([H])C([H])([H])N([H])C([H])([H])C([H])([H])C([H])([H])C([H])([H])C([H])([H])N([H])C([H])([H])C([H])([H])C([H])([H])N([H])C(N([H])C([H])([H])C1C([H])=C([H])C([H])=C([H])C=1[H])=S	Active
C([H])([H])([H])N1C2C(=C([H])C(C(F)(F)F)=C([H])C=2[H])C2C(C3C(N=2)=C([H])C([H])=C(Br)C=3[H])=C1[H]	Active
C([H])([H])([H])OC1C([H])=C2C(N=C([H])C([H])=C2C([H])(C2([H])N3C([H])([H])C([H])(C([H])(C([H])([H])C3([H])[H])C2([H])[H])C([H])=C([H])[H])OC([H])([H])C2N=NN(C([H])([H])C([H])([H])C([H])([H])C3C([H])=C([H])C([H])=C([H])C=3[H])C=2[H])=C([H])C=1[H]	Active
C([H])([H])([H])N1C2C([H])=NC3C(C=2N(C2C([H])=C([H])C(C(F)(F)F)=C([H])C=2[H])C1=O)=C([H])C(C1C([H])=NC(N([H])[H])=C([H])C=1[H])=C([H])C=3[H]	Active
C([H])([H])([H])N(C(N1N=C(S(C2([H])C3([H])C([H])([H])C([H])(C([H])([H])C3([H])[H])C2([H])[H])(=O)=O)N=C1[H])=O)C([H])([H])C1C(F)=C([H])C([H])=C([H])C=1[H]	Active
C([H])([H])([H])N(C(C([H])([H])C([H])([H])C([H])(P(OC([H])([H])OC(OC(C([H])([H])[H])(C([H])([H])[H])C([H])([H])[H])=O)(OC([H])([H])OC(OC(C([H])([H])[H])(C([H])([H])[H])C([H])([H])[H])=O)=O)C1C([H])=C(F)C(F)=C([H])C=1[H])=O)OC(C(C([H])([H])[H])(C([H])([H])[H])C([H])([H])[H])=O	Active
ClC1C([H])=C2C(N=C([H])C([H])=C2N2C([H])([H])C([H])([H])C([H])(C([H])([H])N3C([H])([H])C([H])([H])C([H])(C4C5C(=C([H])C([H])=C([H])C=5[H])N([H])C=4[H])C([H])([H])C3([H])[H])C([H])([H])C2([H])[H])=C([H])C=1[H]	Active
O([H])N([H])C(C([H])([H])C([H])([H])C([H])([H])C([H])([H])C([H])([H])ON([H])C(C1C([H])=C([H])C(C(F)(F)F)=C([H])C=1[H])=O)=O	Active
C([H])([H])([H])C1C2=C(C3C(N2[H])=C([H])C([H])=C([H])C=3[H])C(C([H])([H])[H])=C2C=1C([H])=C([H])N=C2[H]	Active
C([H])([H])([H])N(C(N1N=C(S(C2([H])C3([H])C([H])([H])C([H])(C([H])([H])C3([H])[H])C2([H])[H])(=O)=O)N=C1[H])=O)C([H])([H])C1C([H])=C(F)C([H])=C([H])C=1[H]	Active
N([H])([H])C1N=C([H])C(C2C([H])=C3C(N=C([H])C4=C3N(C3C([H])=C([H])C(C(F)(F)F)=C([H])C=3[H])C(=O)N4[H])=C([H])C=2[H])=C([H])C=1[H]	Active
C([H])([H])([H])N(C(N1N=C(S(C2([H])C3([H])C([H])([H])C([H])(C([H])([H])C3([H])[H])C2([H])[H])(=O)=O)N=C1[H])=O)C([H])([H])C1C([H])=C([H])C(Cl)=C([H])C=1[H]	Active
C([H])([H])([H])N(C(N1N=C(S(C2([H])C3([H])C([H])([H])C([H])(C([H])([H])C3([H])[H])C2([H])[H])(=O)=O)N=C1[H])=O)C([H])([H])C1C(Cl)=C([H])C([H])=C([H])C=1[H]	Active
C([H])([H])([H])C([H])(C([H])([H])C([H])(C(N([H])C([H])(C1C([H])=C([H])C([H])=C([H])C=1[H])C(N1C([H])(C([H])([H])OC2C([H])=C([H])C(F)=C([H])C=2[H])C([H])([H])C([H])([H])C1([H])[H])=O)=O)N([H])C(C([H])(N([H])C(N1C([H])([H])C([H])([H])OC([H])([H])C1([H])[H])=O)C([H])([H])C([H])(C([H])([H])[H])C([H])([H])[H])=O)C([H])([H])[H]	Active
C([H])([H])([H])C([H])(C([H])([H])OC(C1N=C([H])C(OC2C([H])=C3C(C([H])([H])OB3O[H])=C([H])C=2[H])=NC=1[H])=O)C([H])([H])[H]	Active
C([H])([H])([H])C([H])(OC(C1C(=O)C2C(=C([H])C(=C([H])C=2[H])OC2C([H])=C([H])C([H])=C([H])C=2[H])N([H])C=1[H])=O)C([H])([H])[H]	Active
C([H])([H])([H])OC1C([H])=C2C(C(C(C([H])([H])[H])=C(C3C([H])=C(C4C([H])=C([H])C(OC(F)(F)F)=C([H])C=4[H])N=C([H])C=3[H])N2[H])=O)=C([H])C=1[H]	Active
C([H])([H])([H])C(OC(C1N=C([H])C(OC2C([H])=C3C(C([H])([H])OB3O[H])=C([H])C=2[H])=NC=1[H])=O)(C([H])([H])[H])C([H])([H])[H]	Active
O([H])C(C1C([H])=C([H])C(C([H])=C([H])C(C2C([H])=C([H])C([H])=C([H])C=2[H])=O)=C([H])C=1[H])=O	Active
C([H])([H])([H])OC1C([H])=C([H])C(N2N=NC(C([H])([H])C([H])([H])OC([H])(C3C4C(=C([H])C([H])=C(C=4[H])OC([H])([H])[H])N=C([H])C=3[H])C3([H])N4C([H])([H])C([H])(C([H])(C([H])([H])C4([H])[H])C3([H])[H])C([H])=C([H])[H])=C2[H])=C([H])C=1[H]	Active
C([H])([H])([H])C1C2=C(C3C(=N2)C2C(=C([H])C([H])=C(C=2[H])Cl)N(C([H])([H])[H])C=3[H])C([H])=C(Br)C=1[H]	Active
C([H])([H])([H])C([H])([H])OC(C1C(=O)C2C(=C([H])C([H])=C(C=2[H])OC2C([H])=C([H])C([H])=C([H])C=2[H])N([H])C=1[H])=O	Active
C([H])([H])([H])C1C(C([H])([H])C2=NN=C(C3=C(OC4([H])C([H])([H])C([H])([H])N([H])C([H])([H])C4([H])[H])C4C(=C([H])C([H])=C([H])C=4[H])S3)O2)=C(C([H])([H])[H])N(C([H])([H])[H])N=1	Active
S=C(N([H])C([H])([H])C1C([H])=C([H])C([H])=C([H])C=1[H])N([H])C([H])([H])C([H])([H])C([H])([H])N([H])C([H])([H])C([H])([H])C([H])([H])C([H])([H])N([H])C([H])([H])C([H])([H])C([H])([H])N([H])C(N([H])C([H])([H])C1C([H])=C([H])C([H])=C([H])C=1[H])=S	Active
O=C(N([H])C([H])([H])C([H])([H])C([H])(C1C([H])=C([H])C([H])=C([H])C=1[H])C1C([H])=C([H])C([H])=C([H])C=1[H])N([H])C([H])([H])C([H])([H])C([H])([H])N([H])C([H])([H])C([H])([H])C([H])([H])N([H])C([H])([H])C([H])([H])C([H])([H])N([H])C(N([H])C([H])([H])C([H])([H])C([H])(C1C([H])=C([H])C([H])=C([H])C=1[H])C1C([H])=C([H])C([H])=C([H])C=1[H])=O	Active
C([H])([H])([H])C1C([H])=C([H])C(C([H])(C2N(C(C([H])([H])[H])(C([H])([H])[H])C([H])([H])[H])N=NN=2)N([H])C([H])([H])C([H])([H])N([H])C2C3C(=C([H])C(=C([H])C=3[H])Cl)N=C([H])C=2[H])=C([H])C=1[H]	Active
C([H])([H])([H])N1C2C([H])=NC3C(C=2N(C2C([H])=C(C(F)(F)F)C([H])=C([H])C=2[H])C1=O)=C([H])C(C1C([H])=NC(N([H])[H])=NC=1[H])=C([H])C=3[H]	Active
C([H])([H])([H])N1C2C([H])=NC3C(C=2N(C2C([H])=C(C(F)(F)F)C([H])=C([H])C=2[H])C1=O)=C([H])C(C1C([H])=C([H])C(C(N([H])[H])=O)=C([H])C=1[H])=C([H])C=3[H]	Active
C([H])([H])(C([H])([H])C([H])([H])C([H])([H])N([H])C1C2C(=C([H])C([H])=C([H])C=2[H])N=C2C=1C([H])([H])C([H])([H])C([H])([H])C2([H])[H])C([H])([H])C([H])([H])C([H])([H])N([H])C1C2C(=C([H])C([H])=C([H])C=2[H])N=C2C=1C([H])([H])C([H])([H])C([H])([H])C2([H])[H]	Active
C([H])([H])([H])N1C2C([H])=NC3C(C=2N(C2C([H])=C(C(F)(F)F)C([H])=C([H])C=2[H])C1=O)=C([H])C(C1C([H])=C(N([H])[H])C([H])=C([H])C=1[H])=C([H])C=3[H]	Active
C([H])([H])(C([H])([H])C([H])([H])N([H])C1C2C(=C([H])C([H])=C([H])C=2[H])N=C2C=1C([H])([H])C([H])([H])C([H])([H])C2([H])[H])C([H])([H])C([H])([H])C([H])([H])N([H])C1C2C(=C([H])C([H])=C([H])C=2[H])N=C2C=1C([H])([H])C([H])([H])C([H])([H])C2([H])[H]	Active
C([H])([H])(C([H])([H])C([H])([H])C([H])([H])C([H])([H])N([H])C1C2C(=C([H])C([H])=C([H])C=2[H])N=C2C=1C([H])([H])C([H])([H])C([H])([H])C2([H])[H])C([H])([H])C([H])([H])C([H])([H])C([H])([H])C([H])([H])N([H])C1C2C(=C([H])C([H])=C([H])C=2[H])N=C2C=1C([H])([H])C([H])([H])C([H])([H])C2([H])[H]	Active
C([H])([H])(C([H])([H])C([H])([H])C([H])([H])N([H])C1C2C(=C([H])C([H])=C([H])C=2[H])N=C2C=1C([H])([H])C([H])([H])C([H])([H])C2([H])[H])C([H])([H])C([H])([H])C([H])([H])C([H])([H])N([H])C1C2C(=C([H])C([H])=C([H])C=2[H])N=C2C=1C([H])([H])C([H])([H])C([H])([H])C2([H])[H]	Active
C([H])([H])([H])N([H])C(C([H])([H])C([H])([H])C([H])([H])C([H])([H])C([H])([H])C([H])(C1N([H])C(C2C([H])=C3C(C([H])=C([H])N=C3[H])=C([H])C=2[H])=C([H])N=1)N([H])C(C1SC([H])=NC=1[H])=O)=O	Active
N([H])([H])C1([H])C([H])([H])C([H])([H])C([H])(N([H])C2=NN3C(=NC([H])=C3C3C([H])=NC(N([H])C4N=C([H])C([H])=NC=4[H])=NC=3[H])C([H])=C2[H])C([H])([H])C1([H])[H]	Active
C([H])([H])([H])N([H])C(C([H])([H])C([H])([H])C([H])([H])C([H])([H])C([H])([H])C([H])(C1N([H])C(C2C([H])=C([H])C(C3N([H])N=C([H])C=3[H])=C([H])C=2[H])=C([H])N=1)N([H])C(C1SC([H])=NC=1[H])=O)=O	Active
C([H])([H])([H])OC1C([H])=C([H])C(C2(C(=O)N(C([H])([H])C3([H])C([H])([H])C([H])([H])OC([H])([H])C3([H])[H])C(=N[H])N2[H])C2C([H])=C([H])C(OC([H])([H])[H])=C([H])C=2[H])=C([H])C=1[H]	Active
C([H])([H])([H])C([H])([H])N1C(=O)C2(C([H])([H])C([H])([H])N(C([H])([H])C3C(O[H])=C([H])C([H])=C(Cl)C=3[H])C([H])([H])C2([H])[H])N(C([H])([H])C2C([H])=C([H])C(OC([H])([H])[H])=C([H])C=2[H])C1=O	Active
C([H])([H])(C([H])([H])C([H])([H])N([H])C1C2C(=C([H])C([H])=C([H])C=2[H])N=C2C=1C([H])([H])C([H])([H])C([H])([H])C2([H])[H])C([H])([H])C([H])([H])N([H])C1C2C(=C([H])C([H])=C([H])C=2[H])N=C2C=1C([H])([H])C([H])([H])C([H])([H])C2([H])[H]	Active
N([H])([H])C1([H])C([H])([H])C([H])([H])C([H])(N([H])C2=NN3C(=NC([H])=C3C3C([H])=NC(N([H])C4C([H])=NC([H])=C([H])C=4[H])=NC=3[H])C([H])=C2[H])C([H])([H])C1([H])[H]	Active
O([H])N([H])C(C([H])([H])C([H])([H])C([H])([H])C([H])([H])C([H])([H])ON([H])C(C1C(F)=C([H])C([H])=C([H])C=1[H])=O)=O	Active
N([H])([H])C([H])([H])C1C(O[H])=C([H])C([H])=C(N([H])C2C3C(=C([H])C(=C([H])C=3[H])Cl)N=C([H])C=2[H])C=1[H]	Active
O=C(N([H])C([H])([H])C([H])(C1C([H])=C([H])C([H])=C([H])C=1[H])C1C([H])=C([H])C([H])=C([H])C=1[H])N([H])C([H])([H])C([H])([H])C([H])([H])N([H])C([H])([H])C([H])([H])C([H])([H])C([H])([H])C([H])([H])N([H])C([H])([H])C([H])([H])C([H])([H])N([H])C(N([H])C([H])([H])C([H])(C1C([H])=C([H])C([H])=C([H])C=1[H])C1C([H])=C([H])C([H])=C([H])C=1[H])=O	Active
O=C(N([H])C([H])([H])C([H])([H])C([H])(C1C([H])=C([H])C([H])=C([H])C=1[H])C1C([H])=C([H])C([H])=C([H])C=1[H])N([H])C([H])([H])C([H])([H])C([H])([H])N([H])C([H])([H])C([H])([H])C([H])([H])C([H])([H])C([H])([H])N([H])C([H])([H])C([H])([H])C([H])([H])N([H])C(N([H])C([H])([H])C([H])([H])C([H])(C1C([H])=C([H])C([H])=C([H])C=1[H])C1C([H])=C([H])C([H])=C([H])C=1[H])=O	Active
O=C(N([H])C([H])(C1C([H])=C([H])C([H])=C([H])C=1[H])C1C([H])=C([H])C([H])=C([H])C=1[H])N([H])C([H])([H])C([H])([H])C([H])([H])N([H])C([H])([H])C([H])([H])C([H])([H])C([H])([H])C([H])([H])N([H])C([H])([H])C([H])([H])C([H])([H])N([H])C(N([H])C([H])(C1C([H])=C([H])C([H])=C([H])C=1[H])C1C([H])=C([H])C([H])=C([H])C=1[H])=O	Active
C([H])([H])([H])C(C(N([H])C([H])(C1C([H])=C([H])C(C2C([H])=C([H])C([H])=C([H])C=2[H])=C([H])C=1[H])C(N([H])O[H])=O)=O)(C([H])([H])[H])C([H])([H])[H]	Active
O=C(N([H])C([H])([H])C([H])(C1C([H])=C([H])C([H])=C([H])C=1[H])C1C([H])=C([H])C([H])=C([H])C=1[H])N([H])C([H])([H])C([H])([H])C([H])([H])N([H])C([H])([H])C([H])([H])C([H])([H])C([H])([H])C([H])([H])C([H])([H])C([H])([H])N([H])C([H])([H])C([H])([H])C([H])([H])N([H])C(N([H])C([H])([H])C([H])(C1C([H])=C([H])C([H])=C([H])C=1[H])C1C([H])=C([H])C([H])=C([H])C=1[H])=O	Active
O=C(N([H])C([H])([H])C([H])([H])C([H])(C1C([H])=C([H])C([H])=C([H])C=1[H])C1C([H])=C([H])C([H])=C([H])C=1[H])N([H])C([H])([H])C([H])([H])C([H])([H])N([H])C([H])([H])C([H])([H])C([H])([H])C([H])([H])C([H])([H])C([H])([H])C([H])([H])N([H])C([H])([H])C([H])([H])C([H])([H])N([H])C(N([H])C([H])([H])C([H])([H])C([H])(C1C([H])=C([H])C([H])=C([H])C=1[H])C1C([H])=C([H])C([H])=C([H])C=1[H])=O	Active
C([H])([H])([H])OC1C([H])=C2C(C(C(C([H])([H])[H])=C(C3N=C(C4C([H])=C([H])C(OC(F)(F)F)=C([H])C=4[H])C([H])=C([H])C=3[H])N2[H])=O)=C([H])C=1[H]	Active
C([H])([H])([H])C([H])(C1=C(C(N([H])C([H])([H])C([H])([H])N2C([H])([H])C([H])([H])OC([H])([H])C2([H])[H])=O)N=C(N([H])C(C2N(C([H])([H])[H])C([H])=C(N([H])C(C3N(C([H])([H])[H])C([H])=C(N([H])C(C4N=C([H])C5C(=C([H])C([H])=C([H])C=5[H])C=4[H])=O)C=3[H])=O)C=2[H])=O)S1)C([H])([H])[H]	Active
C([H])([H])([H])N(C(C1N=C([H])C(OC2C([H])=C3C(C([H])([H])OB3O[H])=C([H])C=2[H])=NC=1[H])=O)C([H])([H])[H]	Active
C([H])([H])([H])C1C([H])=C([H])C(C([H])=C([H])C(C2C(=O)OC3C(=C([H])C([H])=C([H])C=3[H])C=2O[H])=O)=C([H])C=1[H]	Active
C([H])([H])([H])N(C1C([H])=C([H])C(C([H])=C([H])C(C2C(=O)OC3C(=C([H])C([H])=C([H])C=3[H])C=2O[H])=O)=C([H])C=1[H])C([H])([H])[H]	Active
C([H])([H])([H])N1C2C([H])=NC3C(C=2N(C2C([H])=C(C(F)(F)F)C([H])=C([H])C=2[H])C1=O)=C([H])C(C1C([H])=NC(N([H])[H])=C([H])C=1[H])=C([H])C=3[H]	Active
N([H])([H])C(C([H])([H])C([H])(C1C2C(=C([H])C([H])=C([H])C=2[H])C2C(=C([H])C([H])=C([H])C=2[H])C=1[H])O[H])=NN=C([H])C1C([H])=C([H])C([H])=C([H])C=1[H]	Active
C([H])([H])([H])C([H])(N(C(N1N=C(S(C2([H])C([H])([H])C([H])([H])C([H])([H])C([H])([H])C2([H])[H])(=O)=O)N=C1[H])=O)C([H])([H])[H])C([H])([H])[H]	Active
O([H])N([H])C(C([H])([H])C([H])([H])C([H])(P(O[H])(O[H])=O)C1C([H])=C(F)C(F)=C([H])C=1[H])=O	Active
C([H])([H])([H])N1C2C([H])=NC3C(C=2N(C2C([H])=C(C(F)(F)F)C([H])=C([H])C=2[H])C1=O)=C([H])C(C1C([H])=C([H])C(N([H])[H])=C([H])C=1[H])=C([H])C=3[H]	Active
C([H])([H])([H])N(C(C([H])([H])C([H])([H])C([H])(P(OC([H])([H])OC(OC(C([H])([H])[H])(C([H])([H])[H])C([H])([H])[H])=O)(OC([H])([H])OC(OC(C([H])([H])[H])(C([H])([H])[H])C([H])([H])[H])=O)=O)C1C([H])=C(F)C(F)=C([H])C=1[H])=O)OC(C([H])([H])[H])=O	Active
C([H])([H])([H])N1C2C([H])=NC3C(C=2N(C2C([H])=C(C(F)(F)F)C([H])=C([H])C=2[H])C1=O)=C([H])C(C1C([H])=C([H])C(O[H])=C([H])C=1[H])=C([H])C=3[H]	Active
C([H])([H])([H])N(C(C([H])([H])C([H])([H])C([H])(P(O[H])(O[H])=O)C1C([H])=C(F)C(F)=C([H])C=1[H])=O)O[H]	Active
C([H])([H])(C([H])([H])N([H])C1C2C(=C([H])C([H])=C([H])C=2[H])N=C2C=1C([H])([H])C([H])([H])C([H])([H])C2([H])[H])C([H])([H])C([H])([H])N([H])C1C2C(=C([H])C([H])=C([H])C=2[H])N=C2C=1C([H])([H])C([H])([H])C([H])([H])C2([H])[H]	Active
N([H])([H])C1([H])C([H])([H])C([H])([H])C([H])(N([H])C2=NN3C(=NC([H])=C3C3C([H])=NC(N([H])C4C([H])=C([H])C([H])=C([H])C=4[H])=NC=3[H])C([H])=C2[H])C([H])([H])C1([H])[H]	Active
C([H])([H])([H])C1C([H])=C([H])C(C([H])=NN=C(C([H])([H])C([H])(C2C3C(=C([H])C([H])=C([H])C=3[H])C([H])=C([H])C=2[H])O[H])N([H])[H])=C([H])C=1[H]	Active
FC(C1C([H])=C(N2C3C(=C([H])N=C4C=3C([H])=C(C3C([H])=C5C(N([H])C([H])=N5)=C([H])C=3[H])C([H])=C4[H])N([H])C2=O)C([H])=C([H])C=1[H])(F)F	Active
C([H])([H])([H])C([H])([H])N1C(=O)C2(C([H])([H])C([H])([H])N(C([H])([H])C3C(O[H])=C([H])C([H])=C(Cl)C=3[H])C([H])([H])C2([H])[H])N(C([H])([H])C2C([H])=C([H])C(C(F)(F)F)=C([H])C=2[H])C1=O	Active
C([H])([H])([H])OC1C(OC([H])([H])[H])=C([H])C(C([H])(P(O[H])(O[H])=O)C([H])([H])C([H])([H])C(N(O[H])C([H])([H])[H])=O)=C([H])C=1[H]	Active
N([H])=C1N(C2([H])C([H])([H])C([H])([H])C([H])([H])C([H])([H])C2([H])[H])C(=O)C(C2C([H])=C(OC3C([H])=C([H])C([H])=C([H])C=3[H])C([H])=C([H])C=2[H])(C2C([H])=C([H])C([H])=C([H])C=2[H])N1[H]	Active
C([H])([H])([H])OC1C([H])=C([H])C(C2(C(=O)N(C3([H])C([H])([H])C([H])([H])N(C(OC(C([H])([H])[H])(C([H])([H])[H])C([H])([H])[H])=O)C([H])([H])C3([H])[H])C(=N[H])N2[H])C2C([H])=C([H])C(OC([H])([H])[H])=C([H])C=2[H])=C([H])C=1[H]	Active
C([H])([H])([H])C([H])([H])N1C(=O)C2(C([H])([H])C([H])([H])N(C([H])([H])C3C(O[H])=C([H])C([H])=C(OC([H])([H])[H])C=3[H])C([H])([H])C2([H])[H])N(C([H])([H])C([H])([H])C([H])(C([H])([H])[H])C([H])([H])[H])C1=O	Active
C([H])([H])([H])N([H])C(C([H])([H])C([H])([H])C([H])([H])C([H])([H])C([H])([H])C([H])(C1N([H])C(C2C([H])=C([H])C(C3N=C([H])SC=3[H])=C([H])C=2[H])=C([H])N=1)N([H])C(C1SC([H])=NC=1[H])=O)=O	Active
C([H])([H])([H])N1C2C([H])=NC3C(C=2N(C2C([H])=C(C(F)(F)F)C([H])=C([H])C=2[H])C1=O)=C([H])C(C1C([H])=C([H])C(S(C([H])([H])[H])(=O)=O)=C([H])C=1[H])=C([H])C=3[H]	Active
C([H])([H])([H])OC1C([H])=C([H])C(C2(C(=O)N(C3([H])C([H])([H])C([H])([H])N(C([H])([H])[H])C([H])([H])C3([H])[H])C(=N[H])N2[H])C2C([H])=C([H])C(OC([H])([H])[H])=C([H])C=2[H])=C([H])C=1[H]	Active
O([H])C1C([H])=C(C2C([H])=C([H])C([H])=C([H])C=2[H])OC(=O)C=1C(N([H])C1C([H])=C([H])C(Br)=C([H])C=1[H])=O	Active
C([H])([H])([H])C([H])([H])N1C(=O)C2(C([H])([H])C([H])([H])N(C([H])([H])C3C([H])=C(Cl)C([H])=C(O[H])C=3[H])C([H])([H])C2([H])[H])N(C([H])([H])C([H])([H])C([H])(C([H])([H])[H])C([H])([H])[H])C1=O	Active
C([H])([H])([H])OC(C1N=C([H])C(OC2C([H])=C3C(C([H])([H])OB3O[H])=C([H])C=2[H])=NC=1[H])=O	Active
C([H])([H])([H])C([H])([H])OC(C1N=C([H])C(OC2C([H])=C3C(C([H])([H])OB3O[H])=C([H])C=2[H])=NC=1[H])=O	Active
C([H])([H])([H])OC1C([H])=C2C(C(C(C([H])([H])[H])=C(C3C([H])=C(C4C([H])=C([H])C(OC(F)(F)F)=C([H])C=4[H])C([H])=NC=3[H])N2[H])=O)=C([H])C=1[H]	Active
C([H])([H])([H])C(C(N([H])C([H])(C1C([H])=C([H])C(C2C([H])=C(F)C(F)=C(F)C=2[H])=C([H])C=1[H])C(N([H])O[H])=O)=O)(C([H])([H])[H])C([H])([H])[H]	Active
C([H])([H])([H])C(C(N([H])C([H])(C1C([H])=C([H])C(C2C(F)=C(F)C(F)=C(F)C=2F)=C([H])C=1[H])C(N([H])O[H])=O)=O)(C([H])([H])[H])C([H])([H])[H]	Active
C([H])([H])([H])C1C(=O)C2C(=C([H])C([H])=C(C=2[H])O[H])N([H])C=1C1C([H])=NC(C2C([H])=C([H])C(OC(F)(F)F)=C([H])C=2[H])=C([H])C=1[H]	Active
C([H])([H])([H])C1C(=O)C2C(=C([H])C([H])=C([H])C=2[H])N([H])C=1C1N=C(C2C([H])=C([H])C(OC(F)(F)F)=C([H])C=2[H])C([H])=C([H])C=1[H]	Active
O=C(N([H])C([H])([H])C([H])(C1C([H])=C([H])C([H])=C([H])C=1[H])C1C([H])=C([H])C([H])=C([H])C=1[H])N([H])C([H])([H])C([H])([H])C([H])([H])N([H])C([H])([H])C([H])([H])C([H])([H])C([H])([H])N([H])C([H])([H])C([H])([H])C([H])([H])N([H])C(N([H])C([H])([H])C([H])(C1C([H])=C([H])C([H])=C([H])C=1[H])C1C([H])=C([H])C([H])=C([H])C=1[H])=O	Active
O=C(N([H])C([H])([H])C([H])([H])C([H])(C1C([H])=C([H])C([H])=C([H])C=1[H])C1C([H])=C([H])C([H])=C([H])C=1[H])N([H])C([H])([H])C([H])([H])C([H])([H])N([H])C([H])([H])C([H])([H])C([H])([H])C([H])([H])N([H])C([H])([H])C([H])([H])C([H])([H])N([H])C(N([H])C([H])([H])C([H])([H])C([H])(C1C([H])=C([H])C([H])=C([H])C=1[H])C1C([H])=C([H])C([H])=C([H])C=1[H])=O	Active
O=C(N([H])C([H])(C1C([H])=C([H])C([H])=C([H])C=1[H])C1C([H])=C([H])C([H])=C([H])C=1[H])N([H])C([H])([H])C([H])([H])C([H])([H])N([H])C([H])([H])C([H])([H])C([H])([H])C([H])([H])N([H])C([H])([H])C([H])([H])C([H])([H])N([H])C(N([H])C([H])(C1C([H])=C([H])C([H])=C([H])C=1[H])C1C([H])=C([H])C([H])=C([H])C=1[H])=O	Active
C([H])([H])([H])OC1C([H])=C([H])C(C2=C([H])C([H])=C(C3C([H])=C([H])C(C(N([H])[H])=N[H])=C([H])C=3[H])O2)=C([H])C=1[H]	Active
C([H])([H])([H])C1([H])C2([H])C3([H])C(C([H])(C([H])([H])C2([H])[H])C([H])([H])[H])(N=C=[Se])C([H])([H])C([H])([H])C(C3([H])C([H])(C([H])([H])C(N=C=[Se])(C([H])([H])[H])C([H])([H])[H])C1([H])[H])=C([H])[H]	Active
C([H])([H])([H])N1C2C([H])=NC3C(C=2N(C2C([H])=C(C(F)(F)F)C([H])=C([H])C=2[H])C1=O)=C([H])C(C1C([H])=NC(C([H])([H])[H])=C([H])C=1[H])=C([H])C=3[H]	Active
C([H])([H])([H])OC1C([H])=C(OC([H])([H])[H])C(C([H])([H])N(C(N2N=C(S(C3([H])C4([H])C([H])([H])C([H])(C([H])([H])C4([H])[H])C3([H])[H])(=O)=O)N=C2[H])=O)C([H])([H])[H])=C([H])C=1[H]	Active
N([H])([H])C1([H])C([H])([H])C([H])([H])C([H])(N([H])C2=NN3C(=NC([H])=C3C3C([H])=NC(N([H])C4N=C([H])C([H])=C([H])C=4[H])=NC=3[H])C([H])=C2[H])C([H])([H])C1([H])[H]	Active
C([H])([H])([H])C1C([H])=C(C(N([H])OC([H])([H])C([H])([H])C([H])([H])C([H])([H])C([H])([H])C(N([H])O[H])=O)=O)C([H])=C(C([H])([H])[H])C=1[H]	Active
C([H])([H])([H])OC1C([H])=C([H])C(C([H])(P(O[H])(O[H])=O)C([H])([H])C([H])([H])C(N(O[H])C([H])([H])[H])=O)=C([H])C=1[H]	Active
O([H])N([H])C(C([H])([H])C([H])([H])C([H])([H])C([H])([H])C([H])([H])ON([H])C(C1C([H])=C([H])C(C2C([H])=C([H])C([H])=C([H])C=2[H])=C([H])C=1[H])=O)=O	Active
C([H])([H])([H])C1N=C([H])C(C2C([H])=C3C(N=C([H])C4=C3N(C3C([H])=C(C(F)(F)F)C([H])=C([H])C=3[H])C(=O)N4[H])=C([H])C=2[H])=C([H])C=1[H]	Active
N([H])([H])C1N=C([H])C(C2C([H])=C3C(N=C([H])C4=C3N(C3C([H])=C(C(F)(F)F)C([H])=C([H])C=3[H])C(=O)N4[H])=C([H])C=2[H])=C([H])N=1	Active
C([H])([H])([H])N(C(N1N=C(S(C2([H])C3([H])C([H])([H])C([H])(C([H])([H])C3([H])[H])C2([H])[H])(=O)=O)N=C1[H])=O)C([H])([H])C1C([H])=C([H])C(S(C([H])([H])[H])(=O)=O)=C([H])C=1[H]	Active
C([H])([H])(N([H])C1C2C(=C([H])C([H])=C([H])C=2[H])N=C2C=1C([H])([H])C([H])([H])C([H])([H])C2([H])[H])C([H])([H])N([H])C1C2C(=C([H])C([H])=C([H])C=2[H])N=C2C=1C([H])([H])C([H])([H])C([H])([H])C2([H])[H]	Active
O([H])N=C1C2C(=C([H])C([H])=C([H])C=2[H])C2C3C(N=C(C1=2)N([H])C([H])([H])C([H])([H])N1C([H])([H])C([H])([H])C([H])([H])C([H])([H])C1([H])[H])=C([H])C(Cl)=C([H])C=3[H]	Active
C([H])([H])([H])C1C([H])=C([H])C(C([H])=NN=C(C([H])([H])C([H])(C2C([H])=C3C(C([H])=C([H])C([H])=C3[H])=C([H])C=2[H])O[H])N([H])[H])=C([H])C=1[H]	Active
N([H])=C1N(C2([H])C([H])([H])C([H])([H])C([H])([H])C([H])([H])C2([H])[H])C(=O)C(C2C([H])=C(C3C([H])=NC([H])=C([H])C=3[H])C([H])=C([H])C=2[H])(C2C([H])=C(C3C([H])=NC([H])=C([H])C=3[H])C([H])=C([H])C=2[H])N1[H]	Active
C([H])([H])([H])N1C([H])([H])C([H])([H])N(C([H])([H])C([H])([H])N([H])C2C3=C(C4C(C3=NO[H])=C([H])C([H])=C([H])C=4[H])C3C(=C([H])C([H])=C(C=3[H])Cl)N=2)C([H])([H])C1([H])[H]	Active
O([H])N=C1C2C(=C([H])C([H])=C([H])C=2[H])C2C3C(N=C(C1=2)N([H])C([H])([H])C([H])([H])N1C([H])([H])C([H])([H])C([H])([H])C([H])([H])C1([H])[H])=C([H])C([H])=C(Cl)C=3[H]	Active
C([H])([H])([H])N1C2C(=C([H])C(=C([H])C=2[H])Cl)C2C(C3C(N=2)=C2C(C([H])=C([H])C([H])=C2[H])=C([H])C=3[H])=C1[H]	Active
O([H])C1C2C(=C([H])C([H])=C([H])C=2[H])OC(=O)C=1C(C([H])=C([H])C1C([H])=C([H])C([H])=C([H])C=1[H])=O	Active
C([H])([H])([H])N1C2C([H])=NC3C(C=2N(C2C([H])=C(C(F)(F)F)C([H])=C([H])C=2[H])C1=O)=C([H])C(C1C([H])=C([H])N=C([H])C=1[H])=C([H])C=3[H]	Active
N([H])([H])C(C([H])([H])C([H])(C1C2C(=C([H])C([H])=C([H])C=2[H])C([H])=C([H])C=1[H])O[H])=NN=C([H])C1C([H])=C([H])C([H])=C([H])C=1[H]	Active
C([H])([H])([H])N1C([H])([H])C([H])([H])N(C([H])([H])C([H])([H])N([H])C2=NN3C(=NC([H])=C3C3C([H])=NC(N([H])C4C(F)=C([H])C([H])=C([H])N=4)=NC=3[H])C([H])=C2[H])C([H])([H])C1([H])[H]	Active
N([H])([H])C1C([H])=C(C2C([H])=C3C(N=C([H])C4=C3N(C3C([H])=C(C(F)(F)F)C([H])=C([H])C=3[H])C(=O)N4[H])=C([H])C=2[H])C([H])=C([H])C=1[H]	Active
C([H])([H])([H])C([H])([H])N1C(=O)C2(C([H])([H])C([H])([H])N(C([H])([H])C3C(Cl)=C(Cl)C([H])=C([H])C=3O[H])C([H])([H])C2([H])[H])N(C([H])([H])C([H])([H])C([H])(C([H])([H])[H])C([H])([H])[H])C1=O	Active
C([H])([H])([H])OC1C([H])=C(C2(C(=O)N(C3([H])C([H])([H])C([H])([H])C([H])([H])C([H])([H])C3([H])[H])C(=N[H])N2[H])C2C([H])=C(C3C([H])=C([H])N=C([H])C=3[H])C([H])=C([H])C=2[H])C([H])=C([H])C=1[H]	Active
C([H])([H])([H])C([H])([H])N1C(=O)C2(C([H])([H])C([H])([H])N(C([H])([H])C3C(Cl)=C([H])C([H])=C([H])C=3O[H])C([H])([H])C2([H])[H])N(C([H])([H])C([H])([H])C([H])(C([H])([H])[H])C([H])([H])[H])C1=O	Active
C([H])([H])([H])C([H])([H])N1C(=O)C2(C([H])([H])C([H])([H])N(C([H])([H])C3C(O[H])=C(Cl)C([H])=C(Cl)C=3[H])C([H])([H])C2([H])[H])N(C([H])([H])C([H])([H])C([H])(C([H])([H])[H])C([H])([H])[H])C1=O	Active
C([H])([H])([H])C([H])([H])N1C(=O)C2(C([H])([H])C([H])([H])N(C([H])([H])C3C(O[H])=C([H])C(OC([H])([H])[H])=C([H])C=3[H])C([H])([H])C2([H])[H])N(C([H])([H])C([H])([H])C([H])(C([H])([H])[H])C([H])([H])[H])C1=O	Active
N([H])([H])S(C1C([H])=C([H])C(C2C([H])=C3C(N=C([H])C4=C3N(C3C([H])=C(C(F)(F)F)C([H])=C([H])C=3[H])C(=O)N4[H])=C([H])C=2[H])=C([H])C=1[H])(=O)=O	Active
C([H])([H])([H])OC1C([H])=C2C(N=C(C([H])=C2C([H])(C2([H])N3C([H])([H])C([H])(C([H])(C([H])([H])C3([H])[H])C2([H])[H])C([H])=C([H])[H])O[H])C([H])([H])C([H])([H])C([H])(C2([H])C3(C([H])(C4([H])C([H])(C([H])([H])C3([H])[H])C3(C([H])(C([H])([H])C([H])(C([H])([H])C3([H])[H])O[H])C([H])(O[H])C4([H])[H])C([H])([H])[H])C([H])([H])C2([H])[H])C([H])([H])[H])C([H])([H])[H])=C([H])C=1[H]	Active
C([H])([H])([H])C(C(N([H])C([H])(C1C([H])=C([H])C(C2C(F)=C([H])C([H])=C([H])C=2[H])=C([H])C=1[H])C(N([H])O[H])=O)=O)(C([H])([H])[H])C([H])([H])[H]	Active
C([H])([H])([H])C(C(N([H])C([H])(C1C([H])=C([H])C(C2C([H])=C(F)C(F)=C([H])C=2[H])=C([H])C=1[H])C(N([H])O[H])=O)=O)(C([H])([H])[H])C([H])([H])[H]	Active
C([H])([H])([H])C(C(N([H])C([H])(C1C([H])=C([H])C(C2C([H])=C(F)C([H])=C(F)C=2[H])=C([H])C=1[H])C(N([H])O[H])=O)=O)(C([H])([H])[H])C([H])([H])[H]	Active
C([H])([H])([H])OC1C([H])=C2C(N=C(C([H])=C2C([H])(C2([H])N3C([H])([H])C([H])(C([H])(C([H])([H])C3([H])[H])C2([H])[H])C([H])=C([H])[H])O[H])C([H])([H])C([H])([H])C([H])(C2([H])C3(C([H])(C4([H])C([H])(C([H])([H])C3([H])[H])C3(C([H])(C([H])([H])C([H])(C([H])([H])C3([H])[H])O[H])C([H])(O[H])C4([H])O[H])C([H])([H])[H])C([H])([H])C2([H])[H])C([H])([H])[H])C([H])([H])[H])=C([H])C=1[H]	Active
C([H])([H])([H])C([H])(C1([H])C2(C([H])(C3([H])C([H])(C([H])([H])C2([H])[H])C2(C([H])(C([H])([H])C([H])(C([H])([H])C2([H])[H])O[H])C([H])(O[H])C3([H])O[H])C([H])([H])[H])C([H])([H])C1([H])[H])C([H])([H])[H])C([H])([H])C([H])([H])C1N=C2C(C([H])=C([H])C([H])=C2[H])=C(C([H])(C2([H])N3C([H])([H])C([H])(C([H])(C([H])([H])C3([H])[H])C2([H])[H])C([H])=C([H])[H])O[H])C=1[H]	Active
C([H])([H])([H])C1C(=O)C2C(=C([H])C(=C([H])C=2[H])O[H])N([H])C=1C1C([H])=NC(C2C([H])=C([H])C(OC(F)(F)F)=C([H])C=2[H])=C([H])C=1[H]	Active
C([H])([H])([H])N1C2C(=C([H])C([H])=C([H])C=2[H])C2C(C3C(N=2)=C([H])C([H])=C([H])C=3[H])=C1[H]	Active
C([H])([H])([H])C([H])(N(C(N1N=C(S(C2([H])C3([H])C([H])([H])C4([H])C([H])([H])C([H])(C([H])([H])C2([H])C4([H])[H])C3([H])[H])(=O)=O)N=C1[H])=O)C([H])([H])[H])C([H])([H])[H]	Active
C([H])([H])([H])OC1C([H])=C(C([H])([H])N(C(N2N=C(S(C3([H])C4([H])C([H])([H])C([H])(C([H])([H])C4([H])[H])C3([H])[H])(=O)=O)N=C2[H])=O)C([H])([H])[H])C([H])=C([H])C=1[H]	Active
O=C(N1N=C(S(C2([H])C3([H])C([H])([H])C([H])(C([H])([H])C3([H])[H])C2([H])[H])(=O)=O)N=C1[H])N1C([H])([H])C([H])([H])C([H])([H])C1([H])[H]	Active
N([H])([H])C(C([H])([H])C([H])(C1C2C(=C([H])C([H])=C([H])C=2[H])C([H])=C([H])C=1[H])O[H])=NN=C([H])C1C([H])=C(Br)C([H])=C([H])C=1[H]	Active
C([H])([H])([H])N1C2C([H])=NC3C(C=2N(C2C([H])=C(C(F)(F)F)C([H])=C([H])C=2[H])C1=O)=C([H])C(C1C([H])=NC([H])=C([H])C=1[H])=C([H])C=3[H]	Active
C([H])([H])([H])C1C([H])=C(C(N([H])OC([H])([H])C([H])([H])C([H])([H])C([H])([H])C([H])([H])C(N([H])O[H])=O)=O)C([H])=C([H])C=1[H]	Active
N([H])([H])C1C([H])=C([H])C(C2C([H])=C3C(N=C([H])C4=C3N(C3C([H])=C(C(F)(F)F)C([H])=C([H])C=3[H])C(=O)N4[H])=C([H])C=2[H])=C([H])C=1[H]	Active
C([H])([H])([H])C([H])([H])N1C(=O)C2(C([H])([H])C([H])([H])N(C([H])([H])C3C(O[H])=C([H])C([H])=C(C4C([H])=C([H])C([H])=C([H])C=4[H])C=3[H])C([H])([H])C2([H])[H])N(C([H])([H])C([H])([H])C([H])(C([H])([H])[H])C([H])([H])[H])C1=O	Active
C([H])([H])([H])C(C1C([H])=C2C(S([H])(C([H])([H])C3([H])C2([H])OC([H])(C([H])([H])OC([H])([H])C2C([H])=C([H])C([H])=C([H])C=2[H])C([H])(OC([H])([H])C2C([H])=C([H])C([H])=C([H])C=2[H])C3([H])OC([H])([H])C2C([H])=C([H])C([H])=C([H])C=2[H])O[H])=C([H])C=1[H])(C([H])([H])[H])C([H])([H])[H]	Active
C([H])([H])([H])OC1C([H])=C([H])C(C2(C(=O)N(C([H])([H])C3([H])C([H])([H])C([H])([H])C([H])([H])C([H])([H])C3([H])[H])C(=N[H])N2[H])C2C([H])=C([H])C(OC([H])([H])[H])=C([H])C=2[H])=C([H])C=1[H]	Active
C([H])([H])([H])C(C1C([H])=C2C3([H])C([H])(C([H])([H])S(C2=C([H])C=1[H])(=O)=O)C([H])(OC([H])([H])C1C([H])=C([H])C([H])=C([H])C=1[H])C([H])(OC([H])([H])C1C([H])=C([H])C([H])=C([H])C=1[H])C([H])(C([H])([H])OC([H])([H])C1C([H])=C([H])C([H])=C([H])C=1[H])O3)(C([H])([H])[H])C([H])([H])[H]	Active
C([H])([H])([H])C([H])([H])N1C(=O)C2(C([H])([H])C([H])([H])N(C([H])([H])C3C(O[H])=C([H])C([H])=C(Cl)C=3[H])C([H])([H])C2([H])[H])N(C2([H])C([H])([H])C([H])([H])C([H])([H])C2([H])[H])C1=O	Active
C([H])([H])([H])C([H])([H])N1C(=O)C2(C([H])([H])C([H])([H])N(C([H])([H])C3C(O[H])=C([H])C([H])=C(Cl)C=3[H])C([H])([H])C2([H])[H])N(C([H])([H])C2C([H])=C([H])C([H])=C([H])C=2[H])C1=O	Active
O=C(N1N=C(S(C2([H])C3([H])C([H])([H])C([H])(C([H])([H])C3([H])[H])C2([H])[H])(=O)=O)N=C1[H])N1C([H])([H])C([H])([H])C([H])([H])C([H])([H])C1([H])[H]	Active
C([H])([H])([H])OC1C([H])=C([H])C(C2(C(=O)N(C([H])([H])C3C([H])=C([H])C([H])=C([H])C=3[H])C(=N[H])N2[H])C2C([H])=C([H])C(OC([H])([H])[H])=C([H])C=2[H])=C([H])C=1[H]	Active
C([H])([H])([H])N1C2C(=C([H])C([H])=C(C=2[H])F)C2C(C3C(N=2)=C([H])C([H])=C(Br)C=3[H])=C1[H]	Active
C([H])([H])([H])C1C(=O)C2C(=C([H])C([H])=C([H])C=2[H])N([H])C=1C1C([H])=NC(C2C([H])=C([H])C(OC(F)(F)F)=C([H])C=2[H])=C([H])C=1[H]	Active
C([H])([H])([H])C(C(N([H])C([H])(C1C([H])=C([H])C(C2C(F)=C([H])C(F)=C([H])C=2F)=C([H])C=1[H])C(N([H])O[H])=O)=O)(C([H])([H])[H])C([H])([H])[H]	Active
C([H])([H])([H])OC1C([H])=C2C(C(C(C([H])([H])[H])=C(C3N=C([H])C([H])=C(C4C([H])=C([H])C(OC(F)(F)F)=C([H])C=4[H])C=3[H])N2[H])=O)=C([H])C=1[H]	Active
C([H])([H])([H])C(C(N([H])C([H])(C1C([H])=C([H])C(C2C([H])=C(F)C([H])=C([H])C=2[H])=C([H])C=1[H])C(N([H])O[H])=O)=O)(C([H])([H])[H])C([H])([H])[H]	Active
C([H])([H])([H])OC1C([H])=C2C(N=C([H])C([H])=C2C([H])(C2([H])N3C([H])([H])C([H])(C([H])(C([H])([H])C3([H])[H])C2([H])[H])C([H])=C([H])[H])OC([H])([H])C2N=NN(C3C([H])=C([H])C(Cl)=C([H])C=3[H])C=2[H])=C([H])C=1[H]	Active
O([H])C1C2C(=C([H])C([H])=C([H])C=2[H])OC(=O)C=1C(C([H])=C([H])C1C([H])=C(Cl)C([H])=C([H])C=1[H])=O	Active
C([H])([H])([H])OC1C([H])=C([H])C(C([H])=C([H])C(C2C(=O)OC3C(=C([H])C([H])=C([H])C=3[H])C=2O[H])=O)=C([H])C=1[H]	Active
N([H])([H])C(C([H])([H])C([H])(C1C2C(=C([H])C([H])=C([H])C=2[H])C2C(=C([H])C([H])=C([H])C=2[H])C=1[H])O[H])=NN=C([H])C1C([H])=C([H])C(F)=C([H])C=1[H]	Active
N([H])([H])C(C([H])([H])C([H])(C1C2C(=C([H])C([H])=C([H])C=2[H])C([H])=C([H])C=1[H])O[H])=NN=C([H])C1C([H])=C([H])C(F)=C([H])C=1[H]	Active
C([H])([H])([H])C([H])(N(C(N1N=C(SC2([H])C3([H])C([H])([H])C([H])(C([H])([H])C3([H])[H])C2([H])[H])N=C1[H])=O)C([H])([H])[H])C([H])([H])[H]	Active
N([H])([H])C(C([H])([H])C([H])(C1C2C(=C([H])C([H])=C([H])C=2[H])C([H])=C([H])C=1[H])O[H])=NN=C([H])C1C([H])=C([H])C(C(F)(F)F)=C([H])C=1[H]	Active
C([H])([H])([H])C([H])(C([H])([H])C([H])([H])N1C2(C([H])([H])C([H])([H])N(C([H])([H])C3C(O[H])=C([H])C([H])=C(Cl)C=3[H])C([H])([H])C2([H])[H])C(=O)N(C([H])(C([H])([H])[H])C([H])([H])[H])C1=O)C([H])([H])[H]	Active
C([H])([H])([H])C([H])([H])C([H])([H])N(C(N1N=C(S(C2([H])C3([H])C([H])([H])C([H])(C([H])([H])C3([H])[H])C2([H])[H])(=O)=O)N=C1[H])=O)C([H])([H])[H]	Active
N([H])([H])C(C([H])([H])C([H])(C1C2C(=C([H])C([H])=C([H])C=2[H])C([H])=C([H])C=1[H])O[H])=NN=C([H])C1C([H])=C(F)C(F)=C([H])C=1[H]	Active
C([H])([H])([H])C1([H])C2([H])C3([H])C(C([H])(C([H])([H])C2([H])[H])C([H])([H])[H])(N=C=S)C([H])([H])C([H])([H])C(C3([H])C([H])(C([H])([H])C(C([H])([H])[H])=C([H])[H])C1([H])[H])=C([H])[H]	Active
C([H])([H])([H])N(C(C([H])([H])C([H])([H])C([H])(P(O[H])(O[H])=O)C1C([H])=C([H])C(C([H])([H])[H])=C([H])C=1[H])=O)O[H]	Active
C([H])([H])([H])C([H])([H])OC1C(O[H])=C([H])C([H])=C(C([H])=NN=C(C([H])([H])C([H])(C2C3C(=C([H])C([H])=C([H])C=3[H])C([H])=C([H])C=2[H])O[H])N([H])[H])C=1[H]	Active
N([H])([H])C(C([H])([H])C([H])(C1C2C(=C([H])C([H])=C([H])C=2[H])C([H])=C([H])C=1[H])O[H])=NN=C([H])C1C([H])=C(Cl)C(Cl)=C([H])C=1[H]	Active
N([H])([H])C(C([H])([H])C([H])(C1C2C(=C([H])C([H])=C([H])C=2[H])C([H])=C([H])C=1[H])O[H])=NN=C([H])C1=C([H])C([H])=C([H])O1	Active
C([H])([H])([H])C([H])(N(C(N1N=C(SC2([H])C3([H])C([H])([H])C([H])(C([H])([H])C3([H])[H])C2([H])[H])N=C1[H])=O)C([H])(C([H])([H])[H])C([H])([H])[H])C([H])([H])[H]	Active
C([H])([H])([H])C([H])([H])N(C(N1N=C(S(C2([H])C3([H])C([H])([H])C([H])(C([H])([H])C3([H])[H])C2([H])[H])(=O)=O)N=C1[H])=O)C([H])([H])C([H])([H])[H]	Active
C([H])([H])([H])OC1C([H])=C2C(C(C(C([H])([H])[H])=C(C3C([H])=NC(C4C([H])=C([H])C(OC(F)(F)F)=C([H])C=4[H])=C([H])C=3[H])N2[H])=O)=C([H])C=1[H]	Active
O=C(C1C(=O)C2C(=C([H])C(=C([H])C=2[H])OC2C([H])=C([H])C([H])=C([H])C=2[H])N([H])C=1[H])OC1([H])C([H])([H])C([H])([H])C([H])([H])C([H])([H])C1([H])[H]	Active
C([H])([H])([H])N1C2C(=C([H])C(=C([H])C=2[H])F)C2C(C3C(N=2)=C([H])C([H])=C(Br)C=3[H])=C1[H]	Active
C([H])([H])([H])N1C2C(=C([H])C(=C([H])C=2[H])Cl)C2C(C3C(N=2)=C([H])C([H])=C(Cl)C=3[H])=C1[H]	Active
C([H])([H])([H])N1C2C(=C([H])C(=C([H])C=2[H])Cl)C2C(C3C(N=2)=C([H])C([H])=C(Br)C=3[H])=C1[H]	Active
O([H])C1C2C(=C([H])C([H])=C([H])C=2[H])OC(=O)C=1C(C([H])=C([H])C1C([H])=C([H])C(Cl)=C([H])C=1[H])=O	Active
C([H])([H])([H])OC1C([H])=C([H])C(C([H])([H])N(C(N2N=C(S(C3([H])C4([H])C([H])([H])C([H])(C([H])([H])C4([H])[H])C3([H])[H])(=O)=O)N=C2[H])=O)C([H])([H])[H])=C([H])C=1[H]	Active
C([H])([H])([H])N(C(N1N=C(S(C2([H])C3([H])C([H])([H])C([H])(C([H])([H])C3([H])[H])C2([H])[H])(=O)=O)N=C1[H])=O)C([H])([H])[H]	Active
ClC1C([H])=C2C(N([H])C([H])=C2C(C([H])([H])SC2C([H])=C([H])C(Br)=C([H])C=2[H])=O)=C([H])C=1[H]	Active
BrC1C([H])=C([H])C(SC([H])([H])C(C2C3C(=C([H])C([H])=C(C=3[H])Br)N([H])C=2[H])=O)=C([H])C=1[H]	Active
C([H])([H])([H])N(C(N1N=C(SC2([H])C3([H])C([H])([H])C([H])(C([H])([H])C3([H])[H])C2([H])[H])N=C1[H])=O)C([H])([H])[H]	Active
FC(C1C([H])=C(N2C3C(=C([H])N=C4C=3C([H])=C(C3C([H])=C([H])N=C([H])C=3[H])C([H])=C4[H])N([H])C2=O)C([H])=C([H])C=1[H])(F)F	Active
C([H])([H])([H])N1C2C([H])=NC3C(C=2N(C2C([H])=C(C(F)(F)F)C([H])=C([H])C=2[H])C1=O)=C([H])C(C1C([H])=C([H])C([H])=C([H])C=1[H])=C([H])C=3[H]	Active
C([H])([H])([H])OC1C([H])=C([H])C(C2(C(=O)N(C([H])([H])C([H])([H])C([H])([H])C3C([H])=C([H])C([H])=C([H])C=3[H])C(=N[H])N2[H])C2C([H])=C([H])C(OC([H])([H])[H])=C([H])C=2[H])=C([H])C=1[H]	Active
C([H])([H])([H])OC1C([H])=C(C2(C(=O)N(C3([H])C([H])([H])C([H])([H])C([H])([H])C([H])([H])C3([H])[H])C(=N[H])N2[H])C2C([H])=C([H])C([H])=C([H])C=2[H])C([H])=C([H])C=1[H]	Active
S=C(N([H])C([H])([H])C([H])(C1C([H])=C([H])C([H])=C([H])C=1[H])C1C([H])=C([H])C([H])=C([H])C=1[H])N([H])C([H])([H])C([H])([H])C([H])([H])N([H])C([H])([H])C([H])([H])C([H])([H])C([H])([H])C([H])([H])N([H])C([H])([H])C([H])([H])C([H])([H])N([H])C(N([H])C([H])([H])C([H])(C1C([H])=C([H])C([H])=C([H])C=1[H])C1C([H])=C([H])C([H])=C([H])C=1[H])=S	Active
S=C(N([H])C([H])(C1C([H])=C([H])C([H])=C([H])C=1[H])C1C([H])=C([H])C([H])=C([H])C=1[H])N([H])C([H])([H])C([H])([H])C([H])([H])N([H])C([H])([H])C([H])([H])C([H])([H])C([H])([H])C([H])([H])N([H])C([H])([H])C([H])([H])C([H])([H])N([H])C(N([H])C([H])(C1C([H])=C([H])C([H])=C([H])C=1[H])C1C([H])=C([H])C([H])=C([H])C=1[H])=S	Active
C([H])([H])([H])C(C(N([H])C([H])(C1C([H])=C([H])C(C2C([H])=C([H])C(F)=C([H])C=2[H])=C([H])C=1[H])C(N([H])O[H])=O)=O)(C([H])([H])[H])C([H])([H])[H]	Active
C([H])([H])([H])C([H])(C1([H])C2(C([H])(C3([H])C([H])(C([H])([H])C2([H])O[H])C2(C([H])(C([H])([H])C([H])(C([H])([H])C2([H])[H])O[H])C([H])([H])C3([H])[H])C([H])([H])[H])C([H])([H])C1([H])[H])C([H])([H])[H])C([H])([H])C([H])([H])C1N=C2C(C([H])=C([H])C([H])=C2[H])=C(C([H])(C2([H])N3C([H])([H])C([H])(C([H])(C([H])([H])C3([H])[H])C2([H])[H])C([H])=C([H])[H])O[H])C=1[H]	Active
C([H])([H])([H])N1C2C(=C([H])C(=C([H])C=2[H])Cl)C2C(C3C(N=2)=C([H])C([H])=C([H])C=3[H])=C1[H]	Active
C([H])([H])([H])OC1C([H])=C2C(N=C(C([H])=C2C([H])(C2([H])N3C([H])([H])C([H])(C([H])(C([H])([H])C3([H])[H])C2([H])[H])C([H])=C([H])[H])O[H])C([H])([H])C([H])([H])C([H])(C2([H])C3(C([H])(C4([H])C([H])(C([H])([H])C3([H])O[H])C3(C([H])(C([H])([H])C([H])(C([H])([H])C3([H])[H])O[H])C([H])([H])C4([H])[H])C([H])([H])[H])C([H])([H])C2([H])[H])C([H])([H])[H])C([H])([H])[H])=C([H])C=1[H]	Active
S=C(N([H])C([H])([H])C([H])([H])C([H])(C1C([H])=C([H])C([H])=C([H])C=1[H])C1C([H])=C([H])C([H])=C([H])C=1[H])N([H])C([H])([H])C([H])([H])C([H])([H])N([H])C([H])([H])C([H])([H])C([H])([H])C([H])([H])C([H])([H])C([H])([H])C([H])([H])N([H])C([H])([H])C([H])([H])C([H])([H])N([H])C(N([H])C([H])([H])C([H])([H])C([H])(C1C([H])=C([H])C([H])=C([H])C=1[H])C1C([H])=C([H])C([H])=C([H])C=1[H])=S	Active
S=C(N([H])C([H])([H])C([H])(C1C([H])=C([H])C([H])=C([H])C=1[H])C1C([H])=C([H])C([H])=C([H])C=1[H])N([H])C([H])([H])C([H])([H])C([H])([H])N([H])C([H])([H])C([H])([H])C([H])([H])C([H])([H])C([H])([H])C([H])([H])C([H])([H])N([H])C([H])([H])C([H])([H])C([H])([H])N([H])C(N([H])C([H])([H])C([H])(C1C([H])=C([H])C([H])=C([H])C=1[H])C1C([H])=C([H])C([H])=C([H])C=1[H])=S	Active
S=C(N([H])C([H])([H])C([H])(C1C([H])=C([H])C([H])=C([H])C=1[H])C1C([H])=C([H])C([H])=C([H])C=1[H])N([H])C([H])([H])C([H])([H])C([H])([H])N([H])C([H])([H])C([H])([H])C([H])([H])C([H])([H])C([H])([H])C([H])([H])N([H])C([H])([H])C([H])([H])C([H])([H])N([H])C(N([H])C([H])([H])C([H])(C1C([H])=C([H])C([H])=C([H])C=1[H])C1C([H])=C([H])C([H])=C([H])C=1[H])=S	Active
S=C(N([H])C([H])(C1C([H])=C([H])C([H])=C([H])C=1[H])C1C([H])=C([H])C([H])=C([H])C=1[H])N([H])C([H])([H])C([H])([H])C([H])([H])N([H])C([H])([H])C([H])([H])C([H])([H])C([H])([H])C([H])([H])C([H])([H])C([H])([H])N([H])C([H])([H])C([H])([H])C([H])([H])N([H])C(N([H])C([H])(C1C([H])=C([H])C([H])=C([H])C=1[H])C1C([H])=C([H])C([H])=C([H])C=1[H])=S	Active
C([H])([H])(C1C([H])=C([H])C(C([H])([H])N2C([H])([H])C([H])([H])C([H])(C3C4C(=C([H])C([H])=C([H])C=4[H])N([H])C=3[H])C([H])([H])C2([H])[H])=C([H])C=1[H])N1C([H])([H])C([H])([H])C([H])(C2C3C(=C([H])C([H])=C([H])C=3[H])N([H])C=2[H])C([H])([H])C1([H])[H]	Active
C([H])([H])([H])C1C([H])=C(C2(C(=O)N(C3([H])C([H])([H])C([H])([H])C([H])([H])C([H])([H])C3([H])[H])C(=N[H])N2[H])C2C([H])=C(C([H])([H])[H])C([H])=C([H])C=2[H])C([H])=C([H])C=1[H]	Active
C([H])([H])([H])OC1C([H])=C([H])C(C2(C(=O)N(C3([H])C([H])([H])C([H])([H])C([H])([H])C([H])([H])C3([H])[H])C(=N[H])N2[H])C2C([H])=C([H])C([H])=C([H])C=2[H])=C([H])C=1[H]	Active
C([H])([H])([H])OC1C([H])=C([H])C(C([H])([H])N(C(N2N=C(S(C3([H])C4([H])C([H])([H])C([H])(C([H])([H])C4([H])[H])C3([H])[H])(=O)=O)N=C2[H])=O)C([H])(C([H])([H])[H])C([H])([H])[H])=C([H])C=1[H]	Active
S=C(N([H])C([H])([H])C([H])(C1C([H])=C([H])C([H])=C([H])C=1[H])C1C([H])=C([H])C([H])=C([H])C=1[H])N([H])C([H])([H])C([H])([H])C([H])([H])N([H])C([H])([H])C([H])([H])C([H])([H])C([H])([H])N([H])C([H])([H])C([H])([H])C([H])([H])N([H])C(N([H])C([H])([H])C([H])(C1C([H])=C([H])C([H])=C([H])C=1[H])C1C([H])=C([H])C([H])=C([H])C=1[H])=S	Active
C([H])([H])([H])C([H])([H])C([H])([H])N([H])C(N([H])C([H])([H])C([H])([H])C([H])([H])N([H])C([H])([H])C([H])([H])C([H])([H])C([H])([H])C([H])([H])C([H])([H])N([H])C([H])([H])C([H])([H])C([H])([H])N([H])C(N([H])C([H])([H])C([H])([H])C([H])([H])[H])=S)=S	Active
S=C(N([H])C([H])([H])C([H])([H])C([H])(C1C([H])=C([H])C([H])=C([H])C=1[H])C1C([H])=C([H])C([H])=C([H])C=1[H])N([H])C([H])([H])C([H])([H])C([H])([H])N([H])C([H])([H])C([H])([H])C([H])([H])C([H])([H])N([H])C([H])([H])C([H])([H])C([H])([H])N([H])C(N([H])C([H])([H])C([H])([H])C([H])(C1C([H])=C([H])C([H])=C([H])C=1[H])C1C([H])=C([H])C([H])=C([H])C=1[H])=S	Active
C([H])([H])([H])OC1C(OC([H])([H])[H])=C([H])C(C([H])=C([H])C(C2C(=O)OC3C(=C([H])C([H])=C([H])C=3[H])C=2O[H])=O)=C([H])C=1[H]	Active
C([H])([H])([H])OC1C([H])=C([H])C(C2(C(=O)N(C3([H])C([H])([H])C([H])([H])C([H])([H])C([H])([H])C([H])([H])C3([H])[H])C(=N[H])N2[H])C2C([H])=C([H])C(OC([H])([H])[H])=C([H])C=2[H])=C([H])C=1[H]	Active
C([H])([H])([H])OC1C([H])=C([H])C(C2(C(=O)N(C3([H])C([H])([H])C([H])([H])C([H])([H])C([H])([H])C3([H])[H])C(=N[H])N2[H])C2C([H])=C([H])C(OC([H])([H])[H])=C([H])C=2[H])=C([H])C=1[H]	Active
C([H])([H])([H])OC1C([H])=C([H])C(C2(C(=O)N(C3([H])C([H])([H])C([H])([H])C([H])([H])C3([H])[H])C(=N[H])N2[H])C2C([H])=C([H])C(OC([H])([H])[H])=C([H])C=2[H])=C([H])C=1[H]	Active
FC(C1C([H])=C(N2C3C(=C([H])N=C4C=3C([H])=C(C3C([H])=C(C#N)C([H])=C([H])C=3[H])C([H])=C4[H])N([H])C2=O)C([H])=C([H])C=1[H])(F)F	Active
C([H])([H])([H])C([H])([H])C([H])([H])C([H])([H])C1C([H])=C([H])C(C2C([H])=C3C(C(N(C(N([H])[H])=N3)C([H])([H])C3([H])OC([H])(C4C([H])=C([H])C([H])=C([H])C=4[H])C([H])([H])C3([H])[H])=O)=C([H])C=2[H])=C([H])C=1[H]	Active
O=C(N([H])C([H])([H])C1C([H])=C([H])C([H])=C([H])C=1[H])N([H])C([H])([H])C([H])([H])C([H])([H])N([H])C([H])([H])C([H])([H])C([H])([H])C([H])([H])C([H])([H])C([H])([H])N([H])C([H])([H])C([H])([H])C([H])([H])N([H])C(N([H])C([H])([H])C1C([H])=C([H])C([H])=C([H])C=1[H])=O	Active
C([H])([H])([H])C([H])([H])N1C(=O)C2(C([H])([H])C([H])([H])N(C([H])([H])C3C(O[H])=C([H])C([H])=C(Br)C=3[H])C([H])([H])C2([H])[H])N(C([H])([H])C([H])([H])C([H])(C([H])([H])[H])C([H])([H])[H])C1=O	Active
C([H])([H])([H])C([H])([H])N1C(=O)C2(C([H])([H])C([H])([H])N(C([H])([H])C3C(O[H])=C([H])C([H])=C(Cl)C=3[H])C([H])([H])C2([H])[H])N(C([H])([H])C([H])([H])C([H])(C([H])([H])[H])C([H])([H])[H])C1=O	Active
C([H])([H])([H])C([H])(C1C([H])=C([H])C(C2N(C([H])([H])C3C([H])=C([H])C([H])=C([H])C=3[H])N=NC=2C(C2C([H])=C([H])C(Cl)=C([H])C=2[H])(C([H])([H])N([H])C2C([H])=C([H])C(Br)=C([H])C=2[H])O[H])=C([H])C=1[H])C([H])([H])[H]	Active
C([H])([H])([H])C(C(N([H])C([H])(C1C([H])=C([H])C(Br)=C([H])C=1[H])C(N([H])O[H])=O)=O)(C([H])([H])[H])C([H])([H])[H]	Active
C([H])([H])([H])N1C2C(=C([H])C(=C([H])C=2F)Cl)C2C(C3C(N=2)=C([H])C([H])=C(Br)C=3[H])=C1[H]	Active
